# Supplementary material for: Four novel candidate causal variants for deficient homozygous haplotypes in Holstein cattle
Source: PubMed Central journal article supplement (PMC8971413; doi:10.1038/s41598-022-09403-6), 2022-03-31
Supplement: 41598_2022_9403_MOESM1_ESM.pdf [file 41598_2022_9403_MOESM1_ESM.pdf]

**Figure S1-S18:** Manhattan plots and their QQ-plots of the GWAS of the Swiss Holstein population. There is a page for the fertility, birth and growth-related trait group, including a Manhattan plot for every single trait in the group trait according to Table 2.

# HO fertility traits

Figure S1: GWAS trait NRh

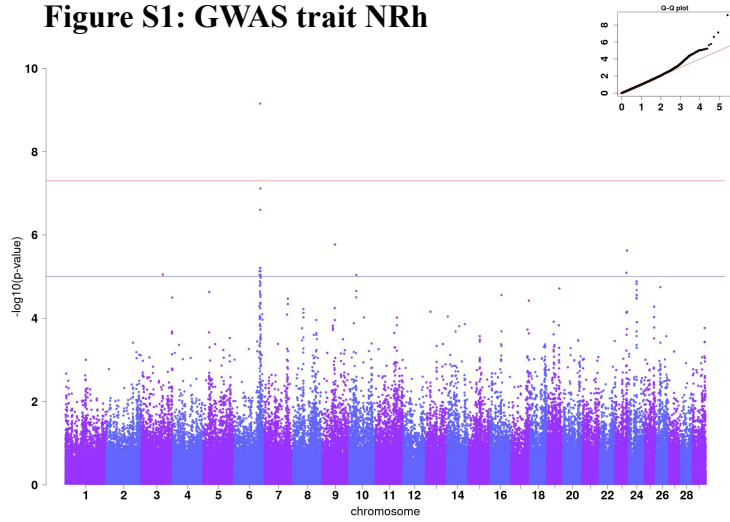

Figure S3: GWAS trait IFLh

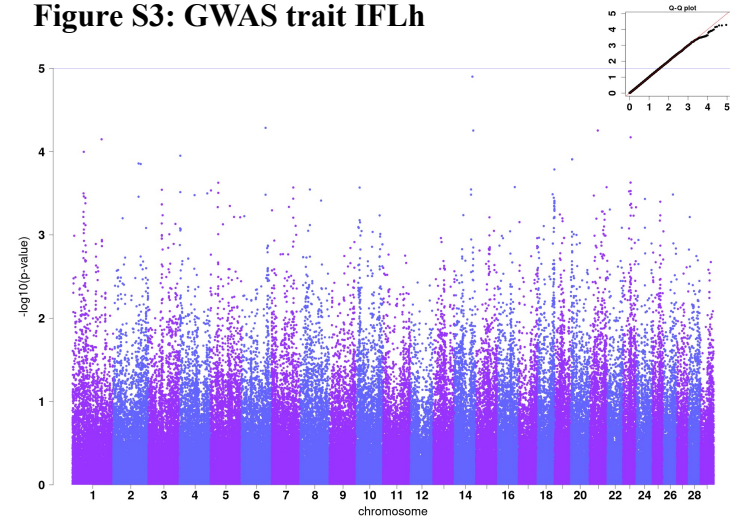

Figure S2: GWAS trait NRc

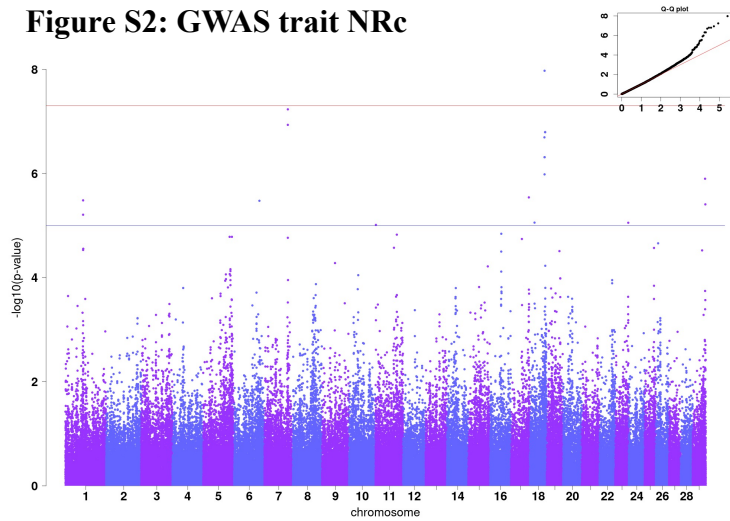

Figure S4: GWAS trait IFLc

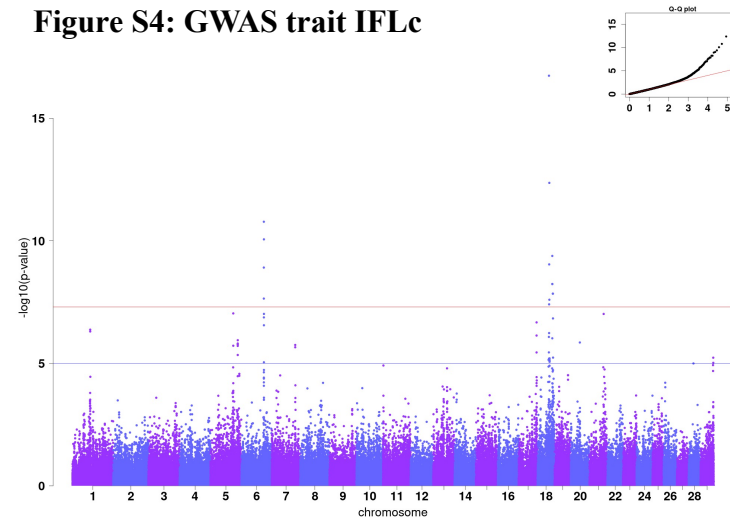

Figure S5: GWAS trait DFS

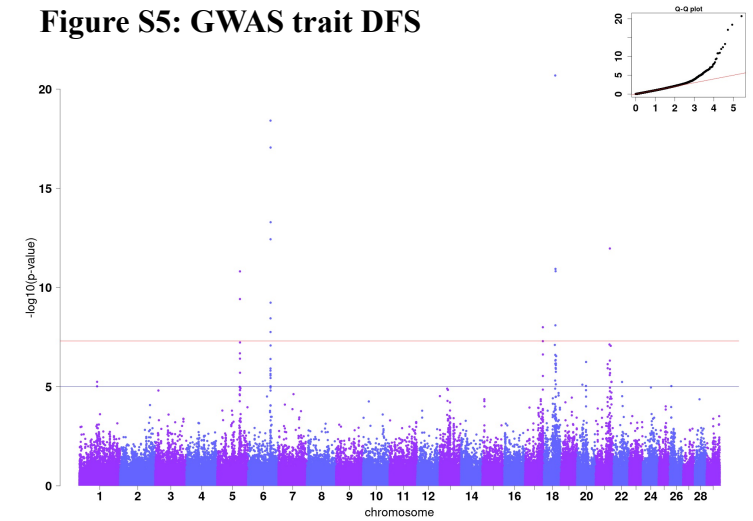

# HO birth traits

Figure S6: GWAS trait CED

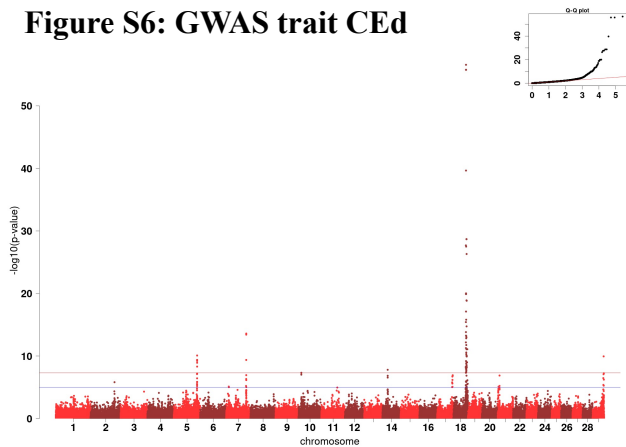

Figure S8: GWAS trait SBd

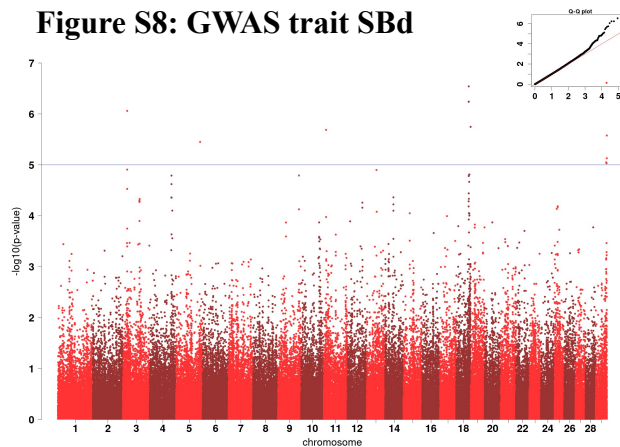

Figure S10: GWAS trait BWd

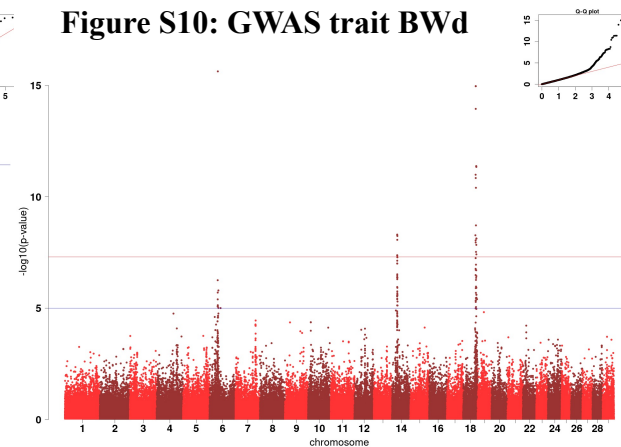

Figure S12: GWAS trait GLd

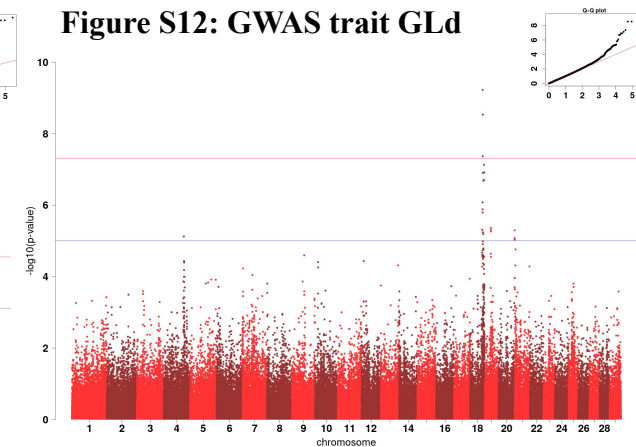

Figure S7: GWAS trait CEM

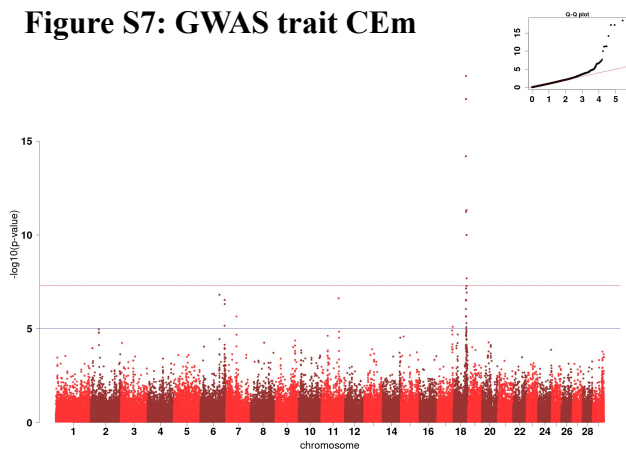

Figure S9: GWAS trait SBm

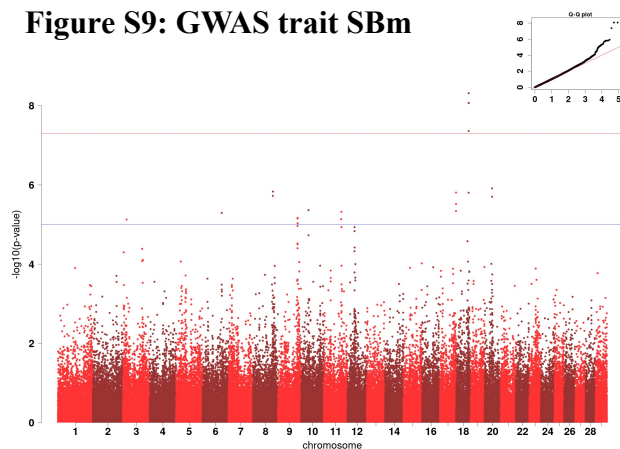

Figure S11: GWAS trait BWm

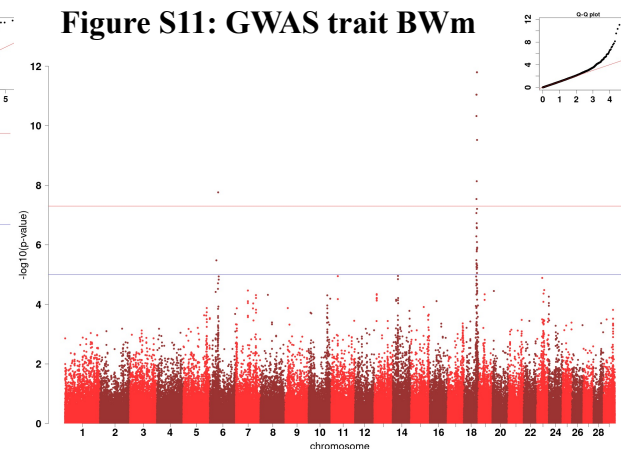

Figure S13: GWAS trait GLm

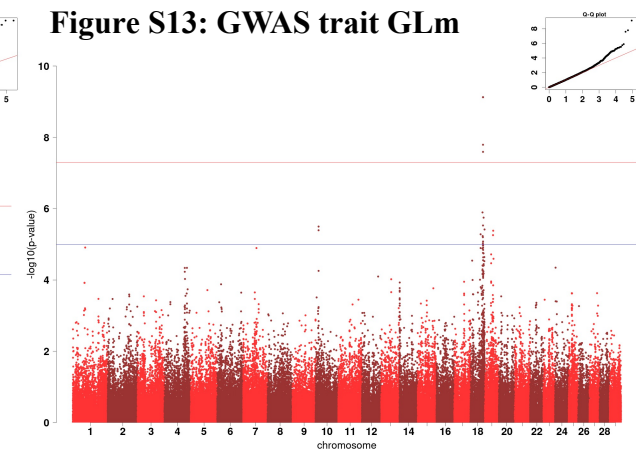

# HO birth traits

Figure S14: GWAS trait MBd

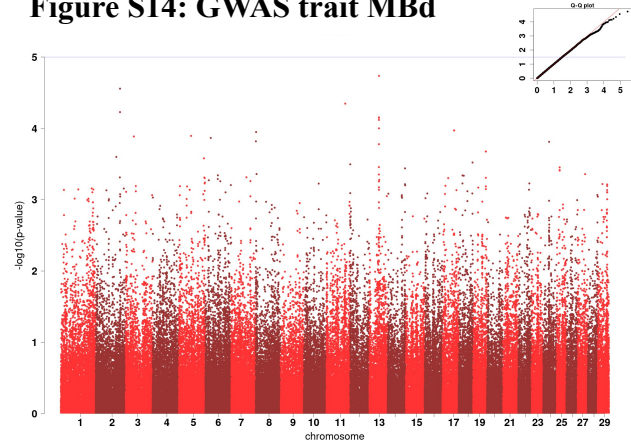

Figure S15: GWAS trait MBm

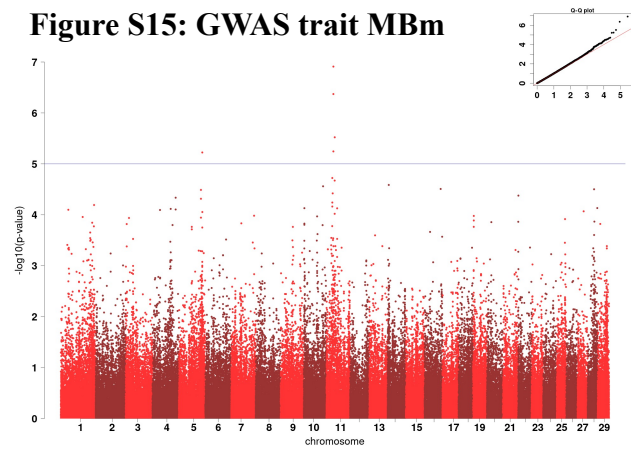

# HO survival traits

Figure S16: GWAS trait P1

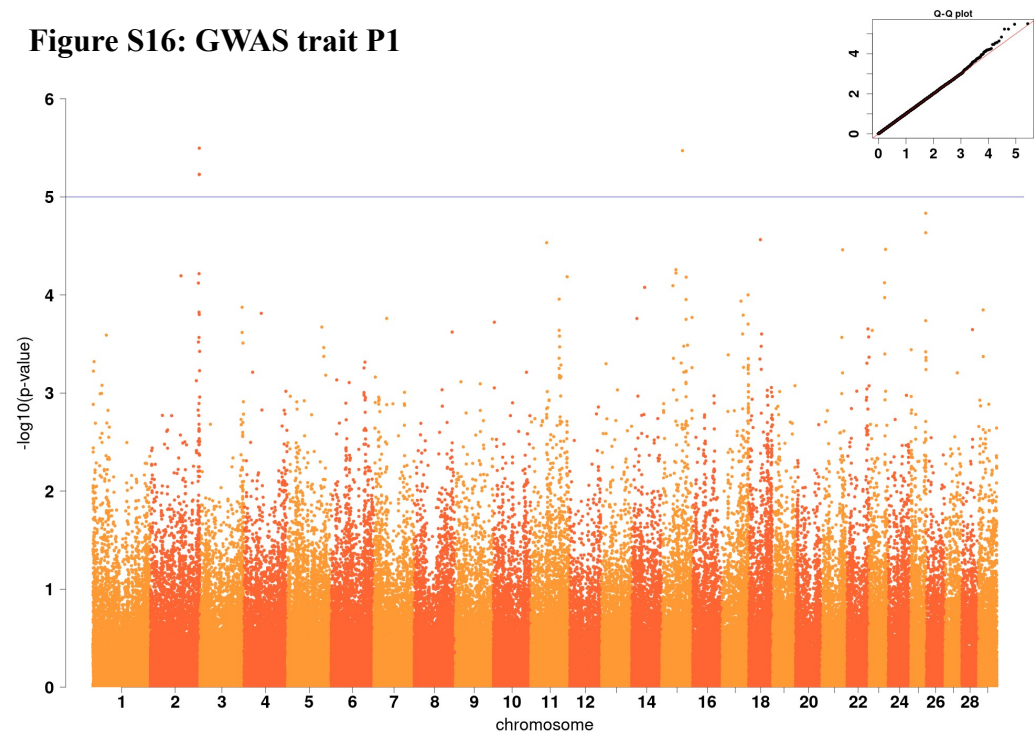

Figure S17: GWAS trait P1b

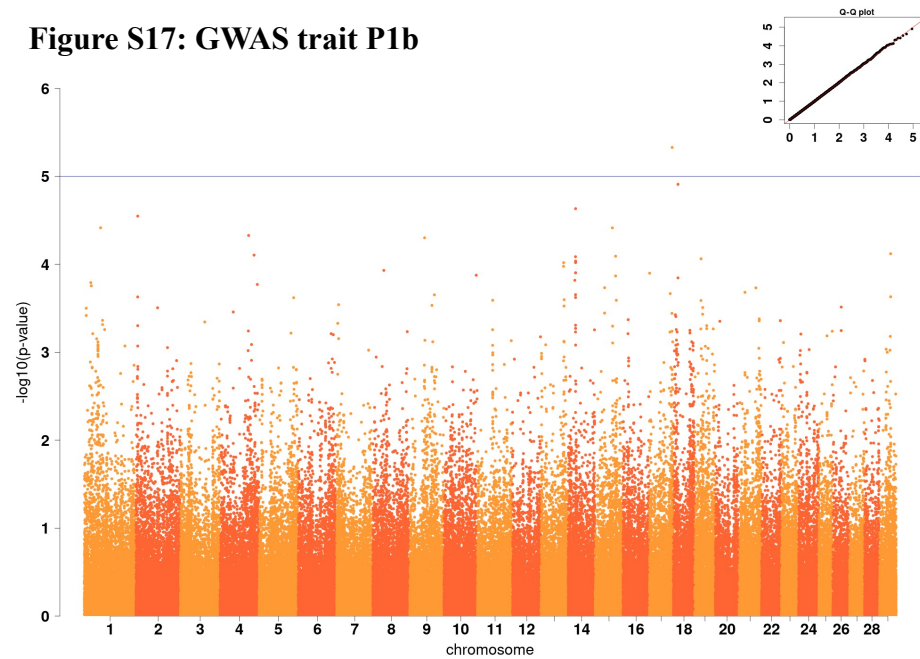

Figure S18: GWAS trait P1h

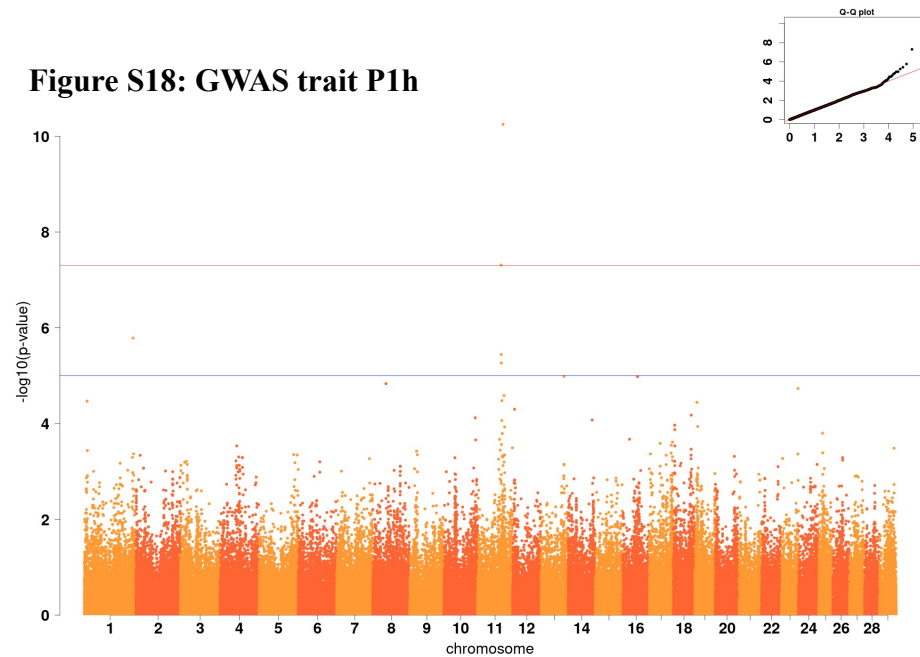



**Supplementary Table S1: Previously identified haplotypes in different Holstein populations.**

| <b>population first detected in</b> | <b>haplotype name</b> | <b>alternative name</b>                                                                  | <b>associated disorder</b> | <b>chr</b> | <b>genomic region <sup>a</sup></b> | <b>associated gene</b> | <b>OMIA / OMIM</b>   | <b>publications</b>                                                                                                                          |
|-------------------------------------|-----------------------|------------------------------------------------------------------------------------------|----------------------------|------------|------------------------------------|------------------------|----------------------|----------------------------------------------------------------------------------------------------------------------------------------------|
| Danish                              | HH0                   | HBY (Fritz et al., 2018); 21-276, 21-301, 21-326 (Sahana et al., 2013)                   | brachyspina                | 21         | 20.1-22.6Mb                        | <i>FANCI</i>           | 000151-9913 / 611360 | Agerholm et al., 2006; Charlier et al., 2012; Sahana et al., 2013; Cole et al., 2018; Fritz et al., 2018; Wu et al., 2019; Hozé et al., 2020 |
| American                            | HH1                   | 133.74 (VanRaden et al., 2011)                                                           | embryonic lethality        | 5          | 58-66Mb                            | <i>APAF1</i>           | 000001-9913 / 602233 | VanRaden et al., 2011; Adams et al., 2016; Cole et al., 2018; Fritz et al., 2018; Hozé et al., 2020                                          |
| American                            | HH2                   | 21.337 (VanRaden et al., 2011)                                                           | abortion                   | 1          | 92-97Mb                            | <i>IFT80</i>           | 001823-9913          | VanRaden et al., 2011; McClure et al., 2014; Cole et al., 2018; Ortega et al. 2021                                                           |
| American                            | HH3                   | 218.61 (VanRaden et al., 2011); 08-1276, 08-1301, 08-1326, 08-1351 (Sahana et al., 2013) | abortion                   | 8          | 90-95Mb                            | <i>SMC2</i>            | 001824-9913 / 605576 | VanRaden et al., 2011; Sahana et al., 2013; McClure et al., 2014; Cole et al., 2018; Wu et al., 2019; Hozé et al., 2020                      |

|          |       |                                                 |                                              |    |                |                |                      |                                                                                    |
|----------|-------|-------------------------------------------------|----------------------------------------------|----|----------------|----------------|----------------------|------------------------------------------------------------------------------------|
| American | 175.5 | 07-126 (Sahana et al., 2013); HH20 (this study) | abortion                                     | 7  | 3-9Mb          |                | 001908-9913          | VanRaden et al., 2011; Sahana et al., 2013                                         |
| American | 369.1 |                                                 | abortion                                     | 15 | 72-76Mb        |                |                      | VanRaden et al., 2011                                                              |
| French   | HH4   |                                                 | abortion                                     | 1  | 0.1-3.3Mb      | <i>GART</i>    | 001826-9913 / 138440 | Fritz et al., 2013; Cole et al., 2018; Hozé et al., 2020                           |
| American | HH5   |                                                 | abortion                                     | 9  | 94.0-96.5Mb    | <i>TFB1M</i>   | 001941-9913 / 607033 | Schütz et al., 2016; Cole et al., 2018; Fritz et al., 2018; Hozé et al., 2020      |
| German   | CDH   |                                                 | cholesterol deficiency; juvenile mortality   | 11 | 77.3-78.2Mb    | <i>APOB</i>    | 001965-9913 / 107730 | Kipp et al., 2016; Menzi et al., 2016; Schütz et al., 2016; Cole et al., 2018      |
| American | HHB   |                                                 | bovine leukocyte adhesion deficiency         | 1  | 139-145Mb      | <i>ITGB2</i>   | 000595-9913 / 600065 | Shuster et al., 1992; Cole et al., 2018                                            |
| Danish   | HHC   | HH6 (Fritz et al., 2013)                        | complex vertebral malformation               | 3  | 42-44Mb-52.6Mb | <i>SLC35A3</i> | 001340-9913/605632   | Agerholm et al., 2001; Thomsen et al., 2006; Fritz et al., 2013; Cole et al., 2018 |
| American | HHD   |                                                 | Deficiency of uridine monophosphate synthase | 1  | 55-67Mb        | <i>UMPS</i>    | 000262-9913 / 613891 | Shanks et al., 1984; Schwenger et al., 1993; Cole et al., 2018                     |
| French   | HH6   |                                                 | embryonic lethality                          | 16 | 26-31.9Mb      | <i>SDE2</i>    | 002149-9913          | Fritz et al., 2018; Hozé et al., 2020                                              |
| French   | HH7   |                                                 | embryonic lethality                          | 27 | 13.0-14.3Mb    | <i>CENPU</i>   | 001830-9913 / 611511 | Hozé et al., 2020                                                                  |
| French   | HH7   |                                                 | reduced homozygosity                         | 6  | 51.6-52.6Mb    |                |                      | Fritz et al., 2013                                                                 |
| French   | HH8   |                                                 | reduced homozygosity                         | 7  | 76.6-77.8Mb    |                | 001831-9913          | Fritz et al., 2013                                                                 |
| French   | HH9   |                                                 | reduced homozygosity                         | 10 | 74.5-76.7Mb    |                | 001832-9913          | Fritz et al., 2013                                                                 |
| French   | HH10  |                                                 | reduced homozygosity                         | 11 | 31.6-33.4Mb    |                | 001834-9913          | Fritz et al., 2013                                                                 |



|        |         |                         |    |               |             |                     |
|--------|---------|-------------------------|----|---------------|-------------|---------------------|
| French | HH11    | reduced homozygosity    | 12 | 20.5-36.4Mb   | 001833-9913 | Fritz et al., 2013  |
| French | HH12    | reduced homozygosity    | 15 | 76.5-78.3Mb   | 001835-9913 | Fritz et al., 2013  |
| French | HH13    | reduced homozygosity    | 18 | 55.9-59.2Mb   | 001836-9913 | Fritz et al., 2013  |
| French | HH14    | reduced homozygosity    | 19 | 42.1-43.3Mb   | 001837-9913 | Fritz et al., 2013  |
| French | HH15    | reduced homozygosity    | 20 | 58.4-59.5Mb   | 001838-9913 | Fritz et al., 2013  |
| French | HH16    | reduced homozygosity    | 26 | 10.4-12.8Mb   | 001839-9913 | Fritz et al., 2013  |
| French | HH17    | reduced homozygosity    | 26 | 25.3-26.4Mb   | 001840-9913 | Fritz et al., 2013  |
| Nordic | 05-826  | reduced homozygosity    | 5  | 66.4-68.3Mb   | 001906-9913 | Sahana et al., 2013 |
| Nordic | 05-1351 | reduced homozygosity    | 5  | 106.2-107.1Mb | 001907-9913 | Sahana et al., 2013 |
| Nordic | 05-1476 | reduced homozygosity    | 5  | 112.1-113.7Mb | 001907-9913 | Sahana et al., 2013 |
| Nordic | 07-501  | reduced homozygosity    | 7  | 33.3-34.8Mb   | 001909-9913 | Sahana et al., 2013 |
| Nordic | 11-926  | reduced homozygosity    | 11 | 55.4-57.4Mb   | 001910-9913 | Sahana et al., 2013 |
| Nordic | 11-976  | reduced homozygosity    | 11 | 59.2-60.6Mb   | 001910-9913 | Sahana et al., 2013 |
| Nordic | 11-1001 | reduced homozygosity    | 11 | 60.7-62.2Mb   | 001910-9913 | Sahana et al., 2013 |
| Nordic | 11-1026 | reduced homozygosity    | 11 | 62.2-63.8Mb   | 001910-9913 | Sahana et al., 2013 |
| Nordic | 19-151  | reduced homozygosity    | 19 | 12.8-14.2Mb   | 001911-9913 | Sahana et al., 2013 |
| Nordic | 02-36   | embryonic lethality     | 2  | 35.4-36.1Mb   |             | Wu et al., 2019     |
| Nordic | 05-7    | embryonic lethality     | 5  | 6.9-7.8Mb     |             | Wu et al., 2019     |
| Nordic | 03-70   | absence of homozygosity | 3  | 70.3-70.8Mb   |             | Wu et al., 2019     |
| Nordic | 06-0    | absence of homozygosity | 6  | 0.4-0.8Mb     |             | Wu et al., 2019     |
| Nordic | 09-24   | absence of homozygosity | 9  | 23.9-25.0Mb   |             | Wu et al., 2019     |
| Nordic | 09-58   | absence of homozygosity | 9  | 57.6-58.6Mb   |             | Wu et al., 2019     |
| Nordic | 10-27   | absence of homozygosity | 10 | 26.4-27.6Mb   |             | Wu et al., 2019     |
| Nordic | 15-47   | absence of homozygosity | 15 | 47.1-47.5Mb   |             | Wu et al., 2019     |

|        |       |                            |    |             |                 |
|--------|-------|----------------------------|----|-------------|-----------------|
| Nordic | 17-33 | absence of<br>homozygosity | 17 | 32.6-33.0Mb | Wu et al., 2019 |
|--------|-------|----------------------------|----|-------------|-----------------|

---

<sup>a</sup> according to the reference sequence ARS-UCD1.2 (National Center for Biotechnology Information, 2018a)

**Supplementary Table S2: Sample ids from whole-genome sequencing samples stored in the European Nucleotide Archive.**

| <b>EBI Sample ID</b> | <b>avCov</b> | <b>insertSize</b> | <b>breed</b>       |
|----------------------|--------------|-------------------|--------------------|
| SAMEA5159765         | 10.3         | 347.3             | Simmental          |
| SAMEA5159766         | 10.2         | 372.6             | Simmental          |
| SAMEA5159767         | 11.0         | 361.4             | Original Braunvieh |
| SAMEA5159768         | 10.9         | 387.0             | Original Braunvieh |
| SAMEA5159769         | 12.6         | 328.3             | Brown Swiss        |
| SAMEA5159770         | 10.2         | 352.2             | Brown Swiss        |
| SAMEA5159771         | 11.1         | 336.8             | Brown Swiss        |
| SAMEA5159772         | 12.2         | 338.4             | Brown Swiss        |
| SAMEA5159773         | 11.1         | 349.9             | Brown Swiss        |
| SAMEA5159774         | 11.8         | 344.4             | Brown Swiss        |
| SAMEA5159775         | 11.9         | 356.3             | Brown Swiss        |
| SAMEA5159776         | 11.1         | 347.6             | Original Braunvieh |
| SAMEA5159777         | 11.4         | 320.9             | Brown Swiss        |
| SAMEA5159778         | 14.0         | 321.9             | Brown Swiss        |
| SAMEA5159779         | 11.3         | 333.1             | Brown Swiss        |
| SAMEA5159780         | 13.1         | 309.1             | Brown Swiss        |
| SAMEA5159781         | 13.3         | 356.2             | Brown Swiss        |
| SAMEA5159782         | 11.9         | 365.1             | Brown Swiss        |
| SAMEA5159783         | 12.4         | 364.9             | Brown Swiss        |
| SAMEA5159784         | 12.5         | 377.6             | Brown Swiss        |
| SAMEA5159785         | 12.5         | 351.1             | Brown Swiss        |
| SAMEA5159786         | 12.5         | 343.8             | Brown Swiss        |
| SAMEA5159787         | 14.5         | 369.9             | Brown Swiss        |
| SAMEA5159788         | 11.5         | 363.0             | Brown Swiss        |
| SAMEA5159789         | 10.9         | 359.9             | Original Braunvieh |
| SAMEA5159790         | 11.2         | 361.9             | Original Braunvieh |
| SAMEA5159791         | 10.8         | 373.2             | Brown Swiss        |
| SAMEA5159792         | 11.3         | 366.6             | Brown Swiss        |
| SAMEA5159793         | 12.7         | 356.7             | Brown Swiss        |
| SAMEA5159794         | 12.3         | 382.8             | Original Braunvieh |
| SAMEA5159795         | 13.6         | 372.7             | Original Braunvieh |
| SAMEA5159796         | 12.2         | 375.5             | Original Braunvieh |
| SAMEA5159797         | 12.9         | 343.3             | Brown Swiss        |
| SAMEA5159798         | 14.0         | 370.1             | Brown Swiss        |
| SAMEA5159799         | 10.8         | 366.9             | Brown Swiss        |
| SAMEA5159800         | 14.2         | 357.8             | Simmental          |
| SAMEA5159801         | 13.5         | 374.5             | Simmental          |
| SAMEA5159802         | 13.5         | 367.2             | Holstein           |
| SAMEA5159803         | 12.1         | 372.2             | Simmental          |
| SAMEA5159804         | 13.1         | 389.2             | Holstein           |
| SAMEA5159805         | 11.6         | 357.6             | Simmental          |
| SAMEA5159806         | 11.0         | 382.2             | Simmental          |
| SAMEA5159807         | 11.4         | 384.4             | Simmental          |

|               |      |       |                    |
|---------------|------|-------|--------------------|
| SAMEA5159808  | 11.7 | 376.2 | Holstein           |
| SAMEA5159809  | 11.6 | 354.2 | Holstein           |
| SAMEA5159810  | 11.8 | 368.0 | Holstein           |
| SAMEA5159811  | 11.9 | 365.4 | Simmental          |
| SAMEA5159812  | 11.9 | 378.1 | Simmental          |
| SAMEA5159813  | 11.2 | 376.1 | Holstein           |
| SAMEA5159814  | 12.2 | 374.5 | Holstein           |
| SAMEA5159815  | 12.8 | 374.9 | Holstein           |
| SAMEA5159816  | 11.7 | 382.2 | Holstein           |
| SAMEA5159817  | 11.4 | 352.8 | Holstein           |
| SAMEA5159818  | 11.9 | 359.5 | Holstein           |
| SAMEA5159819  | 12.8 | 364.5 | Holstein           |
| SAMEA5159820  | 11.5 | 357.3 | Holstein           |
| SAMEA5159821  | 11.4 | 376.3 | Holstein           |
| SAMEA5159822  | 12.1 | 379.3 | Holstein           |
| SAMEA5159823  | 11.9 | 386.1 | Simmental          |
| SAMEA5159824  | 10.2 | 377.5 | Simmental          |
| SAMEA5159825  | 11.8 | 349.2 | Simmental          |
| SAMEA5159826  | 10.2 | 349.5 | Holstein           |
| SAMEA5159827  | 10.7 | 359.5 | Simmental          |
| SAMEA5159828  | 12.1 | 342.0 | Holstein           |
| SAMEA5159760  | 17.4 | 266.5 | Simmental          |
| SAMEA5159761  | 17.5 | 240.1 | Brown Swiss        |
| SAMEA3706825  | 10.8 | 404.8 | Angus              |
| SAMEA5415491  | 19.5 | 388.3 | Belgium Blue       |
| SAMEA4051550  | 13.2 | 271.5 | Galloway           |
| SAMEA4644752  | 18.5 | 406.3 | Shorthorn          |
| SAMEA8565029  | 16.2 | 313.7 | Original Braunvieh |
| SAMEA4644757  | 14.3 | 397.4 | Brown Swiss        |
| SAMEA4644727  | 18.2 | 387.7 | Brown Swiss        |
| SAMEA4644734  | 18.9 | 397.5 | Original Braunvieh |
| SAMEA5714976  | 21.1 | 309.9 | Brown Swiss        |
| SAMEA19315168 | 15.9 | 453.6 | Brown Swiss        |
| SAMEA5415485  | 20.5 | 383.0 | Brown Swiss        |
| SAMEA6528890  | 17.1 | 400.7 | Original Braunvieh |
| SAMEA4644764  | 13.7 | 419.4 | Original Braunvieh |
| SAMEA5714974  | 25.5 | 491.1 | Original Braunvieh |
| SAMEA8565036  | 21.5 | 350.5 | Brown Swiss        |
| SAMEA5159847  | 26.1 | 448.7 | Brown Swiss        |
| SAMEA5159886  | 37.0 | 483.1 | Original Braunvieh |
| SAMEA4644728  | 18.5 | 407.2 | Brown Swiss        |
| SAMEA4644749  | 17.5 | 397.1 | Original Braunvieh |
| SAMEA6528886  | 23.5 | 393.5 | Original Braunvieh |
| SAMEA8565035  | 23.3 | 350.1 | Original Braunvieh |
| SAMEA8565034  | 21.0 | 337.3 | Original Braunvieh |
| SAMEA4644750  | 18.6 | 352.6 | Original Braunvieh |
| SAMEA6528894  | 18.4 | 404.2 | Original Braunvieh |
| SAMEA8565033  | 21.0 | 329.0 | Brown Swiss        |

|               |      |       |                    |
|---------------|------|-------|--------------------|
| SAMEA6528892  | 20.7 | 386.9 | Original Braunvieh |
| SAMEA4644762  | 18.2 | 430.7 | Brown Swiss        |
| SAMEA4644739  | 17.4 | 401.6 | Brown Swiss        |
| SAMEA4644755  | 17.3 | 406.2 | Brown Swiss        |
| SAMEA5415486  | 24.2 | 375.9 | Brown Swiss        |
| SAMEA5564716  | 16.8 | 442.6 | Brown Swiss        |
| SAMEA5564728  | 19.8 | 368.0 | Original Braunvieh |
| SAMEA19312918 | 11.1 | 399.3 | Brown Swiss        |
| SAMEA5415489  | 23.0 | 428.1 | Brown Swiss        |
| SAMEA4644763  | 14.6 | 392.8 | Brown Swiss        |
| SAMEA4644766  | 21.4 | 415.7 | Brown Swiss        |
| SAMEA19323418 | 28.9 | 414.2 | Brown Swiss        |
| SAMEA5714979  | 28.0 | 453.6 | Brown Swiss        |
| SAMEA6528889  | 18.1 | 392.4 | Original Braunvieh |
| SAMEA19313668 | 17.2 | 399.0 | Brown Swiss        |
| SAMEA4644769  | 21.8 | 460.9 | Brown Swiss        |
| SAMEA8565098  | 21.2 | 337.2 | Brown Swiss        |
| SAMEA19314418 | 17.7 | 447.3 | Brown Swiss        |
| SAMEA4644754  | 19.1 | 393.7 | Brown Swiss        |
| SAMEA5159853  | 31.7 | 467.9 | Brown Swiss        |
| SAMEA4644765  | 16.0 | 413.8 | Brown Swiss        |
| SAMEA4644768  | 17.4 | 429.4 | Original Braunvieh |
| SAMEA5415488  | 22.9 | 360.4 | Brown Swiss        |
| SAMEA6528891  | 23.6 | 381.6 | Original Braunvieh |
| SAMEA8565097  | 21.0 | 346.7 | Brown Swiss        |
| SAMEA5714971  | 20.1 | 377.6 | Brown Swiss        |
| SAMEA8565096  | 14.7 | 416.1 | Original Braunvieh |
| SAMEA6528888  | 17.1 | 370.1 | Original Braunvieh |
| SAMEA4644741  | 19.4 | 405.1 | Original Braunvieh |
| SAMEA4827664  | 12.6 | 405.1 | Original Braunvieh |
| SAMEA4827655  | 12.7 | 426.7 | Original Braunvieh |
| SAMEA4644743  | 19.3 | 408.9 | Brown Swiss        |
| SAMEA4827671  | 12.4 | 433.2 | Original Braunvieh |
| SAMEA4827649  | 13.1 | 425.8 | Original Braunvieh |
| SAMEA5159875  | 22.8 | 440.7 | Brown Swiss        |
| SAMEA4827653  | 10.8 | 425.9 | Original Braunvieh |
| SAMEA4827657  | 9.4  | 426.2 | Original Braunvieh |
| SAMEA4827663  | 12.5 | 410.4 | Original Braunvieh |
| SAMEA4827661  | 10.8 | 418.4 | Original Braunvieh |
| SAMEA4827662  | 19.2 | 399.8 | Original Braunvieh |
| SAMEA4827658  | 10.9 | 429.3 | Original Braunvieh |
| SAMEA7690216  | 17.4 | 335.3 | Original Braunvieh |
| SAMEA4827646  | 14.6 | 417.7 | Original Braunvieh |
| SAMEA4827659  | 10.7 | 420.3 | Original Braunvieh |
| SAMEA4827652  | 11.8 | 421.4 | Original Braunvieh |
| SAMEA4827656  | 13.2 | 425.3 | Original Braunvieh |
| SAMEA4827669  | 14.0 | 427.1 | Original Braunvieh |
| SAMEA4827651  | 16.5 | 426.1 | Original Braunvieh |

|               |      |       |                    |
|---------------|------|-------|--------------------|
| SAMEA4827645  | 16.3 | 418.2 | Original Braunvieh |
| SAMEA4827660  | 11.2 | 414.1 | Original Braunvieh |
| SAMEA4827650  | 11.7 | 421.2 | Original Braunvieh |
| SAMEA4644758  | 16.4 | 392.7 | Brown Swiss        |
| SAMEA4827666  | 12.2 | 423.1 | Original Braunvieh |
| SAMEA5159861  | 24.9 | 448.6 | Brown Swiss        |
| SAMEA5159862  | 27.0 | 443.4 | Brown Swiss        |
| SAMEA4827647  | 16.7 | 420.0 | Original Braunvieh |
| SAMEA4827674  | 13.7 | 416.9 | Original Braunvieh |
| SAMEA4827667  | 12.0 | 426.1 | Original Braunvieh |
| SAMEA5059742  | 3.6  | 426.4 | Original Braunvieh |
| SAMEA4827654  | 12.0 | 426.6 | Original Braunvieh |
| SAMEA4827665  | 14.1 | 417.6 | Original Braunvieh |
| SAMEA4827670  | 13.3 | 428.9 | Original Braunvieh |
| SAMEA4644740  | 19.5 | 397.3 | Original Braunvieh |
| SAMEA4644742  | 19.4 | 391.6 | Brown Swiss        |
| SAMEA4827648  | 12.2 | 426.4 | Original Braunvieh |
| SAMEA4827668  | 11.8 | 423.5 | Original Braunvieh |
| SAMEA4827673  | 11.3 | 423.0 | Original Braunvieh |
| SAMEA5159849  | 27.0 | 448.7 | Original Braunvieh |
| SAMEA4827672  | 11.4 | 433.0 | Original Braunvieh |
| SAMEA5159867  | 26.5 | 446.3 | Brown Swiss        |
| SAMEA5059748  | 4.8  | 419.9 | Original Braunvieh |
| SAMEA19318918 | 11.5 | 407.6 | Brown Swiss        |
| SAMEA5159869  | 27.6 | 451.8 | Brown Swiss        |
| SAMEA6272108  | 21.0 | 315.7 | Brown Swiss        |
| SAMEA5159870  | 32.6 | 451.3 | Brown Swiss        |
| SAMEA5059741  | 4.4  | 431.8 | Original Braunvieh |
| SAMEA5415498  | 21.9 | 367.3 | Brown Swiss        |
| SAMEA8565028  | 20.9 | 328.7 | Brown Swiss        |
| SAMEA5059750  | 3.7  | 424.8 | Original Braunvieh |
| SAMEA5059751  | 5.3  | 427.5 | Original Braunvieh |
| SAMEA5059747  | 4.4  | 414.7 | Original Braunvieh |
| SAMEA5059759  | 3.8  | 428.7 | Original Braunvieh |
| SAMEA5159850  | 28.4 | 453.0 | Original Braunvieh |
| SAMEA5059743  | 21.4 | 423.6 | Original Braunvieh |
| SAMEA5059754  | 3.3  | 420.3 | Original Braunvieh |
| SAMEA5059749  | 5.0  | 429.5 | Original Braunvieh |
| SAMEA5159872  | 28.0 | 449.3 | Brown Swiss        |
| SAMEA5059758  | 4.9  | 422.8 | Original Braunvieh |
| SAMEA5059752  | 3.7  | 425.3 | Original Braunvieh |
| SAMEA5059745  | 4.1  | 429.1 | Original Braunvieh |
| SAMEA5159885  | 25.3 | 487.6 | Brown Swiss        |
| SAMEA5059757  | 5.5  | 420.7 | Original Braunvieh |
| SAMEA5059746  | 4.1  | 424.2 | Original Braunvieh |
| SAMEA5159873  | 24.2 | 447.9 | Brown Swiss        |
| SAMEA5059756  | 6.4  | 409.4 | Original Braunvieh |
| SAMEA5059744  | 3.8  | 424.9 | Original Braunvieh |

|               |      |       |                         |
|---------------|------|-------|-------------------------|
| SAMEA5059755  | 7.2  | 417.1 | Original Braunvieh      |
| SAMEA4644756  | 18.0 | 416.5 | Brown Swiss             |
| SAMEA5159871  | 34.4 | 449.8 | Brown Swiss             |
| SAMEA5059753  | 4.0  | 424.6 | Original Braunvieh      |
| SAMEA5159848  | 23.0 | 450.5 | Original Braunvieh      |
| SAMEA6528893  | 14.2 | 398.1 | Original Braunvieh      |
| SAMEA5159868  | 26.8 | 455.9 | Brown Swiss             |
| SAMEA4644730  | 18.0 | 384.2 | Original Braunvieh      |
| SAMEA5159837  | 29.5 | 491.6 | Original Braunvieh      |
| SAMEA5159843  | 23.9 | 499.1 | Original Braunvieh      |
| SAMEA5714972  | 32.2 | 443.6 | Original Braunvieh      |
| SAMEA7015108  | 17.9 | 379.0 | Original Braunvieh      |
| SAMEA6528895  | 15.1 | 396.8 | Original Braunvieh      |
| SAMEA5714975  | 22.6 | 382.8 | Original Braunvieh      |
| SAMEA6528887  | 21.0 | 323.7 | Original Braunvieh      |
| SAMEA5564726  | 19.2 | 375.0 | Original Braunvieh      |
| SAMEA5564727  | 19.0 | 378.1 | Original Braunvieh      |
| SAMEA5415490  | 22.1 | 367.5 | Brown Swiss             |
| SAMEA5159874  | 33.7 | 450.6 | Brown Swiss             |
| SAMEA5159865  | 26.0 | 434.6 | Brown Swiss             |
| SAMEA5159863  | 23.7 | 441.2 | Brown Swiss             |
| SAMEA5159866  | 25.1 | 441.4 | Brown Swiss             |
| SAMEA4644735  | 15.1 | 375.4 | Brown Swiss             |
| SAMEA5159864  | 25.0 | 447.7 | Brown Swiss             |
| SAMEA19846918 | 14.7 | 313.8 | Holstein                |
| SAMEA7690217  | 17.6 | 342.5 | Charolais               |
| SAMEA33668668 | 19.3 | 412.4 | Chianina                |
| SAMEA7690197  | 18.2 | 346.4 | Chianina                |
| SAMEA7690231  | 17.7 | 357.9 | Chianina                |
| SAMEA5159835  | 38.4 | 456.5 | Chianina                |
| SAMEA8565052  | 20.7 | 351.2 | Chianina                |
| SAMEA8565051  | 21.5 | 334.3 | Chianina                |
| SAMEA8565050  | 22.5 | 349.1 | Chianina                |
| SAMEA7690198  | 17.9 | 349.4 | Chianina                |
| SAMEA32999668 | 21.6 | 414.4 | Chianina                |
| SAMEA7690230  | 19.3 | 363.2 | Chianina                |
| SAMEA8565023  | 20.9 | 329.6 | Chianina                |
| SAMEA32998168 | 29.1 | 394.0 | Chianina                |
| SAMEA7690196  | 17.3 | 338.8 | Belgian Blue x Holstein |
| SAMEA32989918 | 8.4  | 304.6 | Cika                    |
| SAMEA4560538  | 22.1 | 259.7 | Eringer                 |
| SAMEA19847668 | 19.3 | 262.9 | Brown Swiss             |
| SAMEA19848418 | 15.8 | 276.3 | Holstein                |
| SAMEA19849168 | 11.4 | 392.6 | Eringer                 |
| SAMEA5714967  | 28.6 | 471.2 | Eringer                 |
| SAMEA6528879  | 16.4 | 386.9 | Eringer                 |
| SAMEA6272106  | 16.0 | 312.0 | Brown Swiss             |
| SAMEA6272107  | 9.7  | 252.4 | Original Braunvieh      |

|              |      |       |                    |
|--------------|------|-------|--------------------|
| SAMEA6272109 | 7.5  | 259.8 | Original Braunvieh |
| SAMEA6272110 | 7.5  | 256.4 | Original Braunvieh |
| SAMEA6272111 | 29.8 | 334.2 | Brown Swiss        |
| SAMEA6272112 | 8.9  | 254.2 | Original Braunvieh |
| SAMEA6272113 | 9.9  | 256.9 | Original Braunvieh |
| SAMEA6272114 | 7.6  | 256.6 | Original Braunvieh |
| SAMEA6272115 | 8.1  | 257.6 | Original Braunvieh |
| SAMEA6272116 | 72.8 | 366.3 | Brown Swiss        |
| SAMEA6272118 | 19.1 | 389.3 | Original Braunvieh |
| SAMEA6272119 | 20.1 | 390.4 | Original Braunvieh |
| SAMEA6272120 | 19.0 | 396.5 | Original Braunvieh |
| SAMEA6272121 | 17.0 | 389.5 | Original Braunvieh |
| SAMEA6272122 | 18.8 | 397.0 | Original Braunvieh |
| SAMEA6272123 | 17.3 | 384.6 | Original Braunvieh |
| SAMEA6272124 | 19.2 | 395.6 | Original Braunvieh |
| SAMEA6272125 | 23.9 | 423.3 | Original Braunvieh |
| SAMEA6272126 | 63.7 | 382.5 | Original Braunvieh |
| SAMEA6272127 | 55.7 | 436.8 | Original Braunvieh |
| SAMEA6163175 | 11.3 | 489.5 | Brown Swiss        |
| SAMEA6163176 | 11.6 | 493.5 | Brown Swiss        |
| SAMEA6163177 | 10.5 | 483.2 | Brown Swiss        |
| SAMEA6163178 | 7.2  | 481.1 | Brown Swiss        |
| SAMEA6163179 | 8.8  | 476.5 | Brown Swiss        |
| SAMEA6163180 | 11.4 | 482.4 | Brown Swiss        |
| SAMEA6163181 | 10.0 | 497.5 | Brown Swiss        |
| SAMEA6163182 | 10.4 | 511.5 | Brown Swiss        |
| SAMEA6163183 | 9.9  | 499.7 | Brown Swiss        |
| SAMEA6163184 | 9.9  | 512.4 | Brown Swiss        |
| SAMEA6163186 | 17.6 | 297.3 | Brown Swiss        |
| SAMEA6163187 | 27.2 | 341.0 | Brown Swiss        |
| SAMEA6163188 | 33.4 | 354.7 | Brown Swiss        |
| SAMEA6163189 | 23.4 | 339.1 | Brown Swiss        |
| SAMEA6163190 | 16.1 | 322.0 | Brown Swiss        |
| SAMEA6163191 | 15.7 | 320.9 | Brown Swiss        |
| SAMEA6163192 | 15.4 | 299.9 | Brown Swiss        |
| SAMEA6163193 | 17.5 | 319.5 | Brown Swiss        |
| SAMEA6163194 | 17.4 | 312.9 | Brown Swiss        |
| SAMEA6163195 | 22.1 | 327.7 | Brown Swiss        |
| SAMEA6272082 | 19.0 | 436.8 | Original Braunvieh |
| SAMEA6272083 | 33.2 | 488.7 | Original Braunvieh |
| SAMEA6272084 | 12.2 | 423.5 | Original Braunvieh |
| SAMEA6272085 | 7.6  | 260.2 | Original Braunvieh |
| SAMEA6272086 | 11.8 | 257.2 | Original Braunvieh |
| SAMEA6272087 | 10.9 | 253.5 | Original Braunvieh |
| SAMEA6272088 | 10.3 | 259.3 | Original Braunvieh |
| SAMEA6272089 | 7.7  | 253.5 | Original Braunvieh |
| SAMEA6272090 | 10.0 | 255.9 | Original Braunvieh |
| SAMEA6272091 | 9.0  | 258.0 | Original Braunvieh |



|               |      |       |                    |
|---------------|------|-------|--------------------|
| SAMEA6272092  | 8.8  | 251.0 | Original Braunvieh |
| SAMEA6272093  | 10.6 | 258.4 | Original Braunvieh |
| SAMEA6272094  | 7.8  | 257.0 | Original Braunvieh |
| SAMEA6272095  | 26.1 | 318.3 | Brown Swiss        |
| SAMEA6272096  | 21.0 | 328.9 | Brown Swiss        |
| SAMEA6272097  | 11.0 | 317.7 | Brown Swiss        |
| SAMEA6272098  | 15.4 | 309.0 | Brown Swiss        |
| SAMEA6272099  | 12.6 | 335.3 | Brown Swiss        |
| SAMEA6272100  | 8.1  | 257.9 | Original Braunvieh |
| SAMEA6272101  | 10.6 | 321.4 | Brown Swiss        |
| SAMEA6272102  | 6.8  | 261.1 | Original Braunvieh |
| SAMEA6272103  | 8.6  | 252.5 | Original Braunvieh |
| SAMEA6272104  | 13.0 | 305.0 | Brown Swiss        |
| SAMEA6272105  | 34.8 | 326.2 | Brown Swiss        |
| SAMEA5714968  | 22.2 | 444.3 | Evolène            |
| SAMEA5714969  | 22.9 | 444.8 | Evolène            |
| SAMEA7015107  | 10.6 | 387.8 | Evolène            |
| SAMEA4051548  | 14.5 | 252.5 | Brown Swiss        |
| SAMEA19849918 | 15.8 | 250.4 | Scotish Highland   |
| SAMEA7015111  | 17.3 | 385.9 | Hereford           |
| SAMEA5159890  | 27.8 | 470.3 | Holstein           |
| SAMEA8565093  | 21.8 | 342.0 | Holstein           |
| SAMEA8565094  | 20.7 | 325.4 | Holstein           |
| SAMEA8565095  | 22.1 | 347.8 | Holstein           |
| SAMEA7690215  | 20.0 | 337.7 | Holstein           |
| SAMEA3682654  | 14.7 | 409.0 | Holstein           |
| SAMEA8565032  | 22.7 | 336.3 | Swiss Fleckvieh    |
| SAMEA8565030  | 21.7 | 340.0 | Holstein           |
| SAMEA4644737  | 17.4 | 399.6 | Holstein           |
| SAMEA7690214  | 17.7 | 342.3 | Holstein           |
| SAMEA4644729  | 18.8 | 399.7 | Holstein           |
| SAMEA7690232  | 18.6 | 310.0 | Holstein           |
| SAMEA4644732  | 18.3 | 397.0 | Holstein           |
| SAMEA4644731  | 17.6 | 401.3 | Holstein           |
| SAMEA19325668 | 22.7 | 402.9 | Holstein           |
| SAMEA5159854  | 33.3 | 467.4 | Holstein           |
| SAMEA6528904  | 23.1 | 383.9 | Holstein           |
| SAMEA6528896  | 11.8 | 433.8 | Swiss Fleckvieh    |
| SAMEA4644746  | 20.4 | 405.9 | Holstein           |
| SAMEA8565016  | 24.7 | 460.1 | Holstein           |
| SAMEA4644736  | 20.9 | 389.7 | Holstein           |
| SAMEA5415500  | 18.4 | 368.0 | Holstein           |
| SAMEA4560543  | 9.5  | 258.5 | Holstein           |
| SAMEA5159879  | 27.7 | 446.2 | Holstein           |
| SAMEA4644753  | 17.0 | 390.7 | Holstein           |
| SAMEA3682653  | 17.0 | 417.8 | Holstein           |
| SAMEA5415483  | 30.9 | 376.1 | Holstein           |
| SAMEA5415484  | 24.1 | 364.4 | Holstein           |

|               |      |       |          |
|---------------|------|-------|----------|
| SAMEA4644738  | 17.9 | 385.4 | Holstein |
| SAMEA7690213  | 17.3 | 301.2 | Holstein |
| SAMEA7015110  | 21.1 | 375.0 | Holstein |
| SAMEA5159857  | 25.6 | 466.5 | Holstein |
| SAMEA4644748  | 17.1 | 395.7 | Holstein |
| SAMEA8565005  | 25.0 | 465.8 | Holstein |
| SAMEA5159855  | 39.2 | 461.0 | Holstein |
| SAMEA19309918 | 20.7 | 415.9 | Holstein |
| SAMEA5415503  | 24.3 | 445.9 | Holstein |
| SAMEA5159859  | 25.6 | 433.3 | Holstein |
| SAMEA5159860  | 17.6 | 425.0 | Holstein |
| SAMEA4644733  | 18.7 | 391.2 | Holstein |
| SAMEA4644760  | 14.4 | 441.4 | Holstein |
| SAMEA8565025  | 20.8 | 337.4 | Holstein |
| SAMEA5159840  | 26.9 | 483.7 | Holstein |
| SAMEA5415501  | 19.6 | 377.3 | Holstein |
| SAMEA5415502  | 15.1 | 370.8 | Holstein |
| SAMEA19310668 | 17.0 | 414.4 | Holstein |
| SAMEA8565027  | 35.3 | 331.2 | Holstein |
| SAMEA6528905  | 24.7 | 379.3 | Holstein |
| SAMEA7690265  | 16.8 | 315.1 | Holstein |
| SAMEA4644761  | 17.6 | 408.2 | Holstein |
| SAMEA7690212  | 17.6 | 342.8 | Holstein |
| SAMEA5714977  | 20.8 | 314.1 | Holstein |
| SAMEA5714978  | 17.2 | 311.0 | Holstein |
| SAMEA8565064  | 21.6 | 351.2 | Holstein |
| SAMEA7690259  | 17.6 | 318.0 | Holstein |
| SAMEA8565067  | 21.4 | 349.0 | Holstein |
| SAMEA7690256  | 17.7 | 305.5 | Holstein |
| SAMEA7690258  | 21.3 | 343.6 | Holstein |
| SAMEA8565079  | 24.0 | 344.0 | Holstein |
| SAMEA8565040  | 22.5 | 354.9 | Holstein |
| SAMEA8565071  | 22.1 | 360.7 | Holstein |
| SAMEA8565058  | 20.2 | 334.7 | Holstein |
| SAMEA7690254  | 18.3 | 309.6 | Holstein |
| SAMEA7690261  | 19.8 | 305.0 | Holstein |
| SAMEA7690253  | 17.1 | 300.4 | Holstein |
| SAMEA8565076  | 21.1 | 345.2 | Holstein |
| SAMEA7690255  | 18.4 | 319.6 | Holstein |
| SAMEA8565091  | 16.1 | 319.5 | Holstein |
| SAMEA8565061  | 22.6 | 347.7 | Holstein |
| SAMEA7690260  | 18.1 | 308.5 | Holstein |
| SAMEA8565073  | 21.1 | 333.6 | Holstein |
| SAMEA7690257  | 17.3 | 315.5 | Holstein |
| SAMEA19322668 | 13.8 | 432.4 | Holstein |
| SAMEA7690264  | 16.9 | 293.9 | Holstein |
| SAMEA7690262  | 16.8 | 282.6 | Holstein |
| SAMEA8565080  | 19.7 | 333.7 | Holstein |

|               |      |       |          |
|---------------|------|-------|----------|
| SAMEA8565038  | 21.2 | 351.9 | Holstein |
| SAMEA7690266  | 19.4 | 287.0 | Holstein |
| SAMEA8565042  | 22.5 | 325.4 | Holstein |
| SAMEA8565074  | 22.5 | 332.6 | Holstein |
| SAMEA7690267  | 17.9 | 284.3 | Holstein |
| SAMEA8565092  | 21.3 | 329.1 | Holstein |
| SAMEA8565041  | 22.4 | 340.8 | Holstein |
| SAMEA8565062  | 20.6 | 327.5 | Holstein |
| SAMEA8565057  | 20.0 | 363.0 | Holstein |
| SAMEA8565077  | 24.2 | 324.1 | Holstein |
| SAMEA8565084  | 22.3 | 336.8 | Holstein |
| SAMEA8565065  | 22.2 | 336.7 | Holstein |
| SAMEA8565059  | 14.4 | 322.9 | Holstein |
| SAMEA7690234  | 17.8 | 348.2 | Holstein |
| SAMEA7690223  | 17.8 | 343.8 | Holstein |
| SAMEA6528907  | 23.8 | 380.3 | Holstein |
| SAMEA6528908  | 18.8 | 372.1 | Holstein |
| SAMEA7690200  | 18.5 | 339.1 | Holstein |
| SAMEA7690238  | 18.4 | 302.3 | Holstein |
| SAMEA7015113  | 22.3 | 376.6 | Holstein |
| SAMEA7015115  | 17.1 | 385.3 | Holstein |
| SAMEA8565014  | 20.0 | 467.2 | Holstein |
| SAMEA8565000  | 22.8 | 446.2 | Holstein |
| SAMEA6528909  | 22.1 | 366.1 | Holstein |
| SAMEA33004168 | 16.5 | 399.9 | Holstein |
| SAMEA5159878  | 31.4 | 446.7 | Holstein |
| SAMEA5159884  | 25.6 | 450.7 | Holstein |
| SAMEA7690239  | 18.1 | 297.8 | Holstein |
| SAMEA7690235  | 22.0 | 332.3 | Holstein |
| SAMEA7015112  | 17.6 | 384.5 | Holstein |
| SAMEA7690228  | 18.4 | 338.9 | Holstein |
| SAMEA19318168 | 16.2 | 452.5 | Holstein |
| SAMEA6528906  | 27.0 | 380.4 | Holstein |
| SAMEA19317418 | 16.9 | 459.6 | Holstein |
| SAMEA5159842  | 23.5 | 460.8 | Holstein |
| SAMEA8565009  | 23.1 | 470.1 | Holstein |
| SAMEA7690201  | 19.6 | 332.8 | Holstein |
| SAMEA7690263  | 17.2 | 277.2 | Holstein |
| SAMEA8565053  | 22.1 | 342.9 | Holstein |
| SAMEA33000418 | 23.4 | 401.7 | Holstein |
| SAMEA5160152  | 28.1 | 439.2 | Holstein |
| SAMEA5159839  | 28.3 | 470.3 | Holstein |
| SAMEA5159841  | 33.1 | 449.5 | Holstein |
| SAMEA5159844  | 26.5 | 480.6 | Holstein |
| SAMEA6528899  | 16.0 | 395.8 | Holstein |
| SAMEA7690208  | 17.4 | 350.1 | Holstein |
| SAMEA7690210  | 19.4 | 348.5 | Holstein |
| SAMEA7690236  | 17.8 | 329.9 | Holstein |

|               |      |       |          |
|---------------|------|-------|----------|
| SAMEA7690237  | 19.6 | 274.4 | Holstein |
| SAMEA7690241  | 17.6 | 284.2 | Holstein |
| SAMEA7690245  | 18.7 | 288.2 | Holstein |
| SAMEA7690249  | 19.6 | 307.6 | Holstein |
| SAMEA7690251  | 17.4 | 364.2 | Holstein |
| SAMEA7690252  | 18.0 | 310.6 | Holstein |
| SAMEA8565060  | 16.6 | 262.1 | Holstein |
| SAMEA8565063  | 20.5 | 338.0 | Holstein |
| SAMEA8565085  | 20.8 | 320.0 | Holstein |
| SAMEA19311418 | 12.6 | 418.8 | Holstein |
| SAMEA19316668 | 14.9 | 458.5 | Holstein |
| SAMEA19320418 | 22.7 | 401.5 | Holstein |
| SAMEA19321168 | 14.5 | 330.3 | Holstein |
| SAMEA19321918 | 11.9 | 425.0 | Holstein |
| SAMEA4644759  | 17.8 | 425.4 | Holstein |
| SAMEA4644751  | 12.3 | 422.6 | Holstein |
| SAMEA7690222  | 18.1 | 311.8 | Holstein |
| SAMEA7690242  | 19.3 | 298.4 | Holstein |
| SAMEA7690243  | 18.5 | 304.6 | Holstein |
| SAMEA7690244  | 19.8 | 322.2 | Holstein |
| SAMEA7690246  | 20.2 | 334.7 | Holstein |
| SAMEA7690247  | 18.9 | 326.2 | Holstein |
| SAMEA7690248  | 20.4 | 328.2 | Holstein |
| SAMEA8565068  | 22.2 | 339.1 | Holstein |
| SAMEA8565069  | 22.5 | 329.6 | Holstein |
| SAMEA8565070  | 25.7 | 345.8 | Holstein |
| SAMEA8565075  | 20.6 | 288.2 | Holstein |
| SAMEA8565078  | 22.0 | 301.0 | Holstein |
| SAMEA8565081  | 21.7 | 349.7 | Holstein |
| SAMEA8565082  | 22.3 | 306.3 | Holstein |
| SAMEA8565086  | 19.6 | 326.2 | Holstein |
| SAMEA8565089  | 22.5 | 296.4 | Holstein |
| SAMEA19312168 | 10.6 | 406.1 | Holstein |
| SAMEA8565026  | 17.0 | 306.3 | Holstein |
| SAMEA5415492  | 18.3 | 376.8 | Holstein |
| SAMEA5415494  | 16.8 | 379.8 | Holstein |
| SAMEA5415496  | 17.9 | 363.6 | Holstein |
| SAMEA8565039  | 19.8 | 322.6 | Holstein |
| SAMEA8565056  | 21.8 | 322.7 | Holstein |
| SAMEA8565066  | 24.7 | 339.5 | Holstein |
| SAMEA8565072  | 24.2 | 342.5 | Holstein |
| SAMEA8565087  | 21.5 | 330.0 | Holstein |
| SAMEA8565088  | 20.3 | 261.2 | Holstein |
| SAMEA8565090  | 19.1 | 224.9 | Holstein |
| SAMEA6528897  | 18.1 | 396.6 | Holstein |
| SAMEA6528902  | 25.8 | 342.0 | Holstein |
| SAMEA6528903  | 20.6 | 363.9 | Holstein |
| SAMEA7690209  | 18.9 | 347.2 | Holstein |

|               |      |       |                  |
|---------------|------|-------|------------------|
| SAMEA7690211  | 17.2 | 344.0 | Holstein         |
| SAMEA7690225  | 18.5 | 281.0 | Holstein         |
| SAMEA7690226  | 19.3 | 345.1 | Holstein         |
| SAMEA7690227  | 19.8 | 315.6 | Holstein         |
| SAMEA7690250  | 18.8 | 375.9 | Holstein         |
| SAMEA7690207  | 17.5 | 343.5 | Holstein         |
| SAMEA5159880  | 33.5 | 450.0 | Holstein         |
| SAMEA5159833  | 23.0 | 452.8 | Holstein         |
| SAMEA7690224  | 17.5 | 338.7 | Holstein         |
| SAMEA7690233  | 18.6 | 305.9 | Holstein         |
| SAMEA5159882  | 29.6 | 446.9 | Holstein         |
| SAMEA5159881  | 20.8 | 446.2 | Holstein         |
| SAMEA5159883  | 28.3 | 441.9 | Holstein         |
| SAMN08612501  | 27.1 | 454.9 | Jersey           |
| SAMN08612533  | 13.2 | 509.1 | Jersey           |
| SAMEA5159763  | 17.8 | 425.5 | Limousin         |
| SAMEA7690229  | 17.5 | 332.2 | Limousin         |
| SAMEA8565043  | 21.3 | 333.1 | Limousin         |
| SAMEA7690204  | 17.6 | 333.2 | Limousin         |
| SAMEA7690205  | 17.8 | 342.6 | Limousin         |
| SAMEA7690206  | 17.6 | 343.6 | Limousin         |
| SAMEA3390167  | 15.4 | 189.9 | Montbeliarde     |
| SAMEA3390170  | 17.6 | 299.3 | Montbeliarde     |
| SAMEA32980918 | 17.3 | 407.6 | Brown Swiss      |
| SAMEA32981668 | 15.7 | 420.4 | Brown Swiss      |
| SAMEA32982418 | 13.5 | 412.1 | Brown Swiss      |
| SAMEA3390189  | 22.3 | 233.8 | Normande         |
| SAMEA3390191  | 26.8 | 249.6 | Normande         |
| SAMEA33001168 | 17.1 | 401.4 | Normande         |
| SAMEA2422242  | 13.1 | 351.0 | Romagnola        |
| SAMEA5159836  | 27.7 | 488.6 | Piemontese       |
| SAMEA19324918 | 14.2 | 384.1 | Piemontese       |
| SAMEA33001918 | 13.8 | 388.1 | Piemontese       |
| SAMEA5159845  | 32.8 | 447.7 | Pinzgauer        |
| SAMEA19852168 | 18.0 | 244.7 | Simmental        |
| SAMEA19852918 | 37.2 | 219.2 | Simmental        |
| SAMEA19853668 | 19.6 | 284.2 | Simmental        |
| SAMEA3706829  | 12.1 | 400.0 | Danish Red Dairy |
| SAMEA3706828  | 14.8 | 387.1 | Danish Red Dairy |
| SAMEA4644767  | 16.7 | 429.8 | Holstein         |
| SAMEA8565007  | 20.3 | 472.4 | Holstein         |
| SAMEA8565001  | 24.7 | 452.7 | Holstein         |
| SAMEA8565015  | 17.9 | 458.7 | Holstein         |
| SAMEA8565011  | 20.5 | 484.4 | Holstein         |
| SAMEA8565002  | 22.6 | 472.6 | Holstein         |
| SAMEA8565012  | 17.9 | 471.3 | Holstein         |
| SAMEA8565013  | 18.8 | 476.3 | Holstein         |
| SAMEA8564999  | 20.7 | 448.5 | Holstein         |

|               |      |       |                        |
|---------------|------|-------|------------------------|
| SAMEA5160021  | 21.3 | 464.9 | Holstein               |
| SAMEA8565008  | 18.1 | 464.9 | Holstein               |
| SAMEA8565010  | 31.4 | 472.9 | Holstein               |
| SAMEA4644726  | 18.7 | 402.5 | Holstein               |
| SAMEA8564998  | 41.6 | 450.4 | Holstein               |
| SAMEA8565006  | 26.9 | 475.8 | Holstein               |
| SAMEA8565003  | 31.7 | 466.5 | Holstein               |
| SAMEA8565004  | 20.9 | 468.5 | Holstein               |
| SAMEA19864168 | 12.7 | 327.0 | Holstein               |
| SAMEA19864918 | 10.1 | 315.8 | Brown Swiss            |
| SAMEA19865668 | 16.3 | 299.3 | Holstein               |
| SAMEA19866418 | 12.4 | 254.1 | Limousin x Holstein    |
| SAMEA19867168 | 10.1 | 265.5 | Holstein               |
| SAMEA19867918 | 11.5 | 300.3 | Limousin               |
| SAMEA19868668 | 15.1 | 288.7 | Simmental              |
| SAMEA19869418 | 12.5 | 355.2 | Simmental              |
| SAMEA19870168 | 13.6 | 351.8 | Simmental              |
| SAMEA19871668 | 12.1 | 345.9 | Holstein               |
| SAMEA3209361  | 21.4 | 248.1 | Pezzata Rossa Italiana |
| SAMEA3113485  | 19.1 | 375.8 | Holstein               |
| SAMEA19874668 | 18.8 | 364.2 | Holstein               |
| SAMEA32983168 | 14.8 | 378.6 | Holstein               |
| SAMEA32983918 | 13.3 | 396.5 | Holstein               |
| SAMEA32984668 | 18.0 | 375.3 | Holstein               |
| SAMEA33669418 | 36.0 | 365.3 | Simmental              |
| SAMEA19875418 | 12.5 | 372.7 | Simmental              |
| SAMEA32985418 | 14.6 | 383.9 | Limousin               |
| SAMEA19877668 | 13.8 | 337.8 | Simmental              |
| SAMEA32988418 | 25.2 | 416.2 | Romagnola              |
| SAMEA32990668 | 18.1 | 364.6 | Holstein               |
| SAMEA32992918 | 15.0 | 363.8 | Limousin x Brown Swiss |
| SAMEA32986918 | 16.7 | 404.4 | Holstein               |
| SAMEA32991418 | 13.6 | 362.3 | Holstein               |
| SAMEA32992168 | 14.2 | 388.6 | Holstein               |
| SAMEA3706814  | 14.2 | 351.6 | Holstein               |
| SAMEA3706815  | 14.9 | 420.4 | Holstein               |
| SAMEA3706816  | 15.1 | 421.2 | Holstein               |
| SAMEA32987668 | 9.6  | 455.9 | Romagnola              |
| SAMEA32989168 | 18.9 | 433.9 | Romagnola              |
| SAMEA32995168 | 22.1 | 363.7 | Holstein               |
| SAMEA32995918 | 28.2 | 388.2 | Holstein               |
| SAMEA32996668 | 26.6 | 414.5 | Holstein               |
| SAMEA2821387  | 13.1 | 247.9 | Charolais              |
| SAMEA2821386  | 15.5 | 332.0 | Hereford               |
| SAMEA32997418 | 15.7 | 409.4 | Brown Swiss            |
| SAMEA3706830  | 15.1 | 392.2 | Holstein               |
| SAMEA3706827  | 14.2 | 392.9 | Danish Red Dairy       |
| SAMEA8565047  | 21.5 | 344.4 | Romagnola              |

|              |      |       |                      |
|--------------|------|-------|----------------------|
| SAMEA8565022 | 18.5 | 333.0 | Romagnola            |
| SAMEA8565021 | 22.0 | 327.6 | Romagnola            |
| SAMEA6528884 | 24.5 | 378.6 | Romagnola            |
| SAMEA8565049 | 21.6 | 340.2 | Romagnola            |
| SAMEA8565020 | 20.8 | 328.3 | Romagnola            |
| SAMEA6528883 | 22.7 | 373.5 | Romagnola            |
| SAMEA7690202 | 17.9 | 326.0 | Romagnola            |
| SAMEA7015114 | 18.1 | 381.4 | Romagnola            |
| SAMEA8565046 | 17.8 | 301.6 | Romagnola            |
| SAMEA6528882 | 20.9 | 374.4 | Romagnola            |
| SAMEA8565017 | 25.5 | 332.7 | Romagnola            |
| SAMEA8565019 | 17.0 | 333.8 | Romagnola            |
| SAMEA6528881 | 21.1 | 371.8 | Romagnola            |
| SAMEA7690203 | 19.2 | 326.1 | Romagnola            |
| SAMEA8565018 | 17.7 | 328.0 | Romagnola            |
| SAMEA6528885 | 22.5 | 384.0 | Romagnola            |
| SAMEA8565024 | 20.8 | 294.5 | Romagnola            |
| SAMEA8565048 | 21.8 | 323.2 | Romagnola            |
| SAMEA7690195 | 17.4 | 328.5 | Romagnola            |
| SAMN10598557 | 40.1 | 380.9 | Hereford             |
| SAMN10598558 | 34.6 | 406.0 | Hereford             |
| SAMEA5714970 | 18.9 | 378.0 | Scotish Highland     |
| SAMEA5159831 | 17.4 | 461.1 | Scotish Highland     |
| SAMEA5159830 | 24.2 | 469.5 | Scotish Highland     |
| SAMEA5159829 | 16.0 | 457.9 | Scotish Highland     |
| SAMEA7690199 | 20.8 | 328.9 | Simmental            |
| SAMEA5564718 | 18.6 | 376.0 | Simmental            |
| SAMEA3706826 | 11.0 | 416.8 | Simmental            |
| SAMEA7690220 | 19.0 | 350.1 | Simmental            |
| SAMEA5564717 | 20.3 | 381.7 | Simmental            |
| SAMEA5566449 | 22.8 | 380.1 | Simmental            |
| SAMEA8565045 | 21.7 | 337.8 | Simmental            |
| SAMEA8565031 | 21.5 | 348.6 | Simmental            |
| SAMEA5564719 | 24.7 | 376.8 | Simmental            |
| SAMEA8565037 | 23.4 | 352.6 | Simmental            |
| SAMEA5159856 | 28.7 | 428.3 | Holstein             |
| SAMEA5564720 | 26.7 | 386.6 | Simmental            |
| SAMEA7690219 | 17.5 | 343.2 | Simmental            |
| SAMEA5159762 | 17.2 | 406.2 | Simmental x Holstein |
| SAMEA5159858 | 25.2 | 382.9 | Holstein             |
| SAMEA5564722 | 23.6 | 362.5 | Simmental            |
| SAMEA5564725 | 23.4 | 376.4 | Simmental            |
| SAMEA7690240 | 19.0 | 305.4 | Simmental            |
| SAMEA5160153 | 33.9 | 458.0 | Simmental            |
| SAMEA6528880 | 17.5 | 463.5 | Simmental            |
| SAMEA4644747 | 15.4 | 414.3 | Holstein             |
| SAMEA5564715 | 25.3 | 444.8 | Simmental            |
| SAMEA5564713 | 19.1 | 362.2 | Simmental            |

|               |      |       |               |
|---------------|------|-------|---------------|
| SAMEA5564714  | 18.2 | 373.5 | Simmental     |
| SAMEA5415499  | 15.8 | 371.5 | Simmental     |
| SAMEA5159832  | 35.0 | 467.9 | Holstein      |
| SAMEA5564711  | 20.8 | 440.9 | Simmental     |
| SAMEA5564710  | 17.3 | 437.0 | Simmental     |
| SAMEA5564724  | 22.5 | 370.2 | Simmental     |
| SAMEA8565055  | 7.6  | 328.2 | Simmental     |
| SAMEA5564723  | 26.7 | 371.8 | Simmental     |
| SAMEA5564721  | 21.7 | 373.4 | Simmental     |
| SAMEA7015109  | 18.9 | 385.4 | Simmental     |
| SAMEA6528910  | 21.4 | 383.7 | Simmental     |
| SAMEA8565044  | 22.0 | 341.0 | Simmental     |
| SAMEA4644744  | 22.1 | 406.4 | Simmental     |
| SAMEA5564712  | 22.2 | 484.0 | Simmental     |
| SAMEA4644745  | 18.7 | 374.7 | Simmental     |
| SAMEA5159876  | 28.2 | 450.1 | Simmental     |
| SAMEA5159877  | 30.3 | 449.3 | Simmental     |
| SAMEA5415487  | 35.0 | 355.4 | Simmental     |
| SAMEA33004918 | 21.4 | 410.2 | Simmental     |
| SAMEA19309168 | 14.7 | 416.1 | Simmental     |
| SAMEA19876168 | 11.2 | 444.1 | Romagnola     |
| SAMEA19876918 | 13.7 | 415.2 | Holstein      |
| SAMEA3682652  | 18.3 | 375.9 | Tyrolean Grey |
| SAMEA5159889  | 24.1 | 424.7 | Tyrolean Grey |
| SAMEA7015117  | 18.1 | 387.3 | Grey cattle   |
| SAMEA5716181  | 17.4 | 427.4 | Tyrolean Grey |
| SAMEA5564737  | 22.6 | 358.0 | Tyrolean Grey |
| SAMEA7015121  | 15.6 | 380.9 | Grey cattle   |
| SAMEA5159888  | 24.9 | 425.7 | Tyrolean Grey |
| SAMEA7015116  | 18.8 | 383.1 | Grey cattle   |
| SAMEA5564730  | 25.5 | 447.8 | Tyrolean Grey |
| SAMEA5714980  | 18.8 | 429.1 | Tyrolean Grey |
| SAMEA5564731  | 19.4 | 418.2 | Tyrolean Grey |
| SAMEA5564729  | 18.8 | 453.8 | Tyrolean Grey |
| SAMEA5564735  | 15.8 | 370.0 | Tyrolean Grey |
| SAMEA5159887  | 25.3 | 419.3 | Tyrolean Grey |
| SAMEA5564734  | 24.4 | 369.3 | Tyrolean Grey |
| SAMEA7015118  | 16.4 | 371.6 | Grey cattle   |
| SAMEA7015119  | 25.2 | 392.8 | Grey cattle   |
| SAMEA7015120  | 19.2 | 384.8 | Grey cattle   |
| SAMEA5564732  | 23.4 | 452.1 | Tyrolean Grey |
| SAMEA5564733  | 18.9 | 435.2 | Tyrolean Grey |
| SAMEA5714981  | 17.4 | 430.7 | Tyrolean Grey |
| SAMEA5564736  | 18.9 | 434.1 | Tyrolean Grey |
| SAMEA2357050  | 12.7 | 279.2 | Tyrolean Grey |
| SAMEA7589755  | 23.4 | 389.6 | Grey cattle   |
| SAMEA7589756  | 21.3 | 436.0 | Grey cattle   |
| SAMEA7589757  | 24.5 | 421.6 | Grey cattle   |



|               |      |       |                             |
|---------------|------|-------|-----------------------------|
| SAMEA7589758  | 26.1 | 427.9 | Grey cattle                 |
| SAMEA7589759  | 24.6 | 422.6 | Grey cattle                 |
| SAMEA7589760  | 26.6 | 472.4 | Grey cattle                 |
| SAMEA7589761  | 20.0 | 431.3 | Grey cattle                 |
| SAMEA7589762  | 27.4 | 398.7 | Grey cattle                 |
| SAMEA7589763  | 24.3 | 426.5 | Grey cattle                 |
| SAMEA5159846  | 43.8 | 443.2 | Tux-Zillertal               |
| SAMN08473804  | 48.7 | 426.1 | Angus                       |
| SAMN09379712  | 25.7 | 550.4 | Charolais                   |
| SAMN09510423  | 39.0 | 497.9 | Norwegian Red               |
| SAMEA8565083  | 21.4 | 339.5 | unknown                     |
| SAMEA8565054  | 20.3 | 343.1 | Holstein x unknown          |
| SAMEA6528901  | 8.9  | 392.9 | Danish Red Dairy            |
| SAMEA5415493  | 21.2 | 374.2 | Belgium Blue x Holstein     |
| SAMEA5415495  | 24.2 | 357.8 | Belgium Blue x Holstein     |
| SAMEA5415497  | 21.5 | 366.6 | Belgium Blue x Holstein     |
| SAMEA5714973  | 17.6 | 448.5 | Angus x Simmental           |
| SAMEA3706824  | 13.0 | 410.1 | Simmental x Angus           |
| SAMEA7690218  | 19.0 | 343.0 | Limousin x Simmental        |
| SAMEA19872418 | 28.5 | 384.5 | Piemontese x Normande       |
| SAMEA7690221  | 17.6 | 346.3 | Limousin x Simmental        |
| SAMEA5159851  | 25.7 | 461.1 | Australian Lowline          |
| SAMEA6528898  | 19.0 | 388.5 | Belgian Blue x Holstein     |
| SAMEA6528900  | 22.4 | 379.9 | Danish Red Dairy x Holstein |

**Supplementary Table S3: Comprehensive list including all haplotypes of interest and detailed information.**

| name <sup>a</sup>                     | analysis | chr | start <sup>b</sup> | end <sup>b</sup> | N SNPs | N unique haplotypes | N genotyped animals | observed number of homozygous carrier | expected number of homozygous carrier | N heterozygous observed (expected) |
|---------------------------------------|----------|-----|--------------------|------------------|--------|---------------------|---------------------|---------------------------------------|---------------------------------------|------------------------------------|
| <b>HH18</b>                           | pgp      | 1   | 103019622          | 104375908        | 50     | 1989                | 52423               | 7                                     | 30                                    | 2488 (2442)                        |
| <b>HH19<sup>c</sup></b>               | pgp      | 1   | 139873827          | 140642688        | 50     | 2078                | 52547               | 12                                    | 47                                    | 3133 (3062)                        |
| <b>HH20</b>                           | pgp      | 2   | 134476837          | 135147756        | 50     | 4246                | 52071               | 1                                     | 14                                    | 1728 (1701)                        |
| <b>HH21</b>                           | trio     | 7   | 7871925            | 10432630         | 50     | 3972                | 52577               | 0                                     | 157                                   | 5746 (5432)                        |
| <b>(175.5 and 07.126)<sup>d</sup></b> | pgp      | 7   | 7871925            | 10432630         | 50     | 3972                | 52577               | 0                                     | 157                                   | 5746 (5432)                        |
| <b>HH22</b>                           | pgp      | 7   | 93581943           | 94642456         | 50     | 2546                | 52550               | 2                                     | 16                                    | 1812 (1785)                        |
| <b>HH23</b>                           | pgp      | 8   | 15561949           | 16862751         | 50     | 4124                | 52569               | 5                                     | 25                                    | 2298 (2257)                        |
| <b>HH24</b>                           | pgp      | 8   | 66699044           | 68005926         | 50     | 2449                | 52693               | 2                                     | 59                                    | 3533 (3418)                        |
| <b>HH3<sup>e</sup></b>                | trio     | 8   | 90958661           | 92084831         | 50     | 1735                | 52662               | 0                                     | 10                                    | 1455 (1435)                        |
|                                       | pgp      | 8   | 90958661           | 92084831         | 50     | 1735                | 52662               | 0                                     | 10                                    | 1455 (1435)                        |
| <b>HH5<sup>f</sup></b>                | trio     | 9   | 90928417           | 91823561         | 50     | 2696                | 52304               | 0                                     | 30                                    | 2505 (2445)                        |
|                                       | pgp      | 9   | 90928417           | 91823561         | 50     | 2696                | 52304               | 0                                     | 30                                    | 2505 (2445)                        |
| <b>HH25</b>                           | trio     | 10  | 86876435           | 87772797         | 50     | 2378                | 52623               | 5                                     | 20                                    | 2048 (2018)                        |
| <b>HH26</b>                           | pgp      | 11  | 4531428            | 5362251          | 50     | 3346                | 52669               | 7                                     | 34                                    | 2678 (2623)                        |
| <b>HH27</b>                           | pgp      | 13  | 7083081            | 8296886          | 50     | 2585                | 52336               | 2                                     | 17                                    | 1906 (1875)                        |
| <b>HH28</b>                           | pgp      | 14  | 24591331           | 24827448         | 50     | 735                 | 52505               | 3                                     | 20                                    | 2068 (2033)                        |
| <b>HH29</b>                           | pgp      | 14  | 58128474           | 59238055         | 50     | 2844                | 52376               | 14                                    | 52                                    | 3259 (3184)                        |
| <b>HH13<sup>g</sup></b>               | trio     | 18  | 60931980           | 62100899         | 50     | 2766                | 52778               | 1                                     | 17                                    | 1911 (1878)                        |
|                                       | pgp      | 18  | 62070448           | 63044863         | 50     | 4891                | 52636               | 2                                     | 22                                    | 2162 (2121)                        |
| <b>HH30</b>                           | trio     | 21  | 7844296            | 8671178          | 50     | 2375                | 52720               | 1                                     | 24                                    | 2246 (2200)                        |
| <b>HH31</b>                           | pgp      | 22  | 59811442           | 60703550         | 50     | 3372                | 52208               | 3                                     | 17                                    | 1875 (1847)                        |

|             |      |    |          |          |    |      |       |    |    |             |
|-------------|------|----|----------|----------|----|------|-------|----|----|-------------|
| <b>HH32</b> | pgp  | 23 | 32773236 | 33726454 | 50 | 3627 | 52393 | 1  | 13 | 1638 (1614) |
|             | trio | 23 | 33544569 | 34948131 | 50 | 4519 | 52402 | 0  | 13 | 1623 (1598) |
| <b>HH33</b> | pgp  | 24 | 44692769 | 45677988 | 50 | 2517 | 52496 | 14 | 42 | 2933 (2877) |
| <b>HH34</b> | pgp  | 25 | 36165207 | 37329782 | 50 | 3222 | 52619 | 0  | 18 | 1959 (1923) |
|             | trio | 25 | 36165207 | 37329782 | 50 | 3222 | 52619 | 0  | 18 | 1959 (1923) |
| <b>HH35</b> | pgp  | 26 | 3358717  | 4234871  | 50 | 2647 | 52604 | 7  | 31 | 2552 (2503) |
| <b>HH36</b> | pgp  | 28 | 28541274 | 29736156 | 50 | 3054 | 52358 | 2  | 15 | 1784 (1757) |
|             | trio | 28 | 29731696 | 30877496 | 50 | 2572 | 52345 | 2  | 26 | 2348 (2299) |
| <b>HH37</b> | pgp  | 28 | 40347735 | 41271169 | 50 | 3087 | 52508 | 6  | 66 | 3705 (3585) |
| <b>HH38</b> | trio | 29 | 14242732 | 15316961 | 50 | 3290 | 52564 | 0  | 14 | 1740 (1711) |

<sup>a</sup> HH meaning Holstein Haplotype

<sup>b</sup> according to the reference sequence ARS-UCD1.2 (National Center for Biotechnology Information, 2018a)

<sup>c</sup> haplotype co-localises with previously described haplotype HHB by Shuster *et al.* (1992) and Cole *et al.* (2018)

<sup>d</sup> haplotype previously described by VanRaden *et al.* (2011) and Sahana *et al.* (2013)

<sup>e</sup> haplotype previously described by VanRaden *et al.* (2011), McClure *et al.* (2013), Sahana *et al.* (2013) and Wu *et al.* (2019)

<sup>f</sup> haplotype previously described by Schütz *et al.* (2016) and Fritz *et al.* (2018)

<sup>g</sup> haplotype previously described by Fritz *et al.* (2013)

| allele<br>frequency<br>% | Haplotype                                              | p-value  | p-value<br>adjusted to<br>BY | length Mb |
|--------------------------|--------------------------------------------------------|----------|------------------------------|-----------|
| 2.39                     | H=12122121211111212122211211221122121112121211121112   | 7.52E-07 | 1.78E-04                     | 1.36      |
| 3.00                     | H=22111122221211221211221221122112122111211121212112   | 7.72E-10 | 4.08E-07                     | 0.77      |
| 1.66                     | H=2212111112221122112111212122112112111121211122211    | 1.18E-05 | 1.98E-03                     | 0.67      |
| 5.46                     | H=22212212212122222211212222122121212221112221222112   | 1.10E-72 | 9.96E-70                     | 2.56      |
| 5.46                     | H=22212212212122222211212222122121212221112221222112   | 1.10E-72 | 2.51E-69                     | 2.56      |
| 1.73                     | H=21122221111222222112122122211122122212211111112111   | 2.93E-05 | 4.03E-03                     | 1.06      |
| 2.20                     | H=2212111222112112222122121121222222221111112211211    | 1.28E-06 | 2.82E-04                     | 1.30      |
| 3.36                     | H=122222122122122121211212211112122111212112221222     | 7.19E-24 | 1.04E-20                     | 1.31      |
| 1.38                     | H=11221112112112122112111111122112212221211212211212   | 7.47E-05 | 2.10E-03                     | 1.13      |
| 1.38                     | H=11221112112112122112111111122112212221211212211212   | 7.47E-05 | 7.84E-03                     | 1.13      |
| 2.39                     | H=1111111212221211212121222212221222222222222221221211 | 7.66E-14 | 2.86E-11                     | 0.90      |
| 2.39                     | H=1111111212221211212121222212221222222222222221221211 | 7.66E-14 | 5.84E-11                     | 0.90      |
| 1.96                     | H=12121121221221111211212221122211211221212221221121   | 9.26E-05 | 2.44E-03                     | 0.90      |
| 2.56                     | H=2111121212111111221122212121222211111111121112222    | 2.03E-08 | 6.87E-06                     | 0.83      |
| 1.82                     | H=1221112121122212221111122112221122122122212121111    | 7.15E-06 | 1.28E-03                     | 1.21      |
| 1.98                     | H=22121212112211222221122212221221121212122221112122   | 2.64E-06 | 5.53E-04                     | 0.24      |
| 3.14                     | H=12221222211121212212221212122222222122222111212121   | 5.70E-10 | 3.05E-07                     | 1.11      |
| 1.81                     | H=12121111111222121121121211211122212112121221121122   | 9.18E-07 | 5.61E-05                     | 1.17      |
| 2.06                     | H=21111121212211112221111212121121221112211212222122   | 9.80E-08 | 2.96E-05                     | 0.97      |
| 2.13                     | H=11122211111212212122112112222222221112221222121111   | 9.78E-10 | 1.99E-07                     | 0.83      |
| 1.80                     | H=22211112122121112212122221221121222212221112221212   | 5.96E-05 | 6.84E-03                     | 0.89      |

|      |                                                       |          |          |      |
|------|-------------------------------------------------------|----------|----------|------|
| 1.57 | H=11111212112112211111222112212222111121112212211222  | 5.20E-05 | 6.18E-03 | 0.95 |
| 1.55 | H=12211222222212222212122212221112112112222121121212  | 4.84E-06 | 2.23E-04 | 1.40 |
| 2.82 | H=22112221121221221221211112222111222121121211112112  | 6.29E-07 | 1.54E-04 | 0.99 |
| 1.86 | H=11112221112221112121121222222112111212112122212222  | 1.43E-08 | 5.32E-06 | 1.16 |
| 1.86 | H=11112221112221112121121222222112111212112122212222  | 1.43E-08 | 1.88E-06 | 1.16 |
| 2.44 | H=1211221111222111112111122212222222222122122212122   | 2.01E-07 | 5.19E-05 | 0.88 |
| 1.71 | H=121221122111222122121211222121212211122212121221212 | 6.41E-05 | 7.12E-03 | 1.19 |
| 2.25 | H=12222122111121211121221212121122212112211122112122  | 1.61E-09 | 2.90E-07 | 1.15 |
| 3.54 | H=21222221211211221221111221111221212112222112221121  | 8.79E-22 | 1.03E-18 | 0.92 |
| 1.66 | H=2121221112111121212121222122112121121111112222112   | 6.95E-07 | 4.66E-05 | 1.07 |

**Supplementary Table S4: Results of the haplotype effect estimation with fertility, reproduction and survival traits for the Swiss Holstein population.**

|             | <b>name</b> | <b>haplotype</b>      | <b>trait</b> | <b>trait description</b>                   | <b>freq</b> | <b>b-value</b> | <b>se</b> | <b>p-value</b> |
|-------------|-------------|-----------------------|--------------|--------------------------------------------|-------------|----------------|-----------|----------------|
| <b>HH18</b> |             | 1-103019622-104375908 | P2b          | survival bull period 2                     | 0.0100      | -0.978         | 3.496     | 0.780          |
|             |             | 1-103019622-104375908 | BWd          | birth weight                               | 0.0088      | -0.866         | 1.409     | 0.539          |
|             |             | 1-103019622-104375908 | BWm          | birth weight                               | 0.0085      | -0.407         | 1.568     | 0.795          |
|             |             | 1-103019622-104375908 | P2h          | survival heifer period 2                   | 0.0102      | -5.874         | 6.006     | 0.328          |
|             |             | 1-103019622-104375908 | SBd          | percentage live births                     | 0.0069      | 1.922          | 2.822     | 0.496          |
|             |             | 1-103019622-104375908 | SBm          | percentage live births                     | 0.0033      | -4.211         | 2.374     | 0.076          |
|             |             | 1-103019622-104375908 | CEd          | percentage normal births                   | 0.0021      | 0.404          | 0.897     | 0.652          |
|             |             | 1-103019622-104375908 | CEm          | percentage normal births                   | 0.0027      | 1.704          | 1.417     | 0.229          |
|             |             | 1-103019622-104375908 | NRc          | non-return rate cow                        | 0.0018      | 0.528          | 1.537     | 0.731          |
|             |             | 1-103019622-104375908 | NRh          | non-return rate heifer                     | 0.0019      | -0.564         | 2.123     | 0.791          |
|             |             | 1-103019622-104375908 | P1           | survival period 1                          | 0.0077      | 3.708          | 4.059     | 0.361          |
|             |             | 1-103019622-104375908 | DFS          | interval calving to insemination           | 0.0015      | 1.774          | 1.498     | 0.236          |
|             |             | 1-103019622-104375908 | GLd          | gestation length                           | 0.0102      | 0.047          | 1.327     | 0.972          |
|             |             | 1-103019622-104375908 | GLm          | gestation length                           | 0.0094      | 1.225          | 1.575     | 0.437          |
|             |             | 1-103019622-104375908 | MBd          | multiple birth                             | 0.0096      | 1.199          | 1.865     | 0.520          |
|             |             | 1-103019622-104375908 | MBm          | multiple birth                             | 0.0080      | 3.233          | 2.354     | 0.170          |
|             |             | 1-103019622-104375908 | IFLc         | interval first to last insemination cow    | 0.0014      | 2.394          | 1.413     | 0.090          |
|             |             | 1-103019622-104375908 | IFLh         | interval first to last insemination heifer | 0.0049      | 0.171          | 2.548     | 0.946          |
| <b>HH19</b> |             | 1-139873827-140642688 | P2b          | survival bull period 2                     | 0.0100      | -1.003         | 3.555     | 0.778          |
|             |             | 1-139873827-140642688 | BWd          | birth weight                               | 0.0093      | 1.407          | 1.345     | 0.296          |
|             |             | 1-139873827-140642688 | BWm          | birth weight                               | 0.0085      | 0.048          | 1.530     | 0.975          |
|             |             | 1-139873827-140642688 | P2h          | survival heifer period 2                   | 0.0102      | -2.722         | 5.959     | 0.648          |
|             |             | 1-139873827-140642688 | SBd          | percentage live births                     | 0.0086      | 2.783          | 2.494     | 0.264          |
|             |             | 1-139873827-140642688 | SBm          | percentage live births                     | 0.0039      | -1.708         | 2.162     | 0.429          |
|             |             | 1-139873827-140642688 | CEd          | percentage normal births                   | 0.0026      | -0.859         | 0.802     | 0.284          |
|             |             | 1-139873827-140642688 | CEm          | percentage normal births                   | 0.0034      | 1.622          | 1.260     | 0.198          |
|             |             | 1-139873827-140642688 | NRc          | non-return rate cow                        | 0.0020      | 0.321          | 1.417     | 0.821          |
|             |             | 1-139873827-140642688 | NRh          | non-return rate heifer                     | 0.0023      | 1.495          | 1.909     | 0.434          |
|             |             | 1-139873827-140642688 | P1           | survival period 1                          | 0.0073      | -5.187         | 4.170     | 0.214          |
|             |             | 1-139873827-140642688 | DFS          | interval calving to insemination           | 0.0019      | 0.671          | 1.331     | 0.614          |
|             |             | 1-139873827-140642688 | GLd          | gestation length                           | 0.0113      | 2.599          | 1.258     | <b>0.039</b>   |
|             |             | 1-139873827-140642688 | GLm          | gestation length                           | 0.0111      | 2.122          | 1.454     | 0.144          |
|             |             | 1-139873827-140642688 | MBd          | multiple birth                             | 0.0076      | -2.237         | 2.128     | 0.293          |
|             |             | 1-139873827-140642688 | MBm          | multiple birth                             | 0.0063      | 0.552          | 2.620     | 0.833          |
|             |             | 1-139873827-140642688 | IFLc         | interval first to last insemination cow    | 0.0018      | 0.408          | 1.256     | 0.745          |

|                    |                       |                    |                                            |                        |        |        |              |
|--------------------|-----------------------|--------------------|--------------------------------------------|------------------------|--------|--------|--------------|
|                    | 1-139873827-140642688 | IFLh               | interval first to last insemination heifer | 0.0048                 | -0.205 | 2.568  | 0.936        |
| HH25               | 10-86876435-87772797  | P2b                | survival bull period 2                     | 0.0154                 | -2.983 | 3.252  | 0.359        |
|                    | 10-86876435-87772797  | BWd                | birth weight                               | 0.0140                 | -0.867 | 1.321  | 0.511        |
|                    | 10-86876435-87772797  | BWm                | birth weight                               | 0.0133                 | -0.226 | 1.494  | 0.880        |
|                    | 10-86876435-87772797  | P2h                | survival heifer period 2                   | 0.0152                 | 0.934  | 5.673  | 0.869        |
|                    | 10-86876435-87772797  | SBd                | percentage live births                     | 0.0157                 | -2.126 | 2.209  | 0.336        |
|                    | 10-86876435-87772797  | SBm                | percentage live births                     | 0.0177                 | -1.326 | 1.399  | 0.344        |
|                    | 10-86876435-87772797  | CEd                | percentage normal births                   | 0.0144                 | 0.046  | 0.482  | 0.925        |
|                    | 10-86876435-87772797  | CEm                | percentage normal births                   | 0.0165                 | 0.319  | 0.791  | 0.687        |
|                    | 10-86876435-87772797  | NRc                | non-return rate cow                        | 0.0169                 | -1.196 | 0.698  | 0.087        |
|                    | 10-86876435-87772797  | NRh                | non-return rate heifer                     | 0.0155                 | 0.120  | 0.953  | 0.900        |
|                    | 10-86876435-87772797  | P1                 | survival period 1                          | 0.0158                 | -2.508 | 3.241  | 0.439        |
|                    | 10-86876435-87772797  | DFS                | interval calving to insemination           | 0.0156                 | 1.637  | 0.668  | <b>0.014</b> |
|                    | 10-86876435-87772797  | GLd                | gestation length                           | 0.0137                 | 0.536  | 1.335  | 0.688        |
|                    | 10-86876435-87772797  | GLm                | gestation length                           | 0.0138                 | 1.887  | 1.533  | 0.218        |
|                    | 10-86876435-87772797  | MBd                | multiple birth                             | 0.0166                 | -1.937 | 1.576  | 0.219        |
|                    | 10-86876435-87772797  | MBm                | multiple birth                             | 0.0102                 | 4.202  | 2.402  | 0.080        |
|                    | 10-86876435-87772797  | IFLc               | interval first to last insemination cow    | 0.0152                 | 0.046  | 0.632  | 0.942        |
|                    | 10-86876435-87772797  | IFLh               | interval first to last insemination heifer | 0.0093                 | -2.074 | 2.137  | 0.332        |
|                    | HH26                  | 11-4531428-5362251 | P2b                                        | survival bull period 2 | 0.0063 | -1.728 | 4.418        |
| 11-4531428-5362251 |                       | BWd                | birth weight                               | 0.0058                 | 0.961  | 1.695  | 0.570        |
| 11-4531428-5362251 |                       | BWm                | birth weight                               | 0.0059                 | -1.635 | 1.844  | 0.375        |
| 11-4531428-5362251 |                       | P2h                | survival heifer period 2                   | 0.0074                 | -3.060 | 7.055  | 0.664        |
| 11-4531428-5362251 |                       | SBd                | percentage live births                     | 0.0059                 | 1.207  | 2.976  | 0.685        |
| 11-4531428-5362251 |                       | SBm                | percentage live births                     | 0.0040                 | -0.153 | 2.142  | 0.943        |
| 11-4531428-5362251 |                       | CEd                | percentage normal births                   | 0.0029                 | -0.449 | 0.753  | 0.551        |
| 11-4531428-5362251 |                       | CEm                | percentage normal births                   | 0.0034                 | 1.601  | 1.255  | 0.202        |
| 11-4531428-5362251 |                       | NRc                | non-return rate cow                        | 0.0030                 | 0.618  | 1.210  | 0.610        |
| 11-4531428-5362251 |                       | NRh                | non-return rate heifer                     | 0.0032                 | -0.598 | 1.675  | 0.721        |
| 11-4531428-5362251 |                       | P1                 | survival period 1                          | 0.0056                 | 0.534  | 4.736  | 0.910        |
| 11-4531428-5362251 |                       | DFS                | interval calving to insemination           | 0.0025                 | 0.662  | 1.177  | 0.574        |
| 11-4531428-5362251 |                       | GLd                | gestation length                           | 0.0067                 | 5.004  | 1.592  | <b>0.002</b> |
| 11-4531428-5362251 |                       | GLm                | gestation length                           | 0.0062                 | 3.484  | 1.913  | 0.069        |
| 11-4531428-5362251 |                       | MBd                | multiple birth                             | 0.0057                 | -0.911 | 2.488  | 0.714        |
| 11-4531428-5362251 |                       | MBm                | multiple birth                             | 0.0067                 | 0.902  | 2.610  | 0.730        |
| 11-4531428-5362251 |                       | IFLc               | interval first to last insemination cow    | 0.0025                 | 0.369  | 1.086  | 0.734        |
| 11-4531428-5362251 |                       | IFLh               | interval first to last insemination heifer | 0.0042                 | 0.058  | 2.803  | 0.983        |
|                    |                       | 13-7083081-8296886 | P2b                                        | survival bull period 2 | 0.0068 | -0.271 | 4.292        |

|                      |                    |                          |                                            |                        |        |        |              |       |
|----------------------|--------------------|--------------------------|--------------------------------------------|------------------------|--------|--------|--------------|-------|
| HH7                  | 13-7083081-8296886 | BWd                      | birth weight                               | 0.0083                 | 1.828  | 1.462  | 0.211        |       |
|                      | 13-7083081-8296886 | BWm                      | birth weight                               | 0.0077                 | -0.165 | 1.639  | 0.920        |       |
|                      | 13-7083081-8296886 | P2h                      | survival heifer period 2                   | 0.0074                 | -7.479 | 7.069  | 0.290        |       |
|                      | 13-7083081-8296886 | SBd                      | percentage live births                     | 0.0074                 | -0.954 | 2.713  | 0.725        |       |
|                      | 13-7083081-8296886 | SBm                      | percentage live births                     | 0.0054                 | -1.806 | 1.860  | 0.332        |       |
|                      | 13-7083081-8296886 | CEd                      | percentage normal births                   | 0.0045                 | -0.884 | 0.621  | 0.155        |       |
|                      | 13-7083081-8296886 | CEm                      | percentage normal births                   | 0.0052                 | -0.224 | 1.037  | 0.829        |       |
|                      | 13-7083081-8296886 | NRc                      | non-return rate cow                        | 0.0047                 | -0.896 | 0.972  | 0.356        |       |
|                      | 13-7083081-8296886 | NRh                      | non-return rate heifer                     | 0.0041                 | -1.238 | 1.476  | 0.402        |       |
|                      | 13-7083081-8296886 | P1                       | survival period 1                          | 0.0064                 | 5.684  | 4.479  | 0.204        |       |
|                      | 13-7083081-8296886 | DFS                      | interval calving to insemination           | 0.0042                 | -0.553 | 0.911  | 0.544        |       |
|                      | 13-7083081-8296886 | GLd                      | gestation length                           | 0.0088                 | 0.241  | 1.425  | 0.866        |       |
|                      | 13-7083081-8296886 | GLm                      | gestation length                           | 0.0080                 | 3.815  | 1.717  | <b>0.026</b> |       |
|                      | 13-7083081-8296886 | MBd                      | multiple birth                             | 0.0059                 | 2.537  | 2.425  | 0.295        |       |
|                      | 13-7083081-8296886 | MBm                      | multiple birth                             | 0.0056                 | 0.042  | 2.816  | 0.988        |       |
|                      | 13-7083081-8296886 | IFLc                     | interval first to last insemination cow    | 0.0042                 | -0.291 | 0.852  | 0.733        |       |
|                      | 13-7083081-8296886 | IFLh                     | interval first to last insemination heifer | 0.0044                 | -2.066 | 2.742  | 0.451        |       |
|                      | HH28               | 14-24591331-24827448     | P2b                                        | survival bull period 2 | 0.0098 | -1.327 | 3.528        | 0.707 |
|                      |                    | 14-24591331-24827448     | BWd                                        | birth weight           | 0.0086 | -0.301 | 1.414        | 0.831 |
| 14-24591331-24827448 |                    | BWm                      | birth weight                               | 0.0085                 | 2.719  | 1.547  | 0.079        |       |
| 14-24591331-24827448 |                    | P2h                      | survival heifer period 2                   | 0.0116                 | 0.737  | 5.555  | 0.894        |       |
| 14-24591331-24827448 |                    | SBd                      | percentage live births                     | 0.0088                 | 5.122  | 2.479  | <b>0.039</b> |       |
| 14-24591331-24827448 |                    | SBm                      | percentage live births                     | 0.0060                 | 3.964  | 1.758  | <b>0.024</b> |       |
| 14-24591331-24827448 |                    | CEd                      | percentage normal births                   | 0.0049                 | -0.007 | 0.601  | 0.990        |       |
| 14-24591331-24827448 |                    | CEm                      | percentage normal births                   | 0.0054                 | 1.088  | 1.017  | 0.285        |       |
| 14-24591331-24827448 |                    | NRc                      | non-return rate cow                        | 0.0052                 | -0.708 | 0.921  | 0.442        |       |
| 14-24591331-24827448 |                    | NRh                      | non-return rate heifer                     | 0.0055                 | -0.080 | 1.274  | 0.950        |       |
| 14-24591331-24827448 |                    | P1                       | survival period 1                          | 0.0098                 | -2.435 | 3.570  | 0.495        |       |
| 14-24591331-24827448 |                    | DFS                      | interval calving to insemination           | 0.0049                 | 0.383  | 0.866  | 0.658        |       |
| 14-24591331-24827448 |                    | GLd                      | gestation length                           | 0.0086                 | 0.413  | 1.414  | 0.770        |       |
| 14-24591331-24827448 |                    | GLm                      | gestation length                           | 0.0086                 | 0.865  | 1.620  | 0.593        |       |
| 14-24591331-24827448 |                    | MBd                      | multiple birth                             | 0.0103                 | -0.373 | 1.827  | 0.838        |       |
| 14-24591331-24827448 |                    | MBm                      | multiple birth                             | 0.0067                 | -2.869 | 2.524  | 0.256        |       |
| 14-24591331-24827448 |                    | IFLc                     | interval first to last insemination cow    | 0.0046                 | -0.205 | 0.821  | 0.803        |       |
| 14-24591331-24827448 |                    | IFLh                     | interval first to last insemination heifer | 0.0070                 | -1.805 | 2.131  | 0.397        |       |
| 14-58128474-59238055 |                    | P2b                      | survival bull period 2                     | 0.0096                 | -0.319 | 3.619  | 0.930        |       |
| 14-58128474-59238055 | BWd                | birth weight             | 0.0087                                     | 0.016                  | 1.407  | 0.991  |              |       |
| 14-58128474-59238055 | BWm                | birth weight             | 0.0071                                     | -1.691                 | 1.693  | 0.318  |              |       |
| 14-58128474-59238055 | P2h                | survival heifer period 2 | 0.0083                                     | 10.125                 | 6.601  | 0.125  |              |       |



|                      |                      |                                            |                                            |                        |        |        |              |              |
|----------------------|----------------------|--------------------------------------------|--------------------------------------------|------------------------|--------|--------|--------------|--------------|
| HH29                 | 14-58128474-59238055 | SBd                                        | percentage live births                     | 0.0076                 | 1.238  | 2.646  | 0.640        |              |
|                      | 14-58128474-59238055 | SBm                                        | percentage live births                     | 0.0031                 | 5.298  | 2.402  | <b>0.027</b> |              |
|                      | 14-58128474-59238055 | CEd                                        | percentage normal births                   | 0.0031                 | 0.728  | 0.734  | 0.321        |              |
|                      | 14-58128474-59238055 | CEm                                        | percentage normal births                   | 0.0031                 | 2.625  | 1.315  | <b>0.046</b> |              |
|                      | 14-58128474-59238055 | NRc                                        | non-return rate cow                        | 0.0020                 | 0.384  | 1.456  | 0.792        |              |
|                      | 14-58128474-59238055 | NRh                                        | non-return rate heifer                     | 0.0025                 | -2.481 | 1.859  | 0.182        |              |
|                      | 14-58128474-59238055 | P1                                         | survival period 1                          | 0.0081                 | 1.991  | 3.958  | 0.615        |              |
|                      | 14-58128474-59238055 | DFS                                        | interval calving to insemination           | 0.0018                 | 2.029  | 1.376  | 0.140        |              |
|                      | 14-58128474-59238055 | GLd                                        | gestation length                           | 0.0087                 | 0.825  | 1.421  | 0.562        |              |
|                      | 14-58128474-59238055 | GLm                                        | gestation length                           | 0.0088                 | 0.435  | 1.612  | 0.787        |              |
|                      | 14-58128474-59238055 | MBd                                        | multiple birth                             | 0.0057                 | -2.184 | 2.438  | 0.370        |              |
|                      | 14-58128474-59238055 | MBm                                        | multiple birth                             | 0.0050                 | -0.578 | 2.918  | 0.843        |              |
|                      | 14-58128474-59238055 | IFLc                                       | interval first to last insemination cow    | 0.0017                 | 0.304  | 1.306  | 0.816        |              |
|                      | 14-58128474-59238055 | IFLh                                       | interval first to last insemination heifer | 0.0037                 | -2.092 | 2.916  | 0.473        |              |
|                      | HH13                 | 18-60931980-62100899                       | P2b                                        | survival bull period 2 | 0.0063 | -3.189 | 4.745        | 0.502        |
|                      |                      | 18-60931980-62100899                       | BWd                                        | birth weight           | 0.0077 | 4.769  | 1.654        | <b>0.004</b> |
| 18-60931980-62100899 |                      | BWm                                        | birth weight                               | 0.0075                 | 2.237  | 1.826  | 0.221        |              |
| 18-60931980-62100899 |                      | P2h                                        | survival heifer period 2                   | 0.0051                 | 5.964  | 9.002  | 0.508        |              |
| 18-60931980-62100899 |                      | SBd                                        | percentage live births                     | 0.0137                 | -4.283 | 2.337  | 0.067        |              |
| 18-60931980-62100899 |                      | SBm                                        | percentage live births                     | 0.0105                 | 0.953  | 1.566  | 0.543        |              |
| 18-60931980-62100899 |                      | CEd                                        | percentage normal births                   | 0.0099                 | -0.673 | 0.502  | 0.180        |              |
| 18-60931980-62100899 |                      | CEm                                        | percentage normal births                   | 0.0103                 | 0.557  | 0.865  | 0.519        |              |
| 18-60931980-62100899 |                      | NRc                                        | non-return rate cow                        | 0.0089                 | 0.086  | 0.812  | 0.916        |              |
| 18-60931980-62100899 |                      | NRh                                        | non-return rate heifer                     | 0.0102                 | 0.190  | 1.073  | 0.859        |              |
| 18-60931980-62100899 |                      | P1                                         | survival period 1                          | 0.0079                 | 8.882  | 4.323  | <b>0.040</b> |              |
| 18-60931980-62100899 |                      | DFS                                        | interval calving to insemination           | 0.0087                 | 0.903  | 0.755  | 0.232        |              |
| 18-60931980-62100899 |                      | GLd                                        | gestation length                           | 0.0083                 | 2.504  | 1.627  | 0.124        |              |
| 18-60931980-62100899 |                      | GLm                                        | gestation length                           | 0.0074                 | -0.989 | 1.925  | 0.608        |              |
| 18-60931980-62100899 |                      | MBd                                        | multiple birth                             | 0.0050                 | 0.741  | 2.715  | 0.785        |              |
| 18-60931980-62100899 |                      | MBm                                        | multiple birth                             | 0.0013                 | -4.618 | 5.819  | 0.427        |              |
| 18-60931980-62100899 | IFLc                 | interval first to last insemination cow    | 0.0085                                     | -0.164                 | 0.712  | 0.818  |              |              |
| 18-60931980-62100899 | IFLh                 | interval first to last insemination heifer | 0.0018                                     | -4.983                 | 4.358  | 0.253  |              |              |
| 18-62070448-63044863 | P2b                  | survival bull period 2                     | 0.0047                                     | 6.285                  | 5.096  | 0.218  |              |              |
| 18-62070448-63044863 | BWd                  | birth weight                               | 0.0078                                     | -0.601                 | 1.506  | 0.690  |              |              |
| 18-62070448-63044863 | BWm                  | birth weight                               | 0.0057                                     | -1.050                 | 1.896  | 0.580  |              |              |
| 18-62070448-63044863 | P2h                  | survival heifer period 2                   | 0.0037                                     | 6.804                  | 9.557  | 0.477  |              |              |
| 18-62070448-63044863 | SBd                  | percentage live births                     | 0.0061                                     | -3.248                 | 3.003  | 0.279  |              |              |
| 18-62070448-63044863 | SBm                  | percentage live births                     | 0.0027                                     | -3.870                 | 2.610  | 0.138  |              |              |
| 18-62070448-63044863 | CEd                  | percentage normal births                   | 0.0023                                     | 1.014                  | 0.858  | 0.237  |              |              |

|                      |                       |                                            |                                            |        |        |       |              |
|----------------------|-----------------------|--------------------------------------------|--------------------------------------------|--------|--------|-------|--------------|
| HH13                 | 18-62070448-63044863  | CEm                                        | percentage normal births                   | 0.0026 | -0.155 | 1.442 | 0.915        |
|                      | 18-62070448-63044863  | NRc                                        | non-return rate cow                        | 0.0015 | -1.857 | 1.636 | 0.256        |
|                      | 18-62070448-63044863  | NRh                                        | non-return rate heifer                     | 0.0016 | -2.398 | 2.337 | 0.305        |
|                      | 18-62070448-63044863  | P1                                         | survival period 1                          | 0.0027 | -0.754 | 6.601 | 0.909        |
|                      | 18-62070448-63044863  | DFS                                        | interval calving to insemination           | 0.0014 | 0.006  | 1.514 | 0.997        |
|                      | 18-62070448-63044863  | GLd                                        | gestation length                           | 0.0077 | 0.083  | 1.518 | 0.956        |
|                      | 18-62070448-63044863  | GLm                                        | gestation length                           | 0.0074 | 1.084  | 1.769 | 0.540        |
|                      | 18-62070448-63044863  | MBd                                        | multiple birth                             | 0.0037 | -0.936 | 2.995 | 0.755        |
|                      | 18-62070448-63044863  | MBm                                        | multiple birth                             | 0.0035 | 1.080  | 3.453 | 0.754        |
|                      | 18-62070448-63044863  | IFLc                                       | interval first to last insemination cow    | 0.0016 | 0.141  | 1.338 | 0.916        |
| 18-62070448-63044863 | IFLh                  | interval first to last insemination heifer | 0.0016                                     | -4.736 | 4.219  | 0.262 |              |
| HH20                 | 2-134476837-135147756 | P2b                                        | survival bull period 2                     | 0.0039 | 3.999  | 5.558 | 0.472        |
|                      | 2-134476837-135147756 | BWd                                        | birth weight                               | 0.0042 | -1.253 | 1.984 | 0.528        |
|                      | 2-134476837-135147756 | BWm                                        | birth weight                               | 0.0035 | -3.120 | 2.361 | 0.186        |
|                      | 2-134476837-135147756 | P2h                                        | survival heifer period 2                   | 0.0037 | 1.285  | 9.639 | 0.894        |
|                      | 2-134476837-135147756 | SBd                                        | percentage live births                     | 0.0029 | 1.859  | 4.160 | 0.655        |
|                      | 2-134476837-135147756 | SBm                                        | percentage live births                     | 0.0012 | 6.560  | 3.697 | 0.076        |
|                      | 2-134476837-135147756 | CEd                                        | percentage normal births                   | 0.0012 | -1.051 | 1.148 | 0.360        |
|                      | 2-134476837-135147756 | CEm                                        | percentage normal births                   | 0.0012 | 3.763  | 2.042 | 0.065        |
|                      | 2-134476837-135147756 | NRc                                        | non-return rate cow                        | 0.0008 | 0.507  | 2.233 | 0.820        |
|                      | 2-134476837-135147756 | NRh                                        | non-return rate heifer                     | 0.0009 | -0.438 | 2.979 | 0.883        |
|                      | 2-134476837-135147756 | P1                                         | survival period 1                          | 0.0037 | -3.545 | 5.767 | 0.539        |
|                      | 2-134476837-135147756 | DFS                                        | interval calving to insemination           | 0.0007 | 2.229  | 2.126 | 0.294        |
|                      | 2-134476837-135147756 | GLd                                        | gestation length                           | 0.0044 | 1.535  | 1.949 | 0.431        |
|                      | 2-134476837-135147756 | GLm                                        | gestation length                           | 0.0041 | 0.475  | 2.306 | 0.837        |
|                      | 2-134476837-135147756 | MBd                                        | multiple birth                             | 0.0031 | -0.663 | 3.315 | 0.841        |
|                      | 2-134476837-135147756 | MBm                                        | multiple birth                             | 0.0024 | 5.183  | 4.180 | 0.215        |
|                      | 2-134476837-135147756 | IFLc                                       | interval first to last insemination cow    | 0.0007 | 0.965  | 1.979 | 0.626        |
|                      | 2-134476837-135147756 | IFLh                                       | interval first to last insemination heifer | 0.0018 | 1.637  | 4.058 | 0.687        |
| 30                   | 21-7844296-8671178    | P2b                                        | survival bull period 2                     | 0.0040 | 4.689  | 5.496 | 0.394        |
|                      | 21-7844296-8671178    | BWd                                        | birth weight                               | 0.0044 | -4.072 | 1.957 | <b>0.037</b> |
|                      | 21-7844296-8671178    | BWm                                        | birth weight                               | 0.0041 | -2.270 | 2.207 | 0.304        |
|                      | 21-7844296-8671178    | P2h                                        | survival heifer period 2                   | 0.0028 | 12.672 | ##### | 0.255        |
|                      | 21-7844296-8671178    | SBd                                        | percentage live births                     | 0.0035 | 6.314  | 3.868 | 0.103        |
|                      | 21-7844296-8671178    | SBm                                        | percentage live births                     | 0.0012 | -4.643 | 3.746 | 0.215        |
|                      | 21-7844296-8671178    | CEd                                        | percentage normal births                   | 0.0012 | 2.811  | 1.168 | <b>0.016</b> |
|                      | 21-7844296-8671178    | CEm                                        | percentage normal births                   | 0.0013 | 4.793  | 2.003 | <b>0.017</b> |
|                      | 21-7844296-8671178    | NRc                                        | non-return rate cow                        | 0.0007 | -1.182 | 2.449 | 0.629        |
|                      | 21-7844296-8671178    | NRh                                        | non-return rate heifer                     | 0.0007 | 3.742  | 3.396 | 0.271        |

|      |                      |      |                                            |        |        |       |              |
|------|----------------------|------|--------------------------------------------|--------|--------|-------|--------------|
| HH3  | 21-7844296-8671178   | P1   | survival period 1                          | 0.0029 | 0.922  | 6.526 | 0.888        |
|      | 21-7844296-8671178   | DFS  | interval calving to insemination           | 0.0005 | 1.193  | 2.517 | 0.635        |
|      | 21-7844296-8671178   | GLd  | gestation length                           | 0.0049 | -0.110 | 1.896 | 0.954        |
|      | 21-7844296-8671178   | GLm  | gestation length                           | 0.0046 | -1.649 | 2.235 | 0.461        |
|      | 21-7844296-8671178   | MBd  | multiple birth                             | 0.0024 | 4.538  | 3.723 | 0.223        |
|      | 21-7844296-8671178   | MBm  | multiple birth                             | 0.0019 | 0.300  | 4.655 | 0.949        |
|      | 21-7844296-8671178   | IFLc | interval first to last insemination cow    | 0.0005 | 1.898  | 2.291 | 0.407        |
|      | 21-7844296-8671178   | IFLh | interval first to last insemination heifer | 0.0009 | 2.002  | 5.669 | 0.724        |
| HH30 | 22-59811442-60703550 | P2b  | survival bull period 2                     | 0.0047 | 2.523  | 5.041 | 0.617        |
|      | 22-59811442-60703550 | BWd  | birth weight                               | 0.0052 | -0.157 | 1.774 | 0.929        |
|      | 22-59811442-60703550 | BWm  | birth weight                               | 0.0055 | -2.056 | 1.891 | 0.277        |
|      | 22-59811442-60703550 | P2h  | survival heifer period 2                   | 0.0037 | -8.642 | 9.650 | 0.370        |
|      | 22-59811442-60703550 | SBd  | percentage live births                     | 0.0045 | 4.786  | 3.400 | 0.159        |
|      | 22-59811442-60703550 | SBm  | percentage live births                     | 0.0021 | 0.733  | 2.902 | 0.800        |
|      | 22-59811442-60703550 | CEd  | percentage normal births                   | 0.0014 | 0.140  | 1.070 | 0.896        |
|      | 22-59811442-60703550 | CEm  | percentage normal births                   | 0.0017 | 2.992  | 1.745 | 0.086        |
|      | 22-59811442-60703550 | NRc  | non-return rate cow                        | 0.0009 | -0.534 | 2.112 | 0.801        |
|      | 22-59811442-60703550 | NRh  | non-return rate heifer                     | 0.0010 | -2.848 | 2.785 | 0.307        |
|      | 22-59811442-60703550 | P1   | survival period 1                          | 0.0042 | 2.880  | 5.434 | 0.596        |
|      | 22-59811442-60703550 | DFS  | interval calving to insemination           | 0.0009 | 2.138  | 1.892 | 0.259        |
|      | 22-59811442-60703550 | GLd  | gestation length                           | 0.0061 | 3.284  | 1.672 | <b>0.050</b> |
|      | 22-59811442-60703550 | GLm  | gestation length                           | 0.0058 | 4.356  | 1.961 | <b>0.026</b> |
|      | 22-59811442-60703550 | MBd  | multiple birth                             | 0.0048 | 4.492  | 2.655 | 0.091        |
|      | 22-59811442-60703550 | MBm  | multiple birth                             | 0.0024 | -5.100 | 4.171 | 0.221        |
|      | 22-59811442-60703550 | IFLc | interval first to last insemination cow    | 0.0008 | 0.430  | 1.805 | 0.811        |
|      | 22-59811442-60703550 | IFLh | interval first to last insemination heifer | 0.0022 | 4.432  | 3.742 | 0.236        |
| HH32 | 23-32773236-33726454 | P2b  | survival bull period 2                     | 0.0000 | -2.464 | 4.744 | 0.603        |
|      | 23-32773236-33726454 | BWd  | birth weight                               | 0.0000 | -3.708 | 1.804 | <b>0.040</b> |
|      | 23-32773236-33726454 | BWm  | birth weight                               | 0.0000 | -1.444 | 2.024 | 0.476        |
|      | 23-32773236-33726454 | P2h  | survival heifer period 2                   | 0.0000 | -3.161 | 9.011 | 0.726        |
|      | 23-32773236-33726454 | SBd  | percentage live births                     | 0.0000 | 4.422  | 3.686 | 0.230        |
|      | 23-32773236-33726454 | SBm  | percentage live births                     | 0.0000 | 2.775  | 3.306 | 0.401        |
|      | 23-32773236-33726454 | CEd  | percentage normal births                   | 0.0000 | 0.857  | 1.204 | 0.476        |
|      | 23-32773236-33726454 | CEm  | percentage normal births                   | 0.0000 | 4.495  | 1.873 | <b>0.016</b> |
|      | 23-32773236-33726454 | NRc  | non-return rate cow                        | 0.0000 | 2.901  | 2.229 | 0.193        |
|      | 23-32773236-33726454 | NRh  | non-return rate heifer                     | 0.0000 | 0.905  | 3.028 | 0.765        |
|      | 23-32773236-33726454 | P1   | survival period 1                          | 0.0000 | 4.209  | 5.259 | 0.423        |
|      | 23-32773236-33726454 | DFS  | interval calving to insemination           | 0.0000 | 1.944  | 2.186 | 0.374        |

|      |                      |      |                                            |        |        |       |              |
|------|----------------------|------|--------------------------------------------|--------|--------|-------|--------------|
|      | 23-32773236-33726454 | GLd  | gestation length                           | 0.0000 | 0.851  | 1.699 | 0.617        |
|      | 23-32773236-33726454 | GLm  | gestation length                           | 0.0000 | 0.544  | 2.019 | 0.787        |
|      | 23-32773236-33726454 | MBd  | multiple birth                             | 0.0000 | 1.850  | 2.725 | 0.497        |
|      | 23-32773236-33726454 | MBm  | multiple birth                             | 0.0000 | -4.466 | 4.132 | 0.280        |
|      | 23-32773236-33726454 | IFLc | interval first to last insemination cow    | 0.0000 | 3.321  | 1.954 | 0.089        |
|      | 23-32773236-33726454 | IFLh | interval first to last insemination heifer | 0.0000 | 0.023  | 3.293 | 0.995        |
| HH32 | 23-33544569-34948131 | P2b  | survival bull period 2                     | 0.0000 | -1.652 | 4.704 | 0.725        |
|      | 23-33544569-34948131 | BWd  | birth weight                               | 0.0000 | -2.656 | 1.767 | 0.133        |
|      | 23-33544569-34948131 | BWm  | birth weight                               | 0.0000 | -0.388 | 1.971 | 0.844        |
|      | 23-33544569-34948131 | P2h  | survival heifer period 2                   | 0.0000 | 5.614  | 8.713 | 0.519        |
|      | 23-33544569-34948131 | SBd  | percentage live births                     | 0.0000 | 2.499  | 3.595 | 0.487        |
|      | 23-33544569-34948131 | SBm  | percentage live births                     | 0.0000 | 4.826  | 3.182 | 0.129        |
|      | 23-33544569-34948131 | CEd  | percentage normal births                   | 0.0000 | 0.995  | 1.188 | 0.402        |
|      | 23-33544569-34948131 | CEm  | percentage normal births                   | 0.0000 | 4.835  | 1.807 | <b>0.007</b> |
|      | 23-33544569-34948131 | NRc  | non-return rate cow                        | 0.0000 | 3.087  | 2.124 | 0.146        |
|      | 23-33544569-34948131 | NRh  | non-return rate heifer                     | 0.0000 | 0.817  | 2.908 | 0.779        |
|      | 23-33544569-34948131 | P1   | survival period 1                          | 0.0000 | 7.390  | 5.205 | 0.156        |
|      | 23-33544569-34948131 | DFS  | interval calving to insemination           | 0.0000 | 3.064  | 2.120 | 0.148        |
|      | 23-33544569-34948131 | GLd  | gestation length                           | 0.0000 | 3.460  | 1.639 | <b>0.035</b> |
|      | 23-33544569-34948131 | GLm  | gestation length                           | 0.0000 | 3.326  | 1.995 | 0.095        |
|      | 23-33544569-34948131 | MBd  | multiple birth                             | 0.0000 | 3.735  | 2.619 | 0.154        |
|      | 23-33544569-34948131 | MBm  | multiple birth                             | 0.0000 | 4.091  | 4.006 | 0.307        |
|      | 23-33544569-34948131 | IFLc | interval first to last insemination cow    | 0.0000 | 3.750  | 1.900 | <b>0.048</b> |
|      | 23-33544569-34948131 | IFLh | interval first to last insemination heifer | 0.0000 | -0.524 | 3.341 | 0.875        |
| HH33 | 24-44692769-45677988 | P2b  | survival bull period 2                     | 0.0112 | -0.031 | 3.345 | 0.993        |
|      | 24-44692769-45677988 | BWd  | birth weight                               | 0.0113 | 0.918  | 1.246 | 0.461        |
|      | 24-44692769-45677988 | BWm  | birth weight                               | 0.0098 | 1.953  | 1.446 | 0.177        |
|      | 24-44692769-45677988 | P2h  | survival heifer period 2                   | 0.0143 | 4.129  | 5.087 | 0.417        |
|      | 24-44692769-45677988 | SBd  | percentage live births                     | 0.0077 | 6.026  | 2.624 | <b>0.022</b> |
|      | 24-44692769-45677988 | SBm  | percentage live births                     | 0.0048 | 0.733  | 2.011 | 0.716        |
|      | 24-44692769-45677988 | CEd  | percentage normal births                   | 0.0034 | -0.337 | 0.718 | 0.639        |
|      | 24-44692769-45677988 | CEm  | percentage normal births                   | 0.0040 | 1.528  | 1.189 | 0.198        |
|      | 24-44692769-45677988 | NRc  | non-return rate cow                        | 0.0034 | -0.650 | 1.156 | 0.574        |
|      | 24-44692769-45677988 | NRh  | non-return rate heifer                     | 0.0039 | -1.053 | 1.560 | 0.500        |
|      | 24-44692769-45677988 | P1   | survival period 1                          | 0.0104 | -0.394 | 3.510 | 0.911        |
|      | 24-44692769-45677988 | DFS  | interval calving to insemination           | 0.0029 | 1.954  | 1.126 | 0.083        |
|      | 24-44692769-45677988 | GLd  | gestation length                           | 0.0115 | 1.981  | 1.245 | 0.112        |
|      | 24-44692769-45677988 | GLm  | gestation length                           | 0.0112 | 1.630  | 1.449 | 0.261        |
|      | 24-44692769-45677988 | MBd  | multiple birth                             | 0.0120 | 0.366  | 1.700 | 0.829        |

|      |                      |                      |                                            |                                            |        |        |              |       |
|------|----------------------|----------------------|--------------------------------------------|--------------------------------------------|--------|--------|--------------|-------|
|      | 24-44692769-45677988 | MBm                  | multiple birth                             | 0.0104                                     | -0.312 | 2.040  | 0.879        |       |
|      | 24-44692769-45677988 | IFLc                 | interval first to last insemination cow    | 0.0028                                     | 0.347  | 1.049  | 0.741        |       |
|      | 24-44692769-45677988 | IFLh                 | interval first to last insemination heifer | 0.0070                                     | -0.802 | 2.149  | 0.709        |       |
| HH34 | 25-36165207-37329782 | P2b                  | survival bull period 2                     | 0.0110                                     | -2.621 | 3.461  | 0.449        |       |
|      | 25-36165207-37329782 | BWd                  | birth weight                               | 0.0124                                     | -0.383 | 1.289  | 0.766        |       |
|      | 25-36165207-37329782 | BWm                  | birth weight                               | 0.0115                                     | -0.283 | 1.424  | 0.843        |       |
|      | 25-36165207-37329782 | P2h                  | survival heifer period 2                   | 0.0125                                     | -5.333 | 5.597  | 0.341        |       |
|      | 25-36165207-37329782 | SBd                  | percentage live births                     | 0.0132                                     | 0.844  | 2.173  | 0.698        |       |
|      | 25-36165207-37329782 | SBm                  | percentage live births                     | 0.0103                                     | 0.717  | 1.397  | 0.608        |       |
|      | 25-36165207-37329782 | CEd                  | percentage normal births                   | 0.0097                                     | 0.351  | 0.440  | 0.424        |       |
|      | 25-36165207-37329782 | CEm                  | percentage normal births                   | 0.0107                                     | 0.669  | 0.753  | 0.374        |       |
|      | 25-36165207-37329782 | NRc                  | non-return rate cow                        | 0.0095                                     | -0.586 | 0.693  | 0.398        |       |
|      | 25-36165207-37329782 | NRh                  | non-return rate heifer                     | 0.0103                                     | -0.352 | 0.953  | 0.712        |       |
|      | 25-36165207-37329782 | P1                   | survival period 1                          | 0.0114                                     | -1.496 | 3.435  | 0.663        |       |
|      | 25-36165207-37329782 | DFS                  | interval calving to insemination           | 0.0095                                     | -0.419 | 0.626  | 0.504        |       |
|      | 25-36165207-37329782 | GLd                  | gestation length                           | 0.0131                                     | -1.335 | 1.277  | 0.296        |       |
|      | 25-36165207-37329782 | GLm                  | gestation length                           | 0.0127                                     | -2.915 | 1.473  | <b>0.048</b> |       |
|      | 25-36165207-37329782 | MBd                  | multiple birth                             | 0.0109                                     | 0.755  | 1.811  | 0.677        |       |
|      | 25-36165207-37329782 | MBm                  | multiple birth                             | 0.0110                                     | -0.020 | 2.081  | 0.992        |       |
|      |                      | 25-36165207-37329782 | IFLc                                       | interval first to last insemination cow    | 0.0096 | -1.062 | 0.578        | 0.066 |
|      |                      | 25-36165207-37329782 | IFLh                                       | interval first to last insemination heifer | 0.0112 | -2.768 | 1.781        | 0.120 |
| HH35 | 26-3358717-4234871   | P2b                  | survival bull period 2                     | 0.0149                                     | 2.643  | 3.300  | 0.423        |       |
|      | 26-3358717-4234871   | BWd                  | birth weight                               | 0.0135                                     | 2.201  | 1.369  | 0.108        |       |
|      | 26-3358717-4234871   | BWm                  | birth weight                               | 0.0127                                     | 1.430  | 1.519  | 0.347        |       |
|      | 26-3358717-4234871   | P2h                  | survival heifer period 2                   | 0.0092                                     | -9.612 | 6.949  | 0.167        |       |
|      | 26-3358717-4234871   | SBd                  | percentage live births                     | 0.0177                                     | -1.453 | 2.184  | 0.506        |       |
|      | 26-3358717-4234871   | SBm                  | percentage live births                     | 0.0158                                     | -3.363 | 1.423  | <b>0.018</b> |       |
|      | 26-3358717-4234871   | CEd                  | percentage normal births                   | 0.0147                                     | 0.529  | 0.460  | 0.250        |       |
|      | 26-3358717-4234871   | CEm                  | percentage normal births                   | 0.0156                                     | -0.046 | 0.774  | 0.953        |       |
|      | 26-3358717-4234871   | NRc                  | non-return rate cow                        | 0.0142                                     | 0.147  | 0.712  | 0.836        |       |
|      | 26-3358717-4234871   | NRh                  | non-return rate heifer                     | 0.0141                                     | -0.251 | 0.956  | 0.793        |       |
|      | 26-3358717-4234871   | P1                   | survival period 1                          | 0.0116                                     | 3.088  | 3.660  | 0.399        |       |
|      | 26-3358717-4234871   | DFS                  | interval calving to insemination           | 0.0138                                     | -0.721 | 0.670  | 0.282        |       |
|      | 26-3358717-4234871   | GLd                  | gestation length                           | 0.0151                                     | 2.537  | 1.342  | 0.059        |       |
|      | 26-3358717-4234871   | GLm                  | gestation length                           | 0.0144                                     | 0.334  | 1.540  | 0.828        |       |
|      | 26-3358717-4234871   | MBd                  | multiple birth                             | 0.0105                                     | -0.985 | 1.929  | 0.610        |       |
|      | 26-3358717-4234871   | MBm                  | multiple birth                             | 0.0028                                     | 0.606  | 4.119  | 0.883        |       |
|      |                      | 26-3358717-4234871   | IFLc                                       | interval first to last insemination cow    | 0.0136 | -0.264 | 0.630        | 0.675 |

|                      |                      |                      |                                            |                        |        |        |              |       |
|----------------------|----------------------|----------------------|--------------------------------------------|------------------------|--------|--------|--------------|-------|
|                      | 26-3358717-4234871   | IFLh                 | interval first to last insemination heifer | 0.0046                 | -0.257 | 2.893  | 0.929        |       |
| HH36                 | 28-28541274-29736156 | P2b                  | survival bull period 2                     | 0.0060                 | 8.188  | 4.631  | 0.077        |       |
|                      | 28-28541274-29736156 | BWd                  | birth weight                               | 0.0054                 | 2.074  | 1.802  | 0.250        |       |
|                      | 28-28541274-29736156 | BWm                  | birth weight                               | 0.0045                 | -1.877 | 2.133  | 0.379        |       |
|                      | 28-28541274-29736156 | P2h                  | survival heifer period 2                   | 0.0051                 | 1.671  | 8.383  | 0.842        |       |
|                      | 28-28541274-29736156 | SBd                  | percentage live births                     | 0.0041                 | 0.378  | 3.563  | 0.916        |       |
|                      | 28-28541274-29736156 | SBm                  | percentage live births                     | 0.0016                 | 1.069  | 3.274  | 0.744        |       |
|                      | 28-28541274-29736156 | CEd                  | percentage normal births                   | 0.0014                 | 0.453  | 1.074  | 0.673        |       |
|                      | 28-28541274-29736156 | CEm                  | percentage normal births                   | 0.0014                 | 4.873  | 1.919  | <b>0.011</b> |       |
|                      | 28-28541274-29736156 | NRc                  | non-return rate cow                        | 0.0010                 | 1.589  | 2.029  | 0.434        |       |
|                      | 28-28541274-29736156 | NRh                  | non-return rate heifer                     | 0.0013                 | 3.651  | 2.538  | 0.150        |       |
|                      | 28-28541274-29736156 | P1                   | survival period 1                          | 0.0050                 | 5.673  | 5.092  | 0.265        |       |
|                      | 28-28541274-29736156 | DFS                  | interval calving to insemination           | 0.0007                 | -0.299 | 2.110  | 0.887        |       |
|                      | 28-28541274-29736156 | GLd                  | gestation length                           | 0.0054                 | -0.013 | 1.809  | 0.994        |       |
|                      | 28-28541274-29736156 | GLm                  | gestation length                           | 0.0055                 | -0.363 | 2.055  | 0.860        |       |
|                      | 28-28541274-29736156 | MBd                  | multiple birth                             | 0.0057                 | -3.041 | 2.494  | 0.223        |       |
|                      | 28-28541274-29736156 | MBm                  | multiple birth                             | 0.0041                 | 0.558  | 3.444  | 0.871        |       |
|                      | 28-28541274-29736156 | IFLc                 | interval first to last insemination cow    | 0.0007                 | 2.249  | 1.992  | 0.259        |       |
|                      | 28-28541274-29736156 | IFLh                 | interval first to last insemination heifer | 0.0027                 | -1.378 | 3.422  | 0.687        |       |
|                      | HH36                 | 28-29731696-30877496 | P2b                                        | survival bull period 2 | 0.0093 | -1.324 | 3.834        | 0.730 |
|                      |                      | 28-29731696-30877496 | BWd                                        | birth weight           | 0.0089 | 0.240  | 1.464        | 0.870 |
| 28-29731696-30877496 |                      | BWm                  | birth weight                               | 0.0090                 | 2.799  | 1.594  | 0.079        |       |
| 28-29731696-30877496 |                      | P2h                  | survival heifer period 2                   | 0.0074                 | -6.137 | 7.129  | 0.389        |       |
| 28-29731696-30877496 |                      | SBd                  | percentage live births                     | 0.0078                 | 0.941  | 2.763  | 0.734        |       |
| 28-29731696-30877496 |                      | SBm                  | percentage live births                     | 0.0054                 | 1.944  | 1.864  | 0.297        |       |
| 28-29731696-30877496 |                      | CEd                  | percentage normal births                   | 0.0044                 | -0.348 | 0.629  | 0.580        |       |
| 28-29731696-30877496 |                      | CEm                  | percentage normal births                   | 0.0048                 | 1.947  | 1.078  | 0.071        |       |
| 28-29731696-30877496 |                      | NRc                  | non-return rate cow                        | 0.0046                 | -0.417 | 0.971  | 0.667        |       |
| 28-29731696-30877496 |                      | NRh                  | non-return rate heifer                     | 0.0045                 | 1.544  | 1.398  | 0.269        |       |
| 28-29731696-30877496 |                      | P1                   | survival period 1                          | 0.0081                 | -3.359 | 4.104  | 0.413        |       |
| 28-29731696-30877496 |                      | DFS                  | interval calving to insemination           | 0.0041                 | -0.418 | 0.921  | 0.650        |       |
| 28-29731696-30877496 |                      | GLd                  | gestation length                           | 0.0096                 | 0.979  | 1.433  | 0.495        |       |
| 28-29731696-30877496 |                      | GLm                  | gestation length                           | 0.0088                 | 2.218  | 1.709  | 0.194        |       |
| 28-29731696-30877496 |                      | MBd                  | multiple birth                             | 0.0116                 | 0.735  | 1.823  | 0.687        |       |
| 28-29731696-30877496 |                      | MBm                  | multiple birth                             | 0.0074                 | 4.502  | 2.586  | 0.082        |       |
| 28-29731696-30877496 |                      | IFLc                 | interval first to last insemination cow    | 0.0038                 | -0.326 | 0.877  | 0.710        |       |
| 28-29731696-30877496 |                      | IFLh                 | interval first to last insemination heifer | 0.0044                 | 0.171  | 2.789  | 0.951        |       |
|                      |                      | 28-40347735-41271169 | P2b                                        | survival bull period 2 | 0.0098 | 5.278  | 3.552        | 0.137 |

|                      |                      |                          |                                            |                        |         |        |              |       |
|----------------------|----------------------|--------------------------|--------------------------------------------|------------------------|---------|--------|--------------|-------|
| HH37                 | 28-40347735-41271169 | BWd                      | birth weight                               | 0.0097                 | -0.538  | 1.343  | 0.689        |       |
|                      | 28-40347735-41271169 | BWm                      | birth weight                               | 0.0084                 | -0.583  | 1.563  | 0.709        |       |
|                      | 28-40347735-41271169 | P2h                      | survival heifer period 2                   | 0.0051                 | 3.884   | 8.472  | 0.647        |       |
|                      | 28-40347735-41271169 | SBd                      | percentage live births                     | 0.0076                 | 7.988   | 2.652  | <b>0.003</b> |       |
|                      | 28-40347735-41271169 | SBm                      | percentage live births                     | 0.0026                 | 2.618   | 2.662  | 0.325        |       |
|                      | 28-40347735-41271169 | CEd                      | percentage normal births                   | 0.0018                 | -0.166  | 0.961  | 0.863        |       |
|                      | 28-40347735-41271169 | CEm                      | percentage normal births                   | 0.0024                 | 4.490   | 1.503  | <b>0.003</b> |       |
|                      | 28-40347735-41271169 | NRc                      | non-return rate cow                        | 0.0005                 | -1.039  | 2.760  | 0.706        |       |
|                      | 28-40347735-41271169 | NRh                      | non-return rate heifer                     | 0.0008                 | -1.581  | 3.126  | 0.613        |       |
|                      | 28-40347735-41271169 | P1                       | survival period 1                          | 0.0048                 | -7.852  | 5.078  | 0.122        |       |
|                      | 28-40347735-41271169 | DFS                      | interval calving to insemination           | 0.0005                 | 4.561   | 2.569  | 0.076        |       |
|                      | 28-40347735-41271169 | GLd                      | gestation length                           | 0.0120                 | 3.437   | 1.225  | <b>0.005</b> |       |
|                      | 28-40347735-41271169 | GLm                      | gestation length                           | 0.0107                 | 4.268   | 1.482  | <b>0.004</b> |       |
|                      | 28-40347735-41271169 | MBd                      | multiple birth                             | 0.0052                 | 2.007   | 2.543  | 0.430        |       |
|                      | 28-40347735-41271169 | MBm                      | multiple birth                             | 0.0050                 | 6.868   | 2.977  | <b>0.021</b> |       |
|                      | 28-40347735-41271169 | IFLc                     | interval first to last insemination cow    | 0.0005                 | 1.977   | 2.369  | 0.404        |       |
|                      | 28-40347735-41271169 | IFLh                     | interval first to last insemination heifer | 0.0020                 | -12.309 | 3.942  | <b>0.002</b> |       |
|                      | HH38                 | 29-14242732-15316961     | P2b                                        | survival bull period 2 | 0.0065  | -0.873 | 4.379        | 0.842 |
|                      |                      | 29-14242732-15316961     | BWd                                        | birth weight           | 0.0051  | 0.113  | 1.825        | 0.951 |
|                      |                      | 29-14242732-15316961     | BWm                                        | birth weight           | 0.0052  | 0.791  | 1.984        | 0.690 |
| 29-14242732-15316961 |                      | P2h                      | survival heifer period 2                   | 0.0046                 | -13.860 | 8.731  | 0.112        |       |
| 29-14242732-15316961 |                      | SBd                      | percentage live births                     | 0.0042                 | -1.896  | 3.566  | 0.595        |       |
| 29-14242732-15316961 |                      | SBm                      | percentage live births                     | 0.0017                 | -0.151  | 3.320  | 0.964        |       |
| 29-14242732-15316961 |                      | CEd                      | percentage normal births                   | 0.0012                 | -0.089  | 1.181  | 0.940        |       |
| 29-14242732-15316961 |                      | CEm                      | percentage normal births                   | 0.0014                 | 3.911   | 1.966  | <b>0.047</b> |       |
| 29-14242732-15316961 |                      | NRc                      | non-return rate cow                        | 0.0007                 | 0.063   | 2.386  | 0.979        |       |
| 29-14242732-15316961 |                      | NRh                      | non-return rate heifer                     | 0.0009                 | 0.744   | 2.988  | 0.803        |       |
| 29-14242732-15316961 |                      | P1                       | survival period 1                          | 0.0052                 | -4.491  | 4.904  | 0.360        |       |
| 29-14242732-15316961 |                      | DFS                      | interval calving to insemination           | 0.0006                 | 2.400   | 2.402  | 0.318        |       |
| 29-14242732-15316961 |                      | GLd                      | gestation length                           | 0.0061                 | 0.947   | 1.719  | 0.582        |       |
| 29-14242732-15316961 |                      | GLm                      | gestation length                           | 0.0059                 | -0.337  | 1.989  | 0.865        |       |
| 29-14242732-15316961 |                      | MBd                      | multiple birth                             | 0.0055                 | -1.001  | 2.499  | 0.689        |       |
| 29-14242732-15316961 |                      | MBm                      | multiple birth                             | 0.0030                 | -1.427  | 3.720  | 0.701        |       |
| 29-14242732-15316961 |                      | IFLc                     | interval first to last insemination cow    | 0.0006                 | 1.845   | 2.246  | 0.412        |       |
| 29-14242732-15316961 |                      | IFLh                     | interval first to last insemination heifer | 0.0024                 | -4.446  | 3.575  | 0.214        |       |
| 7-7867806-10428419   |                      | P2b                      | survival bull period 2                     | 0.1543                 | -2.555  | 1.190  | <b>0.032</b> |       |
| 7-7867806-10428419   |                      | BWd                      | birth weight                               | 0.1502                 | 0.594   | 0.474  | 0.210        |       |
| 7-7867806-10428419   | BWm                  | birth weight             | 0.1508                                     | 0.818                  | 0.519   | 0.115  |              |       |
| 7-7867806-10428419   | P2h                  | survival heifer period 2 | 0.1530                                     | -1.704                 | 2.041   | 0.404  |              |       |

|                    |                     |                    |                                            |                        |        |        |       |
|--------------------|---------------------|--------------------|--------------------------------------------|------------------------|--------|--------|-------|
| HH21               | 7-7867806-10428419  | SBd                | percentage live births                     | 0.1393                 | -1.241 | 0.862  | 0.150 |
|                    | 7-7867806-10428419  | SBm                | percentage live births                     | 0.1473                 | 0.494  | 0.523  | 0.345 |
|                    | 7-7867806-10428419  | CEd                | percentage normal births                   | 0.1445                 | 0.028  | 0.164  | 0.866 |
|                    | 7-7867806-10428419  | CEm                | percentage normal births                   | 0.1493                 | 0.323  | 0.286  | 0.258 |
|                    | 7-7867806-10428419  | NRc                | non-return rate cow                        | 0.1522                 | -0.438 | 0.254  | 0.084 |
|                    | 7-7867806-10428419  | NRh                | non-return rate heifer                     | 0.1456                 | -0.611 | 0.358  | 0.088 |
|                    | 7-7867806-10428419  | P1                 | survival period 1                          | 0.1537                 | -1.277 | 1.205  | 0.289 |
|                    | 7-7867806-10428419  | DFS                | interval calving to insemination           | 0.1520                 | -0.359 | 0.230  | 0.119 |
|                    | 7-7867806-10428419  | GLd                | gestation length                           | 0.1495                 | 0.867  | 0.479  | 0.070 |
|                    | 7-7867806-10428419  | GLm                | gestation length                           | 0.1491                 | 0.993  | 0.546  | 0.069 |
|                    | 7-7867806-10428419  | MBd                | multiple birth                             | 0.1635                 | 0.441  | 0.594  | 0.458 |
|                    | 7-7867806-10428419  | MBm                | multiple birth                             | 0.1599                 | 0.320  | 0.720  | 0.657 |
|                    | 7-7867806-10428419  | IFLc               | interval first to last insemination cow    | 0.1523                 | -0.383 | 0.214  | 0.073 |
|                    | 7-7867806-10428419  | IFLh               | interval first to last insemination heifer | 0.1543                 | -0.581 | 0.631  | 0.357 |
|                    | HH21                | 7-7871925-10432630 | P2b                                        | survival bull period 2 | 0.0388 | -1.866 | 1.886 |
| 7-7871925-10432630 |                     | BWd                | birth weight                               | 0.0410                 | -0.314 | 0.693  | 0.651 |
| 7-7871925-10432630 |                     | BWm                | birth weight                               | 0.0409                 | 0.093  | 0.755  | 0.902 |
| 7-7871925-10432630 |                     | P2h                | survival heifer period 2                   | 0.0467                 | 1.506  | 2.984  | 0.614 |
| 7-7871925-10432630 |                     | SBd                | percentage live births                     | 0.0478                 | 0.108  | 1.144  | 0.925 |
| 7-7871925-10432630 |                     | SBm                | percentage live births                     | 0.0571                 | 0.484  | 0.647  | 0.454 |
| 7-7871925-10432630 |                     | CEd                | percentage normal births                   | 0.0563                 | -0.178 | 0.201  | 0.375 |
| 7-7871925-10432630 |                     | CEm                | percentage normal births                   | 0.0578                 | -0.119 | 0.351  | 0.736 |
| 7-7871925-10432630 |                     | NRc                | non-return rate cow                        | 0.0582                 | -0.298 | 0.313  | 0.341 |
| 7-7871925-10432630 |                     | NRh                | non-return rate heifer                     | 0.0559                 | -0.287 | 0.449  | 0.523 |
| 7-7871925-10432630 |                     | P1                 | survival period 1                          | 0.0409                 | 0.072  | 1.866  | 0.969 |
| 7-7871925-10432630 |                     | DFS                | interval calving to insemination           | 0.0586                 | -0.034 | 0.283  | 0.903 |
| 7-7871925-10432630 |                     | GLd                | gestation length                           | 0.0399                 | 0.578  | 0.710  | 0.416 |
| 7-7871925-10432630 |                     | GLm                | gestation length                           | 0.0405                 | 0.289  | 0.809  | 0.721 |
| 7-7871925-10432630 |                     | MBd                | multiple birth                             | 0.0356                 | 0.594  | 1.026  | 0.562 |
| 7-7871925-10432630 |                     | MBm                | multiple birth                             | 0.0314                 | 1.507  | 1.243  | 0.225 |
| 7-7871925-10432630 |                     | IFLc               | interval first to last insemination cow    | 0.0578                 | -0.025 | 0.263  | 0.923 |
| 7-7871925-10432630 |                     | IFLh               | interval first to last insemination heifer | 0.0364                 | 0.332  | 0.995  | 0.738 |
| HH21               | 7-93581943-94642456 | P2b                | survival bull period 2                     | 0.0096                 | 4.373  | 3.722  | 0.240 |
|                    | 7-93581943-94642456 | BWd                | birth weight                               | 0.0092                 | 0.303  | 1.431  | 0.833 |
|                    | 7-93581943-94642456 | BWm                | birth weight                               | 0.0082                 | -1.220 | 1.654  | 0.461 |
|                    | 7-93581943-94642456 | P2h                | survival heifer period 2                   | 0.0074                 | 2.097  | 7.396  | 0.777 |
|                    | 7-93581943-94642456 | SBd                | percentage live births                     | 0.0064                 | 2.189  | 3.060  | 0.474 |
|                    | 7-93581943-94642456 | SBm                | percentage live births                     | 0.0025                 | 1.121  | 2.888  | 0.698 |
|                    | 7-93581943-94642456 | CEd                | percentage normal births                   | 0.0016                 | -0.041 | 1.061  | 0.969 |



|                     |                     |                                            |                                            |        |        |       |              |
|---------------------|---------------------|--------------------------------------------|--------------------------------------------|--------|--------|-------|--------------|
| HH22                | 7-93581943-94642456 | CEm                                        | percentage normal births                   | 0.0021 | -0.171 | 1.690 | 0.919        |
|                     | 7-93581943-94642456 | NRc                                        | non-return rate cow                        | 0.0008 | 3.191  | 2.308 | 0.167        |
|                     | 7-93581943-94642456 | NRh                                        | non-return rate heifer                     | 0.0009 | 2.958  | 3.156 | 0.349        |
|                     | 7-93581943-94642456 | P1                                         | survival period 1                          | 0.0071 | -2.619 | 4.462 | 0.557        |
|                     | 7-93581943-94642456 | DFS                                        | interval calving to insemination           | 0.0008 | -0.753 | 2.209 | 0.733        |
|                     | 7-93581943-94642456 | GLd                                        | gestation length                           | 0.0099 | 2.164  | 1.387 | 0.119        |
|                     | 7-93581943-94642456 | GLm                                        | gestation length                           | 0.0099 | 2.146  | 1.583 | 0.175        |
|                     | 7-93581943-94642456 | MBd                                        | multiple birth                             | 0.0098 | -0.929 | 1.953 | 0.634        |
|                     | 7-93581943-94642456 | MBm                                        | multiple birth                             | 0.0080 | 0.627  | 2.549 | 0.806        |
|                     | 7-93581943-94642456 | IFLc                                       | interval first to last insemination cow    | 0.0008 | 3.196  | 1.994 | 0.109        |
| 7-93581943-94642456 | IFLh                | interval first to last insemination heifer | 0.0038                                     | -5.181 | 3.060  | 0.090 |              |
| HH23                | 8-15561949-16862751 | P2b                                        | survival bull period 2                     | 0.0072 | 1.454  | 4.161 | 0.727        |
|                     | 8-15561949-16862751 | BWd                                        | birth weight                               | 0.0079 | 0.473  | 1.481 | 0.749        |
|                     | 8-15561949-16862751 | BWm                                        | birth weight                               | 0.0066 | -2.337 | 1.747 | 0.181        |
|                     | 8-15561949-16862751 | P2h                                        | survival heifer period 2                   | 0.0060 | -0.921 | 7.663 | 0.904        |
|                     | 8-15561949-16862751 | SBd                                        | percentage live births                     | 0.0067 | 2.719  | 2.866 | 0.343        |
|                     | 8-15561949-16862751 | SBm                                        | percentage live births                     | 0.0039 | -2.059 | 2.235 | 0.357        |
|                     | 8-15561949-16862751 | CEd                                        | percentage normal births                   | 0.0029 | -0.806 | 0.772 | 0.296        |
|                     | 8-15561949-16862751 | CEm                                        | percentage normal births                   | 0.0035 | 1.644  | 1.273 | 0.196        |
|                     | 8-15561949-16862751 | NRc                                        | non-return rate cow                        | 0.0026 | 0.506  | 1.305 | 0.698        |
|                     | 8-15561949-16862751 | NRh                                        | non-return rate heifer                     | 0.0026 | -1.550 | 1.857 | 0.404        |
|                     | 8-15561949-16862751 | P1                                         | survival period 1                          | 0.0050 | 3.488  | 4.997 | 0.485        |
|                     | 8-15561949-16862751 | DFS                                        | interval calving to insemination           | 0.0022 | 1.173  | 1.260 | 0.352        |
|                     | 8-15561949-16862751 | GLd                                        | gestation length                           | 0.0090 | 2.440  | 1.413 | 0.084        |
|                     | 8-15561949-16862751 | GLm                                        | gestation length                           | 0.0084 | 2.147  | 1.675 | 0.200        |
|                     | 8-15561949-16862751 | MBd                                        | multiple birth                             | 0.0050 | 0.437  | 2.607 | 0.867        |
|                     | 8-15561949-16862751 | MBm                                        | multiple birth                             | 0.0058 | 7.089  | 2.746 | <b>0.010</b> |
|                     | 8-15561949-16862751 | IFLc                                       | interval first to last insemination cow    | 0.0021 | -0.091 | 1.183 | 0.939        |
|                     | 8-15561949-16862751 | IFLh                                       | interval first to last insemination heifer | 0.0037 | -2.680 | 2.944 | 0.362        |
| 24                  | 8-66699044-68005926 | P2b                                        | survival bull period 2                     | 0.0128 | -1.832 | 3.207 | 0.568        |
|                     | 8-66699044-68005926 | BWd                                        | birth weight                               | 0.0129 | 1.025  | 1.189 | 0.389        |
|                     | 8-66699044-68005926 | BWm                                        | birth weight                               | 0.0122 | -2.775 | 1.325 | <b>0.036</b> |
|                     | 8-66699044-68005926 | P2h                                        | survival heifer period 2                   | 0.0106 | 4.589  | 5.874 | 0.435        |
|                     | 8-66699044-68005926 | SBd                                        | percentage live births                     | 0.0125 | -0.004 | 2.088 | 0.998        |
|                     | 8-66699044-68005926 | SBm                                        | percentage live births                     | 0.0096 | 0.015  | 1.350 | 0.991        |
|                     | 8-66699044-68005926 | CEd                                        | percentage normal births                   | 0.0131 | 0.246  | 0.368 | 0.504        |
|                     | 8-66699044-68005926 | CEm                                        | percentage normal births                   | 0.0107 | 1.585  | 0.711 | <b>0.026</b> |
|                     | 8-66699044-68005926 | NRc                                        | non-return rate cow                        | 0.0089 | -0.269 | 0.682 | 0.693        |
|                     | 8-66699044-68005926 | NRh                                        | non-return rate heifer                     | 0.0117 | -2.011 | 0.868 | <b>0.020</b> |

|                     |                     |                     |                                            |                        |        |        |              |       |
|---------------------|---------------------|---------------------|--------------------------------------------|------------------------|--------|--------|--------------|-------|
| HH2                 | 8-66699044-68005926 | P1                  | survival period 1                          | 0.0135                 | -0.564 | 3.144  | 0.858        |       |
|                     | 8-66699044-68005926 | DFS                 | interval calving to insemination           | 0.0095                 | 1.012  | 0.601  | 0.092        |       |
|                     | 8-66699044-68005926 | GLd                 | gestation length                           | 0.0130                 | 0.111  | 1.198  | 0.926        |       |
|                     | 8-66699044-68005926 | GLm                 | gestation length                           | 0.0127                 | -1.470 | 1.390  | 0.290        |       |
|                     | 8-66699044-68005926 | MBd                 | multiple birth                             | 0.0085                 | -0.308 | 2.022  | 0.879        |       |
|                     | 8-66699044-68005926 | MBm                 | multiple birth                             | 0.0052                 | 6.693  | 2.914  | <b>0.022</b> |       |
|                     | 8-66699044-68005926 | IFLc                | interval first to last insemination cow    | 0.0091                 | -0.169 | 0.567  | 0.766        |       |
|                     | 8-66699044-68005926 | IFLh                | interval first to last insemination heifer | 0.0064                 | 0.286  | 2.222  | 0.898        |       |
| HH3                 | 8-90958661-92084831 | P2b                 | survival bull period 2                     | 0.0103                 | -4.902 | 3.696  | 0.185        |       |
|                     | 8-90958661-92084831 | BWd                 | birth weight                               | 0.0098                 | 0.417  | 1.481  | 0.778        |       |
|                     | 8-90958661-92084831 | BWm                 | birth weight                               | 0.0099                 | -1.201 | 1.623  | 0.460        |       |
|                     | 8-90958661-92084831 | P2h                 | survival heifer period 2                   | 0.0120                 | 5.618  | 5.923  | 0.343        |       |
|                     | 8-90958661-92084831 | SBd                 | percentage live births                     | 0.0172                 | 0.066  | 2.199  | 0.976        |       |
|                     | 8-90958661-92084831 | SBm                 | percentage live births                     | 0.0198                 | -0.275 | 1.424  | 0.847        |       |
|                     | 8-90958661-92084831 | CEd                 | percentage normal births                   | 0.0185                 | 0.120  | 0.475  | 0.800        |       |
|                     | 8-90958661-92084831 | CEm                 | percentage normal births                   | 0.0194                 | 0.360  | 0.778  | 0.644        |       |
|                     | 8-90958661-92084831 | NRc                 | non-return rate cow                        | 0.0201                 | -0.799 | 0.694  | 0.250        |       |
|                     | 8-90958661-92084831 | NRh                 | non-return rate heifer                     | 0.0180                 | -1.737 | 0.937  | 0.064        |       |
|                     | 8-90958661-92084831 | P1                  | survival period 1                          | 0.0116                 | -1.049 | 3.544  | 0.767        |       |
|                     | 8-90958661-92084831 | DFS                 | interval calving to insemination           | 0.0199                 | -0.354 | 0.656  | 0.590        |       |
|                     | 8-90958661-92084831 | GLd                 | gestation length                           | 0.0104                 | -0.404 | 1.471  | 0.784        |       |
|                     | 8-90958661-92084831 | GLm                 | gestation length                           | 0.0096                 | -3.566 | 1.734  | <b>0.040</b> |       |
|                     | 8-90958661-92084831 | MBd                 | multiple birth                             | 0.0079                 | -4.162 | 2.150  | 0.053        |       |
|                     | 8-90958661-92084831 | MBm                 | multiple birth                             | 0.0067                 | 4.195  | 2.686  | 0.118        |       |
|                     | 8-90958661-92084831 | IFLc                | interval first to last insemination cow    | 0.0199                 | -0.672 | 0.618  | 0.277        |       |
|                     | 8-90958661-92084831 | IFLh                | interval first to last insemination heifer | 0.0081                 | 1.032  | 2.146  | 0.631        |       |
|                     | HH5                 | 9-90928417-91823561 | P2b                                        | survival bull period 2 | 0.0142 | -1.899 | 3.329        | 0.568 |
|                     |                     | 9-90928417-91823561 | BWd                                        | birth weight           | 0.0174 | -1.480 | 1.284        | 0.249 |
| 9-90928417-91823561 |                     | BWm                 | birth weight                               | 0.0161                 | -1.009 | 1.430  | 0.481        |       |
| 9-90928417-91823561 |                     | P2h                 | survival heifer period 2                   | 0.0152                 | -6.484 | 5.629  | 0.249        |       |
| 9-90928417-91823561 |                     | SBd                 | percentage live births                     | 0.0212                 | 3.631  | 2.161  | 0.093        |       |
| 9-90928417-91823561 |                     | SBm                 | percentage live births                     | 0.0209                 | -0.067 | 1.548  | 0.966        |       |
| 9-90928417-91823561 |                     | CEd                 | percentage normal births                   | 0.0185                 | 0.605  | 0.529  | 0.252        |       |
| 9-90928417-91823561 |                     | CEm                 | percentage normal births                   | 0.0193                 | 0.641  | 0.871  | 0.462        |       |
| 9-90928417-91823561 |                     | NRc                 | non-return rate cow                        | 0.0194                 | -1.184 | 0.778  | 0.128        |       |
| 9-90928417-91823561 |                     | NRh                 | non-return rate heifer                     | 0.0184                 | -3.973 | 0.985  | #####        |       |
| 9-90928417-91823561 |                     | P1                  | survival period 1                          | 0.0168                 | 1.154  | 3.135  | 0.713        |       |
| 9-90928417-91823561 |                     | DFS                 | interval calving to insemination           | 0.0175                 | 1.289  | 0.767  | 0.093        |       |

|                     |      |                                               |        |        |       |       |
|---------------------|------|-----------------------------------------------|--------|--------|-------|-------|
| 9-90928417-91823561 | GLd  | gestation length                              | 0.0168 | -1.340 | 1.302 | 0.303 |
| 9-90928417-91823561 | GLm  | gestation length                              | 0.0168 | -0.900 | 1.487 | 0.545 |
| 9-90928417-91823561 | MBd  | multiple birth                                | 0.0155 | 3.005  | 1.644 | 0.068 |
| 9-90928417-91823561 | MBm  | multiple birth                                | 0.0100 | -3.082 | 2.498 | 0.217 |
| 9-90928417-91823561 | IFLc | interval first to last<br>insemination cow    | 0.0172 | -0.188 | 0.725 | 0.796 |
| 9-90928417-91823561 | IFLh | interval first to last<br>insemination heifer | 0.0092 | 2.513  | 2.193 | 0.252 |

---

**Supplementary Table S5: Significant ( $p < 0.0000043$ ) GWAS results in Swiss Holstein cattle.**

| <b>trait</b> | <b>trait description</b>                | <b>chr</b> | <b>pos</b> | <b>freq</b> | <b>b-value</b> | <b>var</b> | <b>p-value</b> |
|--------------|-----------------------------------------|------------|------------|-------------|----------------|------------|----------------|
| IFLc         | interval first to last insemination cow | 1          | 69033809   | 0.8974      | 4.77944        | 4.20658    | 4.23E-07       |
| IFLc         | interval first to last insemination cow | 1          | 69047241   | 0.1023      | -4.76315       | 4.16728    | 5.02E-07       |
| NRc          | non-return rate cow                     | 1          | 69047241   | 0.106       | -4.73796       | 4.25449    | 3.29E-06       |
| P2h          | survival heifer period 2                | 1          | 149719167  | 0.0175      | -46.6798       | 74.9974    | 1.64E-06       |
| CEd          | percentage normal births                | 2          | 107940480  | 0.2898      | 1.94556        | 1.55824    | 1.52E-06       |
| P1           | survival period 1                       | 2          | 134467046  | 0.9416      | 16.2273        | 28.9816    | 3.18E-06       |
| SBd          | percentage live births                  | 3          | 19337047   | 0.3526      | 7.33627        | 24.5726    | 8.68E-07       |
| DFS          | interval calving to insemination        | 5          | 88267557   | 0.1925      | 3.04614        | 2.88439    | 2.09E-07       |
| DFS          | interval calving to insemination        | 5          | 88360524   | 0.542       | -3.12001       | 4.83292    | 3.83E-10       |
| IFLc         | interval first to last insemination cow | 5          | 88360524   | 0.5443      | -2.51609       | 3.14048    | 9.19E-08       |
| DFS          | interval calving to insemination        | 5          | 88412132   | 0.5381      | -3.21249       | 5.13007    | 1.54E-11       |
| IFLc         | interval first to last insemination cow | 5          | 88412132   | 0.5361      | -2.13845       | 2.27456    | 1.92E-06       |
| DFS          | interval calving to insemination        | 5          | 88432158   | 0.5625      | 2.41095        | 2.86089    | 3.90E-07       |
| DFS          | interval calving to insemination        | 5          | 88527468   | 0.6533      | -2.76449       | 3.46211    | 5.93E-08       |
| DFS          | interval calving to insemination        | 5          | 88602535   | 0.8915      | 3.45718        | 2.31189    | 1.99E-06       |
| CEd          | percentage normal births                | 5          | 105301690  | 0.1774      | 2.37815        | 1.6507     | 2.86E-06       |
| CEd          | percentage normal births                | 5          | 105408595  | 0.6768      | -2.16924       | 2.05865    | 7.63E-08       |
| CEd          | percentage normal births                | 5          | 105515535  | 0.7425      | -1.90211       | 1.38332    | 3.97E-06       |
| CEd          | percentage normal births                | 5          | 105650306  | 0.4855      | 2.36604        | 2.79673    | 3.67E-07       |
| CEd          | percentage normal births                | 5          | 105683327  | 0.4727      | 2.18739        | 2.3852     | 3.76E-06       |
| CEd          | percentage normal births                | 5          | 105708881  | 0.4717      | 2.24588        | 2.51392    | 1.49E-06       |
| CEd          | percentage normal births                | 5          | 105743393  | 0.1155      | 2.92756        | 1.75095    | 6.25E-08       |
| CEd          | percentage normal births                | 5          | 105756724  | 0.8644      | -3.20507       | 2.40786    | 5.93E-10       |
| IFLc         | interval first to last insemination cow | 5          | 105756724  | 0.8645      | -3.20189       | 2.40132    | 1.96E-06       |
| CEd          | percentage normal births                | 5          | 105760018  | 0.8645      | -3.23479       | 2.45217    | 4.13E-10       |
| IFLc         | interval first to last insemination cow | 5          | 105760018  | 0.8647      | -3.22061       | 2.42759    | 1.72E-06       |
| CEd          | percentage normal births                | 5          | 105771330  | 0.1341      | 3.35265        | 2.60991    | 8.23E-11       |
| CEd          | percentage normal births                | 5          | 105773809  | 0.135       | 3.23064        | 2.4369     | 4.38E-10       |
| IFLc         | interval first to last insemination cow | 5          | 105773809  | 0.1347      | 3.27827        | 2.50551    | 1.14E-06       |
| CEd          | percentage normal births                | 5          | 105776475  | 0.1197      | 3.1708         | 2.11819    | 4.86E-09       |
| CEd          | percentage normal births                | 5          | 105779368  | 0.8645      | -3.14902       | 2.32261    | 1.19E-09       |
| IFLc         | interval first to last insemination cow | 5          | 105779368  | 0.8648      | -3.23661       | 2.45034    | 1.56E-06       |

|      |                                         |   |           |        |          |         |          |
|------|-----------------------------------------|---|-----------|--------|----------|---------|----------|
| CEd  | percentage normal births                | 5 | 105802469 | 0.8    | -2.15009 | 1.47911 | 1.40E-06 |
| CEd  | percentage normal births                | 5 | 105804880 | 0.8001 | -2.15509 | 1.48559 | 1.35E-06 |
| SBd  | percentage live births                  | 5 | 108807160 | 0.0213 | -16.6917 | 11.6289 | 3.54E-06 |
| BWm  | birth weight                            | 6 | 29366667  | 0.6162 | -3.90547 | 7.21441 | 3.32E-06 |
| BWd  | birth weight                            | 6 | 36857907  | 0.8725 | -5.62137 | 7.02941 | 5.57E-07 |
| BWd  | birth weight                            | 6 | 36863269  | 0.873  | -5.18038 | 5.95091 | 4.02E-06 |
| BWd  | birth weight                            | 6 | 36871343  | 0.1275 | 5.31656  | 6.28777 | 1.99E-06 |
| BWd  | birth weight                            | 6 | 37403795  | 0.9706 | -16.0898 | 14.7714 | 2.37E-16 |
| BWm  | birth weight                            | 6 | 37403795  | 0.9686 | -11.9878 | 8.75224 | 1.73E-08 |
| BWd  | birth weight                            | 6 | 39956254  | 0.9791 | -10.2806 | 4.32666 | 1.60E-06 |
| IFLc | interval first to last insemination cow | 6 | 86860291  | 0.4506 | -3.07327 | 4.67639 | 1.24E-09 |
| DFS  | interval calving to insemination        | 6 | 86860291  | 0.4437 | -2.52963 | 3.15901 | 2.28E-06 |
| IFLc | interval first to last insemination cow | 6 | 86877334  | 0.5485 | 2.80286  | 3.89108 | 2.28E-08 |
| DFS  | interval calving to insemination        | 6 | 86924174  | 0.3099 | 2.78888  | 3.32691 | 4.03E-07 |
| DFS  | interval calving to insemination        | 6 | 86936145  | 0.6874 | -2.55622 | 2.8084  | 1.56E-06 |
| DFS  | interval calving to insemination        | 6 | 86940863  | 0.5527 | 4.92791  | 12.0073 | 3.86E-19 |
| IFLc | interval first to last insemination cow | 6 | 86940863  | 0.5468 | 3.52077  | 6.14366 | 1.67E-11 |
| CEm  | percentage normal births                | 6 | 86940863  | 0.569  | 3.34844  | 5.49922 | 1.54E-07 |
| DFS  | interval calving to insemination        | 6 | 86989953  | 0.286  | 2.63626  | 2.83853 | 2.74E-06 |
| DFS  | interval calving to insemination        | 6 | 86992277  | 0.2852 | 2.74068  | 3.06247 | 1.21E-06 |
| DFS  | interval calving to insemination        | 6 | 87003480  | 0.6828 | -3.12783 | 4.23789 | 3.61E-09 |
| DFS  | interval calving to insemination        | 6 | 87021332  | 0.6535 | -2.96865 | 3.99121 | 1.76E-08 |
| DFS  | interval calving to insemination        | 6 | 87068809  | 0.4889 | 3.89563  | 7.5842  | 3.71E-13 |
| IFLc | interval first to last insemination cow | 6 | 87068809  | 0.4829 | 2.67017  | 3.56072 | 1.34E-07 |
| DFS  | interval calving to insemination        | 6 | 87090740  | 0.3193 | 2.7051   | 3.18115 | 3.69E-06 |
| DFS  | interval calving to insemination        | 6 | 87184768  | 0.4252 | -5.02447 | 12.3403 | 8.80E-18 |
| IFLc | interval first to last insemination cow | 6 | 87184768  | 0.4312 | -3.59539 | 6.34108 | 8.73E-11 |
| DFS  | interval calving to insemination        | 6 | 87213962  | 0.5    | -3.28113 | 5.38291 | 5.84E-10 |
| IFLc | interval first to last insemination cow | 6 | 87213962  | 0.5043 | -2.57098 | 3.30472 | 2.80E-07 |
| DFS  | interval calving to insemination        | 6 | 87224275  | 0.711  | -2.81423 | 3.25445 | 8.40E-08 |
| DFS  | interval calving to insemination        | 6 | 87324678  | 0.5758 | 4.31928  | 9.11373 | 5.13E-14 |
| IFLc | interval first to last insemination cow | 6 | 87324678  | 0.5695 | 2.89274  | 4.10308 | 9.64E-08 |
| NRc  | non-return rate cow                     | 6 | 98196576  | 0.9512 | -4.73151 | 2.07661 | 3.35E-06 |
| NRh  | non-return rate heifer                  | 6 | 101541974 | 0.7762 | 4.41131  | 6.76162 | 7.05E-10 |
| NRh  | non-return rate heifer                  | 6 | 101564868 | 0.4729 | -3.12493 | 4.86822 | 2.51E-07 |
| NRh  | non-return rate heifer                  | 6 | 102017062 | 0.267  | -3.41854 | 4.57423 | 7.67E-08 |
| CEm  | percentage normal births                | 6 | 110482099 | 0.6273 | -2.82525 | 3.73219 | 2.92E-07 |
| CEm  | percentage normal births                | 6 | 110714073 | 0.1949 | -3.68073 | 4.25172 | 4.81E-07 |

|      |                                         |    |          |        |          |         |          |
|------|-----------------------------------------|----|----------|--------|----------|---------|----------|
| CEm  | percentage normal births                | 7  | 46396334 | 0.6315 | -3.69129 | 6.34177 | 2.21E-06 |
| CEd  | percentage normal births                | 7  | 90622467 | 0.9764 | 4.18709  | 0.80944 | 4.69E-07 |
| CEd  | percentage normal births                | 7  | 90851664 | 0.9136 | 3.18088  | 1.59754 | 4.23E-10 |
| CEd  | percentage normal births                | 7  | 90855265 | 0.0663 | -4.42143 | 2.41881 | 3.74E-14 |
| NRc  | non-return rate cow                     | 7  | 90855265 | 0.0698 | -4.38992 | 2.50398 | 1.17E-07 |
| IFLc | interval first to last insemination cow | 7  | 90855265 | 0.0735 | -3.55809 | 1.72317 | 2.22E-06 |
| CEd  | percentage normal births                | 7  | 90882079 | 0.8892 | 2.42317  | 1.15731 | 1.13E-07 |
| CEd  | percentage normal births                | 7  | 90887932 | 0.9336 | 4.43208  | 2.43508 | 2.56E-14 |
| NRc  | non-return rate cow                     | 7  | 90887932 | 0.93   | 4.47941  | 2.61086 | 5.87E-08 |
| IFLc | interval first to last insemination cow | 7  | 90887932 | 0.9265 | 3.57993  | 1.74643 | 1.78E-06 |
| CEd  | percentage normal births                | 7  | 90966315 | 0.4206 | -1.97243 | 1.8962  | 7.02E-07 |
| SBm  | percentage live births                  | 8  | 90073503 | 0.0891 | -7.8033  | 9.88    | 1.89E-06 |
| SBm  | percentage live births                  | 8  | 90099064 | 0.9109 | 7.89931  | 10.1293 | 1.47E-06 |
| NRh  | non-return rate heifer                  | 9  | 50198332 | 0.8559 | 5.60323  | 7.74657 | 1.71E-06 |
| CEd  | percentage normal births                | 10 | 12252829 | 0.9186 | 2.99722  | 1.34335 | 9.48E-08 |
| CEd  | percentage normal births                | 10 | 12271119 | 0.082  | -3.04302 | 1.39387 | 4.85E-08 |
| CEd  | percentage normal births                | 10 | 12271909 | 0.918  | 3.04302  | 1.39387 | 4.85E-08 |
| GLm  | gestation length                        | 10 | 13391218 | 0.5122 | 3.72298  | 6.92617 | 4.04E-06 |
| GLm  | gestation length                        | 10 | 13433297 | 0.5101 | 3.77165  | 7.10975 | 3.18E-06 |
| SBd  | percentage live births                  | 11 | 10060004 | 0.098  | -9.15597 | 14.8188 | 2.05E-06 |
| MBm  | multiple birth                          | 11 | 31004983 | 0.5313 | 5.25488  | 13.7527 | 1.23E-07 |
| MBm  | multiple birth                          | 11 | 31056487 | 0.4956 | -4.95885 | 12.2941 | 4.25E-07 |
| MBm  | multiple birth                          | 11 | 37136773 | 0.8691 | -6.3751  | 9.24598 | 3.00E-06 |
| P2h  | survival heifer period 2                | 11 | 72258221 | 0.9339 | 26.1006  | 84.1489 | 3.60E-06 |
| P2h  | survival heifer period 2                | 11 | 72280075 | 0.0542 | -35.8673 | 131.856 | 4.90E-08 |
| P2h  | survival heifer period 2                | 11 | 77958994 | 0.0503 | -43.6852 | 182.257 | 5.65E-11 |
| CEm  | percentage normal births                | 11 | 78311315 | 0.6201 | 2.87645  | 3.89824 | 2.37E-07 |
| BWd  | birth weight                            | 14 | 22797143 | 0.0259 | -9.11929 | 4.18935 | 2.94E-06 |
| BWd  | birth weight                            | 14 | 22802830 | 0.9741 | 9.11929  | 4.18935 | 2.94E-06 |
| BWd  | birth weight                            | 14 | 22830132 | 0.9809 | 10.3791  | 4.03605 | 2.77E-06 |
| BWd  | birth weight                            | 14 | 22899088 | 0.0281 | -10.9614 | 6.55315 | 5.28E-09 |
| BWd  | birth weight                            | 14 | 22906023 | 0.9847 | 11.2178  | 3.79794 | 3.98E-06 |
| BWd  | birth weight                            | 14 | 22916046 | 0.9635 | 8.0847   | 4.60277 | 1.12E-06 |
| BWd  | birth weight                            | 14 | 22933624 | 0.0277 | -11.0909 | 6.61752 | 4.99E-09 |
| BWd  | birth weight                            | 14 | 22999212 | 0.0892 | -5.9995  | 5.84863 | 3.54E-07 |
| BWd  | birth weight                            | 14 | 23039779 | 0.9721 | 10.6759  | 6.18236 | 4.21E-08 |
| BWd  | birth weight                            | 14 | 23043305 | 0.0267 | -10.5456 | 5.78444 | 9.92E-08 |
| BWd  | birth weight                            | 14 | 23047927 | 0.0267 | -10.5456 | 5.78444 | 9.92E-08 |
| BWd  | birth weight                            | 14 | 23060216 | 0.9792 | 10.0754  | 4.14035 | 3.77E-06 |
| BWd  | birth weight                            | 14 | 23060870 | 0.9722 | 10.6777  | 6.16754 | 4.34E-08 |
| BWd  | birth weight                            | 14 | 23081092 | 0.0211 | -10.9456 | 4.95863 | 5.02E-07 |
| BWd  | birth weight                            | 14 | 23084813 | 0.0212 | -11.0035 | 5.02942 | 4.18E-07 |
| BWd  | birth weight                            | 14 | 23086563 | 0.0212 | -11.0035 | 5.02942 | 4.18E-07 |

|      |                                         |    |          |        |          |          |          |
|------|-----------------------------------------|----|----------|--------|----------|----------|----------|
| BWd  | birth weight                            | 14 | 23088684 | 0.9786 | 11.07    | 5.12725  | 3.03E-07 |
| BWd  | birth weight                            | 14 | 23095328 | 0.9726 | 10.5646  | 5.95466  | 7.38E-08 |
| BWd  | birth weight                            | 14 | 23102372 | 0.0212 | -11.0035 | 5.02942  | 4.18E-07 |
| BWd  | birth weight                            | 14 | 23232498 | 0.07   | -7.50141 | 7.32894  | 8.56E-09 |
| CEd  | percentage normal births                | 14 | 23232498 | 0.0316 | 3.91488  | 0.938341 | 1.57E-08 |
| CEd  | percentage normal births                | 14 | 23262536 | 0.015  | 4.93483  | 0.717373 | 2.75E-07 |
| BWd  | birth weight                            | 14 | 23262536 | 0.0412 | -7.50569 | 4.44892  | 2.65E-06 |
| CEd  | percentage normal births                | 14 | 23285130 | 0.0151 | 5.03727  | 0.752905 | 1.41E-07 |
| BWd  | birth weight                            | 14 | 23285130 | 0.0417 | -7.62025 | 4.64436  | 1.76E-06 |
| BWd  | birth weight                            | 14 | 23321577 | 0.966  | 8.51867  | 4.76028  | 2.14E-06 |
| BWd  | birth weight                            | 14 | 23389588 | 0.962  | 9.453    | 6.52659  | 5.09E-08 |
| BWd  | birth weight                            | 14 | 23575960 | 0.9848 | 11.3247  | 3.83161  | 2.68E-06 |
| BWd  | birth weight                            | 14 | 23617053 | 0.9797 | 10.6633  | 4.51765  | 4.34E-07 |
| BWd  | birth weight                            | 14 | 23622754 | 0.0234 | -9.58049 | 4.19861  | 2.38E-06 |
| BWd  | birth weight                            | 14 | 23630896 | 0.0261 | -10.5782 | 5.68701  | 5.23E-08 |
| BWd  | birth weight                            | 14 | 23639458 | 0.9767 | 9.71799  | 4.30584  | 1.22E-06 |
| BWd  | birth weight                            | 14 | 23652804 | 0.0224 | -12.0853 | 6.39631  | 5.78E-09 |
| P1   | survival period 1                       | 15 | 57184911 | 0.386  | -8.09169 | 31.0346  | 3.38E-06 |
| CEd  | percentage normal births                | 17 | 67330305 | 0.9011 | 2.70764  | 1.3064   | 1.61E-06 |
| CEd  | percentage normal births                | 17 | 68274420 | 0.5043 | -1.7355  | 1.50588  | 2.40E-06 |
| CEd  | percentage normal births                | 17 | 68292838 | 0.5632 | 1.82346  | 1.63592  | 1.89E-07 |
| CEd  | percentage normal births                | 17 | 68308036 | 0.5043 | -1.73365 | 1.50265  | 2.44E-06 |
| CEd  | percentage normal births                | 17 | 68825904 | 0.9038 | 3.22505  | 1.80924  | 6.55E-07 |
| CEd  | percentage normal births                | 17 | 69163976 | 0.0962 | -3.3708  | 1.97529  | 1.73E-07 |
| IFLc | interval first to last insemination cow | 17 | 69230601 | 0.4261 | 2.30624  | 2.60122  | 7.35E-07 |
| DFS  | interval calving to insemination        | 17 | 69259482 | 0.3612 | 2.82006  | 3.66989  | 1.01E-08 |
| NRc  | non-return rate cow                     | 17 | 69259482 | 0.3614 | 2.34125  | 2.53004  | 2.89E-06 |
| IFLc | interval first to last insemination cow | 17 | 69259482 | 0.3615 | 2.15301  | 2.13982  | 3.60E-06 |
| DFS  | interval calving to insemination        | 17 | 69283790 | 0.3254 | 2.82387  | 3.50113  | 5.10E-08 |
| IFLc | interval first to last insemination cow | 17 | 69283790 | 0.326  | 2.53954  | 2.83414  | 2.14E-07 |
| DFS  | interval calving to insemination        | 17 | 69337705 | 0.6046 | -2.34973 | 2.63969  | 2.90E-06 |
| DFS  | interval calving to insemination        | 17 | 69351312 | 0.41   | 2.59047  | 3.24661  | 2.39E-07 |
| CEd  | percentage normal births                | 17 | 69986216 | 0.8948 | 3.04802  | 1.74846  | 1.18E-07 |
| SBm  | percentage live births                  | 17 | 72670466 | 0.7917 | 5.43382  | 9.73703  | 1.56E-06 |
| SBm  | percentage live births                  | 17 | 72697904 | 0.203  | -5.37397 | 9.34603  | 3.05E-06 |
| DFS  | interval calving to insemination        | 18 | 42598286 | 0.8559 | 2.86074  | 2.01857  | 7.89E-08 |
| IFLc | interval first to last insemination cow | 18 | 43854199 | 0.8454 | 2.78517  | 2.02739  | 3.59E-06 |
| IFLc | interval first to last insemination cow | 18 | 43887966 | 0.8428 | 2.91637  | 2.25392  | 8.38E-07 |
| DFS  | interval calving to insemination        | 18 | 44177327 | 0.8963 | 7.70306  | 11.0323  | 2.05E-21 |

|      |                                         |    |          |        |          |         |          |
|------|-----------------------------------------|----|----------|--------|----------|---------|----------|
| IFLc | interval first to last insemination cow | 18 | 44177327 | 0.8942 | 6.49561  | 7.9842  | 1.83E-17 |
| DFS  | interval calving to insemination        | 18 | 44323486 | 0.6044 | -2.3653  | 2.67541 | 2.51E-07 |
| DFS  | interval calving to insemination        | 18 | 44383419 | 0.3242 | -2.35892 | 2.43823 | 7.02E-07 |
| DFS  | interval calving to insemination        | 18 | 44724263 | 0.9002 | 3.79183  | 2.58362 | 4.84E-07 |
| IFLc | interval first to last insemination cow | 18 | 44724263 | 0.8974 | 3.53492  | 2.30196 | 5.84E-07 |
| DFS  | interval calving to insemination        | 18 | 44765510 | 0.9017 | 4.49897  | 3.58793 | 8.10E-09 |
| IFLc | interval first to last insemination cow | 18 | 44765510 | 0.8988 | 4.02189  | 2.94295 | 3.92E-08 |
| DFS  | interval calving to insemination        | 18 | 45060867 | 0.09   | -5.99245 | 5.88127 | 1.15E-11 |
| IFLc | interval first to last insemination cow | 18 | 45060867 | 0.0929 | -5.07989 | 4.34742 | 9.18E-10 |
| IFLc | interval first to last insemination cow | 18 | 45542297 | 0.0997 | -5.42941 | 5.29141 | 4.32E-13 |
| DFS  | interval calving to insemination        | 18 | 45542297 | 0.0961 | -5.41603 | 5.09592 | 1.52E-11 |
| IFLc | interval first to last insemination cow | 18 | 45697720 | 0.129  | -3.56083 | 2.84899 | 2.54E-08 |
| DFS  | interval calving to insemination        | 18 | 45697720 | 0.1251 | -3.43465 | 2.58192 | 4.53E-07 |
| DFS  | interval calving to insemination        | 18 | 45744538 | 0.3575 | -2.30753 | 2.44611 | 1.14E-06 |
| DFS  | interval calving to insemination        | 18 | 46510336 | 0.625  | 2.9036   | 3.95198 | 1.79E-06 |
| DFS  | interval calving to insemination        | 18 | 46515971 | 0.6252 | 2.94422  | 4.06257 | 1.27E-06 |
| DFS  | interval calving to insemination        | 18 | 46523750 | 0.3741 | -3.00799 | 4.23709 | 6.76E-07 |
| DFS  | interval calving to insemination        | 18 | 46524464 | 0.6261 | 2.98032  | 4.15887 | 8.18E-07 |
| DFS  | interval calving to insemination        | 18 | 47927237 | 0.8976 | 4.26643  | 3.34631 | 2.90E-07 |
| GLm  | gestation length                        | 18 | 54816033 | 0.2689 | 4.74451  | 8.85177 | 1.27E-06 |
| BWd  | birth weight                            | 18 | 55556538 | 0.8868 | -7.33921 | 10.812  | 5.36E-09 |
| CEd  | percentage normal births                | 18 | 55556538 | 0.9459 | 3.75228  | 1.44073 | 5.81E-09 |
| CEd  | percentage normal births                | 18 | 56539007 | 0.7802 | 3.27459  | 3.67739 | 3.74E-16 |
| BWd  | birth weight                            | 18 | 56539007 | 0.7196 | -4.44415 | 7.96999 | 1.71E-07 |
| GLd  | gestation length                        | 18 | 56539007 | 0.7205 | -4.10962 | 6.8027  | 8.35E-07 |
| CEd  | percentage normal births                | 18 | 56559911 | 0.9155 | 6.14918  | 5.85247 | 2.04E-28 |
| CEm  | percentage normal births                | 18 | 56559911 | 0.9148 | 6.98     | 7.59159 | 6.42E-15 |
| BWd  | birth weight                            | 18 | 56559911 | 0.8528 | -7.2949  | 13.3607 | 1.03E-11 |
| NRc  | non-return rate cow                     | 18 | 56559911 | 0.9111 | 4.0433   | 2.64877 | 2.03E-07 |
| BWm  | birth weight                            | 18 | 56559911 | 0.8488 | -5.91876 | 8.9922  | 5.17E-07 |
| GLd  | gestation length                        | 18 | 56559911 | 0.8535 | -5.08535 | 6.46675 | 1.31E-06 |
| SBm  | percentage live births                  | 18 | 56559911 | 0.9119 | 7.73311  | 9.61164 | 1.58E-06 |
| CEd  | percentage normal births                | 18 | 56560944 | 0.8345 | 3.20183  | 2.83168 | 6.56E-13 |
| BWd  | birth weight                            | 18 | 56560944 | 0.7957 | -5.20535 | 8.80812 | 9.09E-09 |
| CEd  | percentage normal births                | 18 | 56567219 | 0.67   | 1.86704  | 1.54144 | 4.71E-08 |
| BWd  | birth weight                            | 18 | 56567219 | 0.6093 | -3.82354 | 6.96028 | 3.27E-07 |
| CEm  | percentage normal births                | 18 | 56567219 | 0.6651 | 2.73496  | 3.33198 | 8.94E-07 |
| CEd  | percentage normal births                | 18 | 56652412 | 0.194  | -2.81204 | 2.47268 | 5.29E-12 |
| CEm  | percentage normal births                | 18 | 56652412 | 0.1992 | -3.14505 | 3.15583 | 2.15E-06 |



|      |                                         |    |          |        |          |         |          |
|------|-----------------------------------------|----|----------|--------|----------|---------|----------|
| CEd  | percentage normal births                | 18 | 56679475 | 0.7184 | -1.81635 | 1.33485 | 1.13E-06 |
| CEd  | percentage normal births                | 18 | 56716572 | 0.7247 | 2.28995  | 2.0925  | 1.10E-08 |
| BWd  | birth weight                            | 18 | 56716572 | 0.7435 | -4.6132  | 8.11763 | 5.68E-08 |
| BWm  | birth weight                            | 18 | 56716572 | 0.7421 | -4.37902 | 7.33929 | 3.26E-06 |
| CEd  | percentage normal births                | 18 | 56780040 | 0.3549 | -2.70388 | 3.34764 | 1.49E-14 |
| GLd  | gestation length                        | 18 | 56780040 | 0.3375 | 4.71681  | 9.94984 | 5.95E-10 |
| BWd  | birth weight                            | 18 | 56780040 | 0.3366 | 4.42013  | 8.72525 | 1.13E-08 |
| BWm  | birth weight                            | 18 | 56780040 | 0.3358 | 4.58401  | 9.37301 | 8.56E-08 |
| CEd  | percentage normal births                | 18 | 57032285 | 0.7809 | 3.29788  | 3.72122 | 5.44E-14 |
| CEd  | percentage normal births                | 18 | 57057494 | 0.9279 | 7.72536  | 7.98914 | 2.21E-40 |
| CEm  | percentage normal births                | 18 | 57057494 | 0.9259 | 6.47736  | 5.75699 | 5.95E-12 |
| BWd  | birth weight                            | 18 | 57057494 | 0.8553 | -7.42343 | 13.6394 | 1.44E-11 |
| BWm  | birth weight                            | 18 | 57057494 | 0.8525 | -6.73744 | 11.414  | 2.90E-08 |
| SBm  | percentage live births                  | 18 | 57057494 | 0.9221 | 9.25134  | 12.2974 | 4.36E-08 |
| IFLc | interval first to last insemination cow | 18 | 57057494 | 0.927  | 3.70929  | 1.86174 | 9.54E-07 |
| NRc  | non-return rate cow                     | 18 | 57057494 | 0.9244 | 4.03142  | 2.27142 | 1.04E-06 |
| GLd  | gestation length                        | 18 | 57057494 | 0.855  | -5.152   | 6.5819  | 1.60E-06 |
| GLm  | gestation length                        | 18 | 57057494 | 0.855  | -5.67123 | 7.97412 | 2.96E-06 |
| CEd  | percentage normal births                | 18 | 57077568 | 0.0657 | -10.5384 | 13.6372 | 2.75E-57 |
| CEm  | percentage normal births                | 18 | 57077568 | 0.0668 | -9.48568 | 11.219  | 3.38E-19 |
| BWd  | birth weight                            | 18 | 57077568 | 0.1224 | 9.50616  | 19.4204 | 1.14E-14 |
| BWm  | birth weight                            | 18 | 57077568 | 0.126  | 8.92199  | 17.5346 | 4.74E-11 |
| IFLc | interval first to last insemination cow | 18 | 57077568 | 0.0675 | -5.32075 | 3.56296 | 4.15E-10 |
| SBm  | percentage live births                  | 18 | 57077568 | 0.0698 | -11.162  | 16.173  | 4.84E-09 |
| NRc  | non-return rate cow                     | 18 | 57077568 | 0.0695 | -5.23659 | 3.54456 | 1.07E-08 |
| GLm  | gestation length                        | 18 | 57077568 | 0.1219 | 7.7026   | 12.7032 | 1.61E-08 |
| GLd  | gestation length                        | 18 | 57077568 | 0.1215 | 6.62554  | 9.37037 | 4.29E-08 |
| SBd  | percentage live births                  | 18 | 57077568 | 0.0861 | -12.8935 | 26.1747 | 2.87E-07 |
| CEd  | percentage normal births                | 18 | 57106651 | 0.6622 | 2.06308  | 1.90417 | 4.14E-08 |
| CEd  | percentage normal births                | 18 | 57127311 | 0.2669 | -3.34799 | 4.38643 | 7.67E-18 |
| BWd  | birth weight                            | 18 | 57127311 | 0.3466 | 3.85683  | 6.73767 | 1.26E-06 |
| CEd  | percentage normal births                | 18 | 57136340 | 0.2463 | -3.83754 | 5.46824 | 9.56E-21 |
| CEm  | percentage normal births                | 18 | 57136340 | 0.2461 | -3.36468 | 4.2005  | 3.13E-07 |
| CEd  | percentage normal births                | 18 | 57137406 | 0.2463 | -3.82721 | 5.43829 | 1.27E-20 |
| CEm  | percentage normal births                | 18 | 57137406 | 0.246  | -3.37446 | 4.22474 | 2.91E-07 |
| CEd  | percentage normal births                | 18 | 57138872 | 0.2463 | -3.83023 | 5.44708 | 1.19E-20 |
| CEm  | percentage normal births                | 18 | 57138872 | 0.246  | -3.37446 | 4.22474 | 2.91E-07 |
| CEd  | percentage normal births                | 18 | 57139571 | 0.0658 | -10.3493 | 13.1683 | 1.75E-56 |
| CEm  | percentage normal births                | 18 | 57139571 | 0.0669 | -9.03916 | 10.1979 | 5.74E-18 |
| BWd  | birth weight                            | 18 | 57139571 | 0.1227 | 9.8487   | 20.8825 | 1.09E-15 |
| BWm  | birth weight                            | 18 | 57139571 | 0.126  | 9.25105  | 18.8547 | 9.06E-12 |
| GLm  | gestation length                        | 18 | 57139571 | 0.122  | 8.37305  | 15.0203 | 7.47E-10 |
| GLd  | gestation length                        | 18 | 57139571 | 0.1216 | 7.15903  | 10.9523 | 2.93E-09 |

|      |                                         |    |          |        |          |         |          |
|------|-----------------------------------------|----|----------|--------|----------|---------|----------|
| IFLc | interval first to last insemination cow | 18 | 57139571 | 0.0674 | -4.90462 | 3.02615 | 5.81E-09 |
| SBm  | percentage live births                  | 18 | 57139571 | 0.0699 | -10.8628 | 15.3411 | 8.55E-09 |
| NRc  | non-return rate cow                     | 18 | 57139571 | 0.0696 | -4.55497 | 2.68573 | 4.88E-07 |
| SBd  | percentage live births                  | 18 | 57139571 | 0.0863 | -12.5063 | 24.66   | 5.75E-07 |
| CEd  | percentage normal births                | 18 | 57139575 | 0.9342 | 10.3493  | 13.1683 | 1.75E-56 |
| CEm  | percentage normal births                | 18 | 57139575 | 0.9331 | 9.03916  | 10.1979 | 5.74E-18 |
| BWd  | birth weight                            | 18 | 57139575 | 0.8773 | -9.8487  | 20.8825 | 1.09E-15 |
| BWm  | birth weight                            | 18 | 57139575 | 0.874  | -9.25105 | 18.8547 | 9.06E-12 |
| GLm  | gestation length                        | 18 | 57139575 | 0.878  | -8.37305 | 15.0203 | 7.47E-10 |
| GLd  | gestation length                        | 18 | 57139575 | 0.8784 | -7.15903 | 10.9523 | 2.93E-09 |
| IFLc | interval first to last insemination cow | 18 | 57139575 | 0.9326 | 4.90462  | 3.02615 | 5.81E-09 |
| SBm  | percentage live births                  | 18 | 57139575 | 0.9301 | 10.8628  | 15.3411 | 8.55E-09 |
| NRc  | non-return rate cow                     | 18 | 57139575 | 0.9304 | 4.55497  | 2.68573 | 4.88E-07 |
| SBd  | percentage live births                  | 18 | 57139575 | 0.9137 | 12.5063  | 24.66   | 5.75E-07 |
| CEd  | percentage normal births                | 18 | 57151314 | 0.3313 | -2.17489 | 2.0958  | 6.27E-10 |
| GLm  | gestation length                        | 18 | 57151314 | 0.3621 | 4.69558  | 10.1861 | 2.55E-08 |
| CEm  | percentage normal births                | 18 | 57151314 | 0.3412 | -3.06008 | 4.20958 | 7.12E-08 |
| BWd  | birth weight                            | 18 | 57151314 | 0.3633 | 3.94976  | 7.21732 | 1.93E-07 |
| BWm  | birth weight                            | 18 | 57151314 | 0.3655 | 3.86346  | 6.92337 | 4.18E-06 |
| CEd  | percentage normal births                | 18 | 57718863 | 0.566  | 1.69741  | 1.41553 | 1.43E-06 |
| CEd  | percentage normal births                | 18 | 57741397 | 0.7012 | 4.40735  | 8.13929 | 3.18E-28 |
| BWd  | birth weight                            | 18 | 57741397 | 0.6826 | -3.93108 | 6.69653 | 2.05E-06 |
| CEd  | percentage normal births                | 18 | 57780453 | 0.3544 | 2.33367  | 2.49214 | 4.49E-09 |
| CEd  | percentage normal births                | 18 | 57780512 | 0.6455 | -2.41612 | 2.67163 | 1.68E-09 |
| CEd  | percentage normal births                | 18 | 57836752 | 0.6412 | -2.28051 | 2.39312 | 1.21E-08 |
| CEd  | percentage normal births                | 18 | 57893557 | 0.7723 | 3.43072  | 4.13942 | 1.55E-16 |
| BWd  | birth weight                            | 18 | 57893557 | 0.7313 | -5.52327 | 11.9904 | 3.96E-11 |
| CEm  | percentage normal births                | 18 | 57893557 | 0.7667 | 3.11222  | 3.46473 | 2.26E-06 |
| CEd  | percentage normal births                | 18 | 57916024 | 0.7243 | 2.2844   | 2.08397 | 7.16E-09 |
| BWd  | birth weight                            | 18 | 57916024 | 0.691  | -3.68176 | 5.78826 | 3.49E-06 |
| BWd  | birth weight                            | 18 | 57916335 | 0.3891 | 3.55419  | 6.00526 | 1.26E-06 |
| CEd  | percentage normal births                | 18 | 57967581 | 0.5946 | 1.87905  | 1.70216 | 1.21E-06 |
| CEd  | percentage normal births                | 18 | 57993345 | 0.5959 | 2.80096  | 3.77831 | 1.47E-13 |
| CEd  | percentage normal births                | 18 | 58065996 | 0.6082 | 3.0994   | 4.57835 | 6.02E-14 |
| BWd  | birth weight                            | 18 | 58065996 | 0.6012 | -4.64987 | 10.3675 | 1.93E-09 |
| CEd  | percentage normal births                | 18 | 58156599 | 0.7244 | 2.78698  | 3.10109 | 4.93E-11 |
| GLd  | gestation length                        | 18 | 58156599 | 0.7315 | -4.43257 | 7.71803 | 1.26E-07 |
| BWm  | birth weight                            | 18 | 58156599 | 0.7305 | -4.95511 | 9.66747 | 1.88E-07 |
| BWd  | birth weight                            | 18 | 58156599 | 0.7325 | -4.29457 | 7.22752 | 5.41E-07 |
| CEd  | percentage normal births                | 18 | 58213698 | 0.7242 | 2.82298  | 3.18332 | 2.68E-11 |
| BWd  | birth weight                            | 18 | 58213698 | 0.7351 | -4.54467 | 8.04375 | 1.12E-07 |
| BWm  | birth weight                            | 18 | 58213698 | 0.7341 | -4.89516 | 9.35373 | 2.57E-07 |
| CEd  | percentage normal births                | 18 | 58303038 | 0.7184 | -2.55516 | 2.64132 | 3.46E-08 |

|      |                                         |    |          |        |          |         |          |
|------|-----------------------------------------|----|----------|--------|----------|---------|----------|
| CEd  | percentage normal births                | 18 | 58328337 | 0.6403 | 3.03431  | 4.24129 | 1.74E-12 |
| BWm  | birth weight                            | 18 | 58328337 | 0.6416 | -5.20981 | 12.4831 | 7.31E-09 |
| BWd  | birth weight                            | 18 | 58328337 | 0.6444 | -4.47628 | 9.18325 | 2.98E-08 |
| CEd  | percentage normal births                | 18 | 58337557 | 0.5727 | 2.18611  | 2.33906 | 2.20E-08 |
| BWd  | birth weight                            | 18 | 58337557 | 0.5601 | -3.71572 | 6.80348 | 1.07E-06 |
| BWm  | birth weight                            | 18 | 58337557 | 0.5573 | -4.06836 | 8.16702 | 1.66E-06 |
| CEd  | percentage normal births                | 18 | 58672622 | 0.3874 | -2.19922 | 2.29559 | 1.72E-08 |
| BWm  | birth weight                            | 18 | 58672622 | 0.3818 | 4.16917  | 8.2051  | 1.46E-06 |
| BWd  | birth weight                            | 18 | 58672622 | 0.3789 | 3.60072  | 6.10262 | 3.66E-06 |
| CEd  | percentage normal births                | 18 | 58968919 | 0.6382 | 2.55223  | 3.00825 | 9.06E-10 |
| BWm  | birth weight                            | 18 | 58968919 | 0.6182 | -4.5484  | 9.76566 | 2.77E-07 |
| BWd  | birth weight                            | 18 | 58968919 | 0.6185 | -4.01134 | 7.59386 | 4.37E-07 |
| CEd  | percentage normal births                | 18 | 59051322 | 0.6479 | 2.87713  | 3.77681 | 9.98E-14 |
| CEd  | percentage normal births                | 18 | 59186046 | 0.2687 | 2.34612  | 2.16302 | 1.37E-07 |
| CEd  | percentage normal births                | 18 | 59319065 | 0.22   | -3.89435 | 5.20436 | 1.27E-19 |
| CEm  | percentage normal births                | 18 | 59319065 | 0.2282 | -3.74157 | 4.93191 | 5.24E-08 |
| BWd  | birth weight                            | 18 | 59319065 | 0.3121 | 4.36411  | 8.17727 | 1.98E-07 |
| BWm  | birth weight                            | 18 | 59319065 | 0.3146 | 4.59457  | 9.10337 | 8.07E-07 |
| CEd  | percentage normal births                | 18 | 59319876 | 0.8434 | 5.49078  | 7.96301 | 2.06E-29 |
| BWm  | birth weight                            | 18 | 59319876 | 0.7811 | -7.36296 | 18.5368 | 1.60E-12 |
| BWd  | birth weight                            | 18 | 59319876 | 0.7823 | -6.48116 | 14.3076 | 4.24E-12 |
| CEm  | percentage normal births                | 18 | 59319876 | 0.8392 | 5.37711  | 7.80527 | 4.79E-12 |
| IFLc | interval first to last insemination cow | 18 | 59319876 | 0.8362 | 3.59126  | 3.53318 | 1.44E-08 |
| NRc  | non-return rate cow                     | 18 | 59319876 | 0.8373 | 3.57774  | 3.48832 | 1.61E-07 |
| CEd  | percentage normal births                | 18 | 59319899 | 0.1566 | -5.49078 | 7.96301 | 2.06E-29 |
| BWm  | birth weight                            | 18 | 59319899 | 0.2189 | 7.36296  | 18.5368 | 1.60E-12 |
| BWd  | birth weight                            | 18 | 59319899 | 0.2177 | 6.48116  | 14.3076 | 4.24E-12 |
| CEm  | percentage normal births                | 18 | 59319899 | 0.1608 | -5.37711 | 7.80527 | 4.79E-12 |
| IFLc | interval first to last insemination cow | 18 | 59319899 | 0.1638 | -3.59126 | 3.53318 | 1.44E-08 |
| NRc  | non-return rate cow                     | 18 | 59319899 | 0.1627 | -3.57774 | 3.48832 | 1.61E-07 |
| CEd  | percentage normal births                | 18 | 59355012 | 0.2118 | 3.98515  | 5.30323 | 8.38E-12 |
| CEd  | percentage normal births                | 18 | 59502602 | 0.5733 | 2.54231  | 3.16229 | 8.19E-11 |
| CEd  | percentage normal births                | 18 | 59658540 | 0.8714 | 4.15934  | 3.87793 | 1.81E-15 |
| BWd  | birth weight                            | 18 | 59658540 | 0.8331 | -5.8348  | 9.46644 | 1.44E-08 |
| CEm  | percentage normal births                | 18 | 59658540 | 0.8724 | 4.66406  | 4.84336 | 2.07E-08 |
| BWm  | birth weight                            | 18 | 59658540 | 0.8276 | -6.11119 | 10.6571 | 6.20E-08 |
| CEd  | percentage normal births                | 18 | 59723348 | 0.0633 | 4.47874  | 2.37861 | 9.65E-11 |
| CEd  | percentage normal births                | 18 | 59772517 | 0.1322 | -5.95853 | 8.14662 | 4.86E-27 |
| BWd  | birth weight                            | 18 | 59772517 | 0.1733 | 7.2403   | 15.0222 | 4.58E-12 |
| CEm  | percentage normal births                | 18 | 59772517 | 0.1311 | -5.60267 | 7.15266 | 9.99E-11 |
| BWm  | birth weight                            | 18 | 59772517 | 0.1787 | 7.28515  | 15.5755 | 3.00E-10 |
| IFLc | interval first to last insemination cow | 18 | 59772517 | 0.1345 | -3.7576  | 3.28749 | 1.47E-07 |

|      |                                            |    |          |        |          |         |          |
|------|--------------------------------------------|----|----------|--------|----------|---------|----------|
| GLd  | gestation length                           | 18 | 59772517 | 0.1714 | 5.35066  | 8.13102 | 2.09E-07 |
| GLm  | gestation length                           | 18 | 59772517 | 0.1734 | 5.54695  | 8.81936 | 1.78E-06 |
| CEd  | percentage normal births                   | 18 | 60109062 | 0.5364 | 2.43188  | 2.94139 | 6.33E-09 |
| BWd  | birth weight                               | 18 | 60109062 | 0.4857 | -3.78034 | 7.13963 | 1.22E-06 |
| CEd  | percentage normal births                   | 18 | 60111726 | 0.3313 | 2.43397  | 2.62507 | 9.88E-07 |
| CEd  | percentage normal births                   | 18 | 60115619 | 0.4545 | -2.43333 | 2.93603 | 7.43E-09 |
| BWd  | birth weight                               | 18 | 60115619 | 0.5106 | 3.97172  | 7.88372 | 3.63E-07 |
| CEd  | percentage normal births                   | 18 | 60122922 | 0.4653 | -2.43198 | 2.94304 | 5.32E-09 |
| BWd  | birth weight                               | 18 | 60122922 | 0.5173 | 3.67143  | 6.73165 | 2.51E-06 |
| CEd  | percentage normal births                   | 18 | 60122998 | 0.5347 | 2.42458  | 2.9251  | 5.81E-09 |
| BWd  | birth weight                               | 18 | 60122998 | 0.4827 | -3.67143 | 6.73165 | 2.51E-06 |
| CEd  | percentage normal births                   | 18 | 60123658 | 0.7034 | 2.8158   | 3.30857 | 1.13E-10 |
| BWd  | birth weight                               | 18 | 60123658 | 0.617  | -4.66815 | 10.2996 | 7.48E-09 |
| BWm  | birth weight                               | 18 | 60123658 | 0.6102 | -4.34913 | 8.99795 | 1.24E-06 |
| CEd  | percentage normal births                   | 18 | 60124094 | 0.2966 | -2.82874 | 3.33857 | 9.90E-11 |
| BWd  | birth weight                               | 18 | 60124094 | 0.383  | 4.66815  | 10.2996 | 7.48E-09 |
| BWm  | birth weight                               | 18 | 60124094 | 0.3898 | 4.34913  | 8.99795 | 1.24E-06 |
| CEd  | percentage normal births                   | 18 | 60124165 | 0.2966 | -2.81661 | 3.31025 | 1.18E-10 |
| BWd  | birth weight                               | 18 | 60124165 | 0.3831 | 4.66721  | 10.2962 | 7.51E-09 |
| BWm  | birth weight                               | 18 | 60124165 | 0.3899 | 4.33661  | 8.94693 | 1.32E-06 |
| CEd  | percentage normal births                   | 18 | 60126494 | 0.7036 | 2.81557  | 3.30638 | 1.10E-10 |
| BWd  | birth weight                               | 18 | 60126494 | 0.6173 | -4.4466  | 9.34224 | 3.85E-08 |
| CEd  | percentage normal births                   | 18 | 60130599 | 0.535  | 2.47337  | 3.04381 | 2.87E-09 |
| BWd  | birth weight                               | 18 | 60130599 | 0.4828 | -3.6705  | 6.72829 | 2.50E-06 |
| CEd  | percentage normal births                   | 18 | 60132042 | 0.8364 | 4.21279  | 4.85683 | 1.44E-19 |
| CEm  | percentage normal births                   | 18 | 60132042 | 0.8365 | 3.94127  | 4.24807 | 1.17E-07 |
| BWd  | birth weight                               | 18 | 60132042 | 0.742  | -4.07166 | 6.34773 | 3.40E-06 |
| CEd  | percentage normal births                   | 18 | 62084711 | 0.5358 | -2.34679 | 2.73961 | 1.02E-09 |
| CEd  | percentage normal births                   | 18 | 62162015 | 0.5227 | -1.7436  | 1.51695 | 3.34E-06 |
| CEd  | percentage normal births                   | 18 | 63178062 | 0.0547 | -4.42717 | 2.02704 | 8.07E-12 |
| GLd  | gestation length                           | 18 | 63178062 | 0.1288 | 5.86189  | 7.71111 | 1.98E-07 |
| BWd  | birth weight                               | 18 | 63178062 | 0.1279 | 5.31102  | 6.29117 | 3.94E-06 |
| GLd  | gestation length                           | 18 | 63232298 | 0.8582 | -5.67504 | 7.83773 | 7.47E-08 |
| CEd  | percentage normal births                   | 18 | 63404726 | 0.7697 | 1.88441  | 1.25888 | 7.39E-07 |
| GLd  | gestation length                           | 18 | 64017719 | 0.0987 | 6.70922  | 8.00619 | 1.21E-07 |
| GLm  | gestation length                           | 18 | 64017719 | 0.0994 | 6.61768  | 7.84269 | 3.83E-06 |
| CEd  | percentage normal births                   | 18 | 64875728 | 0.1838 | 2.03423  | 1.24132 | 2.73E-06 |
| SBd  | percentage live births                     | 18 | 65572003 | 0.707  | 6.68407  | 18.5092 | 1.79E-06 |
| GLm  | gestation length                           | 19 | 37519829 | 0.9703 | 9.95095  | 5.69901 | 4.15E-06 |
| SBm  | percentage live births                     | 20 | 33809571 | 0.8816 | 7.83013  | 12.801  | 1.22E-06 |
| SBm  | percentage live births                     | 20 | 33860963 | 0.226  | 5.23819  | 9.60006 | 2.00E-06 |
| DFS  | interval calving to insemination           | 20 | 34800041 | 0.154  | -3.39651 | 3.00624 | 5.71E-07 |
| IFLc | interval first to last insemination<br>cow | 20 | 34800041 | 0.1566 | -3.08087 | 2.5067  | 1.41E-06 |
| CEd  | percentage normal births                   | 21 | 8085052  | 0.4026 | -1.86249 | 1.6686  | 1.31E-07 |

|      |                                            |    |          |        |          |          |          |
|------|--------------------------------------------|----|----------|--------|----------|----------|----------|
| DFS  | interval calving to insemination           | 21 | 46641405 | 0.2262 | -2.85098 | 2.84538  | 7.36E-07 |
| DFS  | interval calving to insemination           | 21 | 46654373 | 0.3078 | -2.46262 | 2.58402  | 1.18E-06 |
| DFS  | interval calving to insemination           | 21 | 53671014 | 0.9561 | 4.95284  | 2.05733  | 7.49E-08 |
| DFS  | interval calving to insemination           | 21 | 54729058 | 0.0594 | -3.83215 | 1.63978  | 2.62E-06 |
| DFS  | interval calving to insemination           | 21 | 55195263 | 0.9167 | 3.46425  | 1.83267  | 4.87E-07 |
| DFS  | interval calving to insemination           | 21 | 55268653 | 0.973  | 8.72399  | 3.99235  | 1.08E-12 |
| IFLc | interval first to last insemination<br>cow | 21 | 55268653 | 0.9716 | 6.09288  | 2.04771  | 9.67E-08 |
| DFS  | interval calving to insemination           | 21 | 55464173 | 0.0687 | -3.66715 | 1.72174  | 1.32E-06 |
| DFS  | interval calving to insemination           | 21 | 56056064 | 0.9329 | 3.41779  | 1.46246  | 2.06E-06 |
| DFS  | interval calving to insemination           | 21 | 58564557 | 0.9728 | 5.79749  | 1.78179  | 8.76E-08 |
| NRh  | non-return rate heifer                     | 23 | 45311468 | 0.9262 | -4.63753 | 2.94111  | 2.37E-06 |
| CEd  | percentage normal births                   | 29 | 48027873 | 0.7943 | -1.89702 | 1.17592  | 3.37E-07 |
| CEd  | percentage normal births                   | 29 | 48411786 | 0.8767 | 2.04869  | 0.907531 | 4.13E-06 |
| NRc  | non-return rate cow                        | 29 | 48621040 | 0.3913 | -2.02971 | 1.96254  | 1.26E-06 |
| CEd  | percentage normal births                   | 29 | 49234278 | 0.625  | 1.59205  | 1.18812  | 8.14E-08 |
| CEd  | percentage normal births                   | 29 | 49646800 | 0.7658 | 2.22174  | 1.77039  | 1.13E-10 |
| SBd  | percentage live births                     | 29 | 49646800 | 0.763  | 7.26634  | 19.0962  | 2.44E-07 |
| NRc  | non-return rate cow                        | 29 | 49667536 | 0.1743 | -2.31383 | 1.54121  | 3.93E-06 |
| CEd  | percentage normal births                   | 29 | 50618364 | 0.1016 | -2.66216 | 1.29352  | 5.80E-08 |
| CEd  | percentage normal births                   | 29 | 50642202 | 0.9018 | 2.37772  | 1.00132  | 5.89E-07 |
| SBd  | percentage live births                     | 29 | 50642202 | 0.9166 | 9.80218  | 14.6898  | 2.65E-06 |

**Supplementary Table S6: Comprehensive list of potential candidate causative variants and their segregation in different dataset and populations**

| name              | chrom | start <sup>a</sup> | end <sup>a</sup> | haplotype information |                             |                             | approach   | chr | position | reference allele                        | variant allele | gene           |
|-------------------|-------|--------------------|------------------|-----------------------|-----------------------------|-----------------------------|------------|-----|----------|-----------------------------------------|----------------|----------------|
|                   |       |                    |                  | haplotype frequency   | observed homozygous carrier | expected homozygous carrier |            |     |          |                                         |                |                |
| HH21 <sup>c</sup> | 7     | 7871925            | 10432630         | 0.055                 | 0                           | 157                         | trio & pgp | 7   | 7913459  | CTTG                                    | C              | <i>NOTCH3</i>  |
| HH3 <sup>de</sup> | 8     | 90958661           | 92084831         | 0.014                 | 0                           | 10                          | trio & pgp | 8   | 93753358 | T                                       | C              | <i>SMC2</i>    |
| HH25              | 10    | 86876435           | 87772797         | 0.020                 | 5                           | 20                          | trio       | 10  | 84938370 | CTGGTGGAGGC<br>GCAGACCCCGG<br>CGGCACGCT | C              | <i>RIOX1</i>   |
| HH13 <sup>f</sup> | 18    | 60931980           | 62100899         | 0.018                 | 1                           | 17                          | trio & pgp | 18  | 62758881 | G                                       | A              | <i>KIR2DS1</i> |
| HH35              | 26    | 3358717            | 4234871          | 0.024                 | 7                           | 31                          | pgp        | 26  | 5325675  | C                                       | G              | <i>PCDH15</i>  |

<sup>a</sup> according to the reference sequence ARS-UCD1.2 (National Center for Biotechnology Information, 2018a)

<sup>b</sup> according to the NCBI Annotation Release 106 (National Center for Biotechnology Information, 2018b)

<sup>c</sup> haplotype described before as 07-126 by VanRaden *et al.* (2011) and Sahana *et al.* (2013)

<sup>d</sup> haplotype previously described by VanRaden *et al.* (2011), McClure *et al.* (2013), Sahana *et al.* (2013) and Wu *et al.* (2019)

<sup>e</sup> variant previously detected by McClure *et al.* (2014)

<sup>f</sup> haplotype previously described by Fritz *et al.* (2013)

**candidate variant**

| <b>gene name</b>                                                                      | <b>associated disorder / gene function</b>                                                                                     | <b>OMIM / OMIA</b>   | <b>effect</b>               | <b>transcript<sup>b</sup></b> | <b>base change<sup>b</sup></b>                     |
|---------------------------------------------------------------------------------------|--------------------------------------------------------------------------------------------------------------------------------|----------------------|-----------------------------|-------------------------------|----------------------------------------------------|
| notch receptor 3                                                                      | myofibrinomatosis / cerebral arteriopathy with subcortical infarcts and leukoencephalopathy, type 1 (CADASIL1)                 | 600276 + 125310      | disruptive inframe deletion | XM_003586246.3                | c.129_131delTTG                                    |
| structural maintenance of chromosomes 2                                               | embryonic lethality                                                                                                            | 605576 / 001824-9913 | missense variant            | XM_015472668.2                | c.3404T>C                                          |
| ribosomal oxygenase 1                                                                 | chromatin organisation, negative regulation of osteoblast differentiation, negative regulation of transcription, DNA-templated | 611919               | disruptive inframe deletion | NM_001099702.1                | c.396_425delGGCGC<br>AGACCCCGGCGGC<br>ACGCTTGGTGGA |
| killer cell immunoglobulin like receptor, two Ig domains and short cytoplasmic tail 1 | function in placentation and during pregnancy, integral component of membrane                                                  | 604952               | stop gain variant           | NM_001097567.1                | c.475C>T                                           |
| protocadherin related 15                                                              | Usher syndrome, deafness                                                                                                       | 605514               | missense variant            | XM_015460562.2                | c.2599C>G                                          |

| amino acid change  | siftScore | siftScore prediction (cutoff=-2.5) | WGS information 691 genomes |                   |                  |      |         |         |         |         | SWISSCOW information |      |         |         |         |
|--------------------|-----------|------------------------------------|-----------------------------|-------------------|------------------|------|---------|---------|---------|---------|----------------------|------|---------|---------|---------|
|                    |           |                                    | average PhyloP              | average phastCons | allele frequency | LD   | ref hom | var het | var hom | missing | allele frequency LD  | LD   | ref hom | var het | var hom |
| p.Cys44del         | -6.75     | deleterious                        | 2.61                        | 0.984             | 0.014            | 0.49 | 657     | 8       | 0       | 26      |                      |      |         |         |         |
| p.Phe1135Ser       | -7.67     | deleterious                        | 7.74                        | 1                 | 0.014            | 1.00 | 679     | 11      | 0       | 1       | 0.017                | 0.85 | 5447    | 147     | 0       |
| p.Ala133_Glu142del | 0.659     | neutral                            | NA                          | NA                | 0.016            | 1.00 | 603     | 25      | 1       | 62      |                      |      |         |         |         |
| p.Gln159*          |           |                                    | -0.517                      | 0.0176            | NA               | NA   | 666     | 22      | 0       | 3       | 0.018                | 0.49 | 5030    | 557     | 0       |
| p.Leu867Val        | -0.507    | neutral                            | 2.08                        | 1                 | 0.014            | 1.00 | 663     | 27      | 1       | 0       |                      |      |         |         |         |



| ation Holstein population |         |                     |                              | SWISSCOW   |            |            |         | 1kBulls information (run 8; 4109 genomes) |            |            |         | breed occurrence                                                                                                                                                                                                                                          |
|---------------------------|---------|---------------------|------------------------------|------------|------------|------------|---------|-------------------------------------------|------------|------------|---------|-----------------------------------------------------------------------------------------------------------------------------------------------------------------------------------------------------------------------------------------------------------|
| expected<br>var hom       | missing | allele<br>frequency | pHWE<br>(Chi-<br>square<br>) | ref<br>hom | var<br>het | var<br>hom | missing | ref<br>hom                                | var<br>het | var<br>hom | missing |                                                                                                                                                                                                                                                           |
|                           |         |                     |                              |            |            |            |         | 3743                                      | 3          | 0          | 363     | Holstein, Salers, Shorthorn                                                                                                                                                                                                                               |
| 1                         | 9       | 0.013               | 1                            | 8628       | 1          | 0          | 9       | 4018                                      | 59         | 0          | 32      | Holstein                                                                                                                                                                                                                                                  |
|                           |         |                     |                              |            |            |            |         | 3480                                      | 97         | 16         | 516     | Holstein, Angus, Belgian Blue, Bohuskulla, Brown Swiss, Charolais, Chianina, DSB, Fjäll, Hereford, Jersey, Limousin, Montbeliarde, Normande, Norwegian Red, Ringamako, Rölla, Romagnola, Shorthorn, Simmental, Tarentaise, Ukrainian Grey, Yakut, Yanbian |
| 12                        | 16      | 0.050               | 7E-07                        | 8611       | 8          | 0          | 19      | 3963                                      | 132        | 0          | 14      | Holstein, Angus, Ayshire, Charolais, Danish Red Dairy, DSB, Fjäll, Maine Anjou, Meuse Rhine Ysel, Norwegian Red, Original Braunvieh, Podolian, Ringamako, Romagnola, Shorthorn, Simmental, Swedish Red, Väko                                              |
|                           |         |                     |                              |            |            |            |         | 3992                                      | 91         | 7          | 19      | Holstein, Ayrshire, Norwegian Red                                                                                                                                                                                                                         |
